# Supplementary material
Source: publisher figshare collection journal article supplement (https://acs.figshare.com/ndownloader/files/26606553)
Supplement: Supplementary file 1 [file 26606553]

## ***Supporting Information***

### **Organocatalyzed Cascade Aza-Michael/Aldol Reaction for Atroposelective Construction of 4-Naphthylquinoline-3-carbaldehydes**

Jing Zhang,<sup>†</sup> Yong Xu,<sup>§</sup> Zhiming Wang,<sup>†\*</sup> Rong Zhong,<sup>§</sup> Yurong Wang<sup>§\*</sup>

<sup>†</sup> *Advanced Research Institute and Department of Chemistry, Taizhou University, 1139 Shifu Avenue, Taizhou 318000, People's Republic of China*

<sup>§</sup> *College of Pharmaceutical Science, Zhejiang Chinese Medical University, Hangzhou, Zhejiang 311400, People's Republic of China*

E-mail: [wzmmol@hotmail.com](mailto:wzmmol@hotmail.com); [yrwang1024@hotmail.com](mailto:yrwang1024@hotmail.com)

## Table of contents

|                                                                             |     |
|-----------------------------------------------------------------------------|-----|
| 1. X-Ray Crystallographic Information                                       | S3  |
| 2. Copies of $^1\text{H}$ NMR and $^{13}\text{C}\{^1\text{H}\}$ NMR Spectra | S5  |
| 3. Chiral HPLC Analysis                                                     | S43 |

## 1. X-Ray Crystallographic Information

The crystal of product **4** was obtained by slow evaporation in  $\text{CHCl}_3$  and hexane. The X-ray data were collected on a Bruker APEX-II CCD diffractometer with CuK $\alpha$  radiation for determination of the absolute configuration. Crystal data have been deposited to CCDC, number 2050040. The ellipsoid contour percent probability level of **4** is 50%.

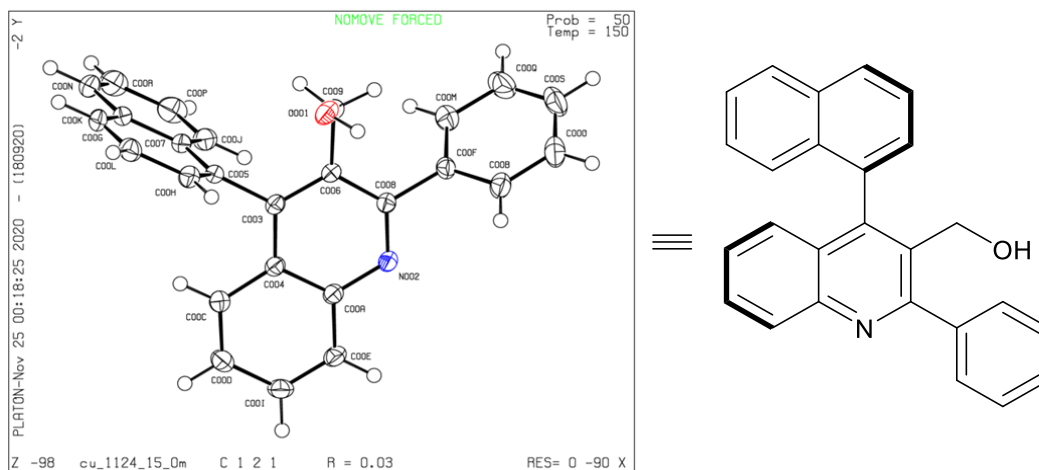

**Figure S1. X-ray Structure of 4**

**Crystal Data.**  $\text{C}_{26}\text{H}_{19}\text{NO}$ ,  $M_r = 361.42$ , monoclinic, C2 (No. 5),  $a = 16.7081(11)$  Å,  $b = 8.1960(5)$  Å,  $c = 13.8836(9)$  Å,  $b = 101.802(2)$ ,  $a = g = 90^\circ$ ,  $V = 1861.0(2)$  Å<sup>3</sup>,  $T = 150.0$  K,  $Z = 4$ ,  $Z' = 1$ ,  $m(\text{CuK}\alpha) = 0.608$ , 22204 reflections measured, 3942 unique ( $R_{\text{int}} = 0.0312$ ) which were used in all calculations. The final  $wR_2$  was 0.0803 (all data) and  $R_1$  was 0.0297 ( $I \geq 2 \sigma(I)$ ).

Table S1. X-ray Data of 4

| Compound                     | cu_1124_15                         |
|------------------------------|------------------------------------|
| Formula                      | C <sub>26</sub> H <sub>19</sub> NO |
| $D_{calc.}/\text{g cm}^{-3}$ | 1.290                              |
| $m/\text{mm}^{-1}$           | 0.608                              |
| Formula Weight               | 361.42                             |
| Colour                       | colourless                         |
| Shape                        | block                              |
| Size/mm <sup>3</sup>         | 0.18×0.15×0.10                     |
| $T/\text{K}$                 | 150.0                              |
| Crystal System               | monoclinic                         |
| Flack Parameter              | 0.00(7)                            |
| Hooft Parameter              | 0.02(7)                            |
| Space Group                  | C2                                 |
| $a/\text{\AA}$               | 16.7081(11)                        |
| $b/\text{\AA}$               | 8.1960(5)                          |
| $c/\text{\AA}$               | 13.8836(9)                         |
| $a^\circ$                    | 90                                 |
| $b^\circ$                    | 101.802(2)                         |
| $g^\circ$                    | 90                                 |
| $V/\text{\AA}^3$             | 1861.0(2)                          |
| $Z$                          | 4                                  |
| $Z'$                         | 1                                  |
| Wavelength/ $\text{\AA}$     | 1.54178                            |
| Radiation type               | CuK $\alpha$                       |
| $Q_{min}^\circ$              | 3.252                              |
| $Q_{max}^\circ$              | 79.484                             |
| Measured Refl's.             | 22204                              |
| Indep't Refl's               | 3942                               |
| Refl's $I \geq 2\sigma(I)$   | 3840                               |
| $R_{int}$                    | 0.0312                             |
| Parameters                   | 254                                |
| Restraints                   | 1                                  |
| Largest Peak                 | 0.215                              |
| Deepest Hole                 | -0.144                             |
| GooF                         | 1.027                              |
| $wR_2$ (all data)            | 0.0803                             |
| $wR_2$                       | 0.0792                             |
| $R_1$ (all data)             | 0.0307                             |
| $R_1$                        | 0.0297                             |



## 2. Copies of $^1\text{H}$ NMR and $^{13}\text{C}\{^1\text{H}\}$ NMR Spectra

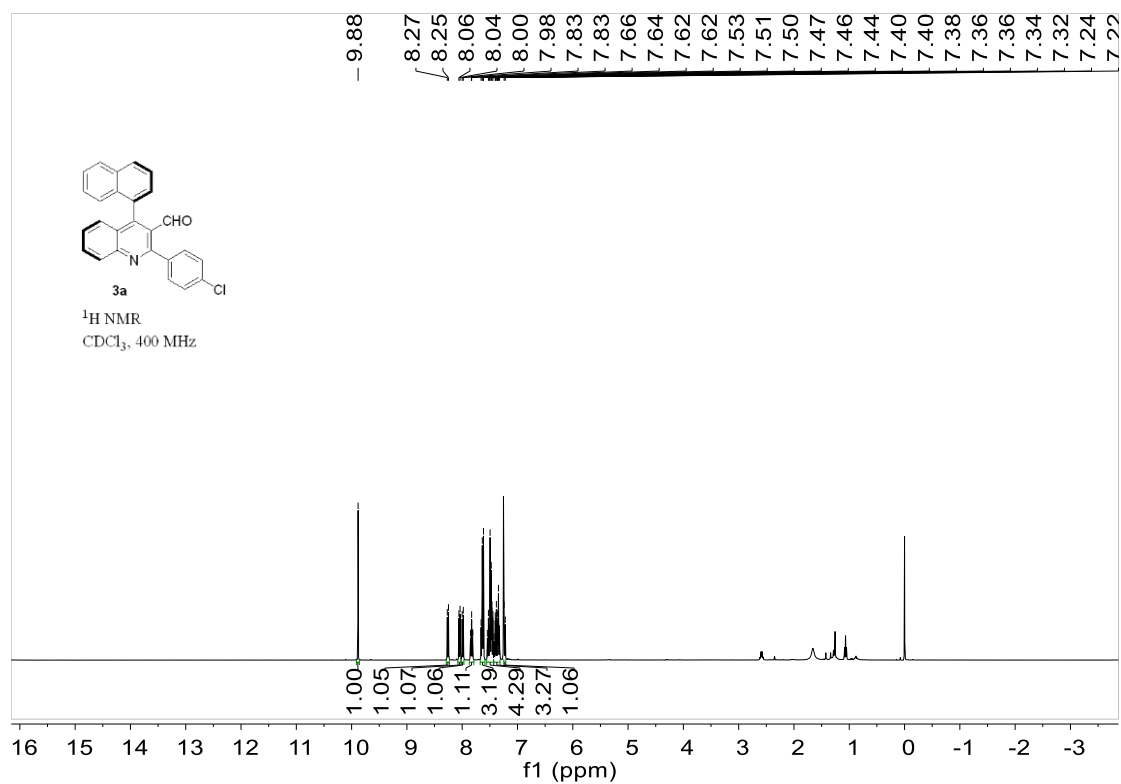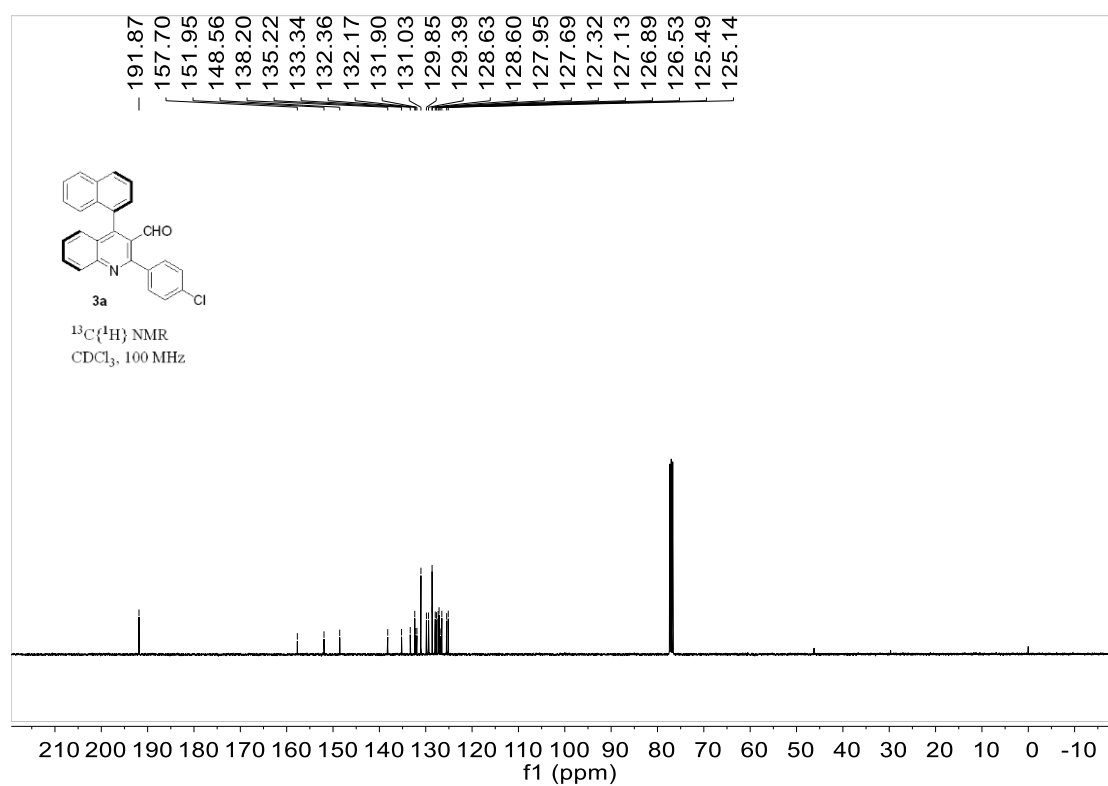

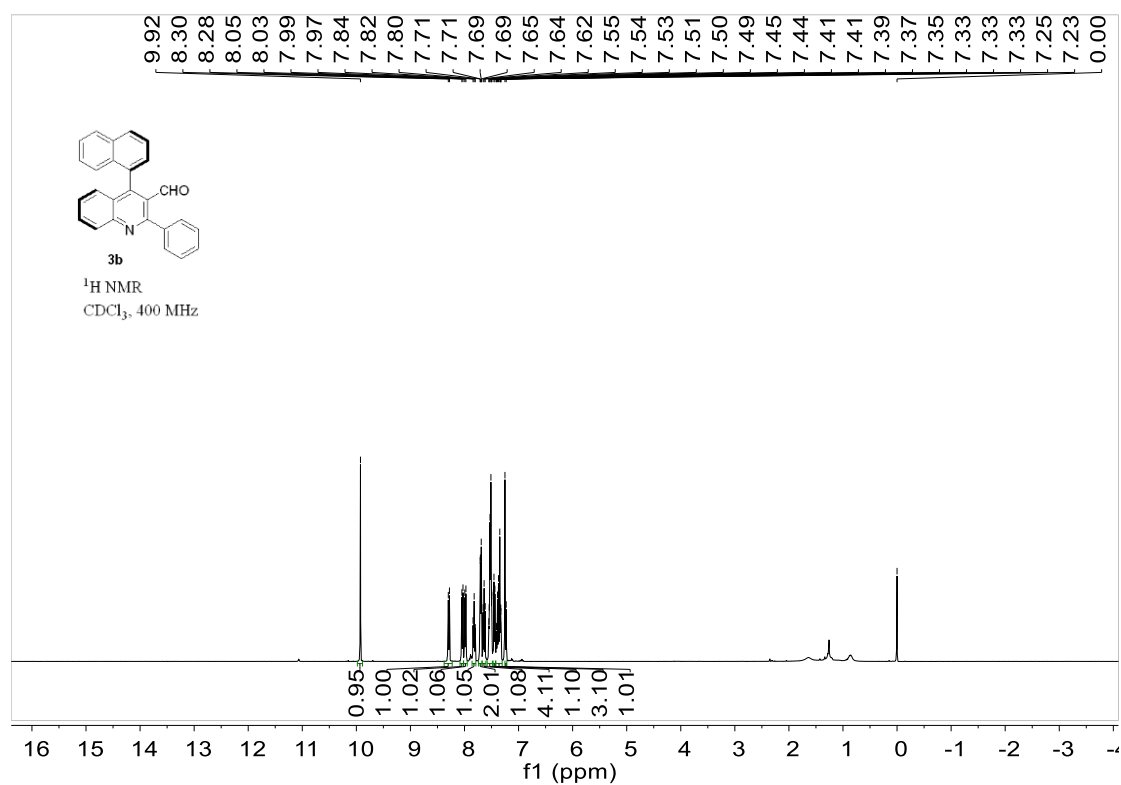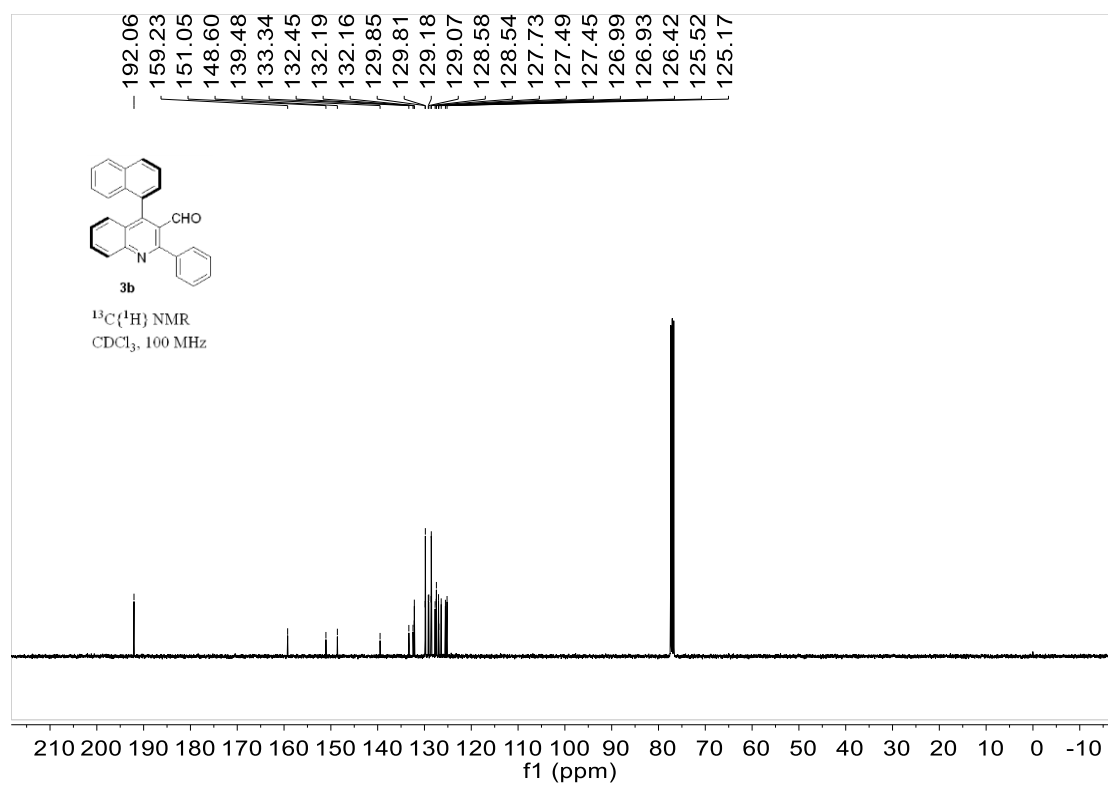

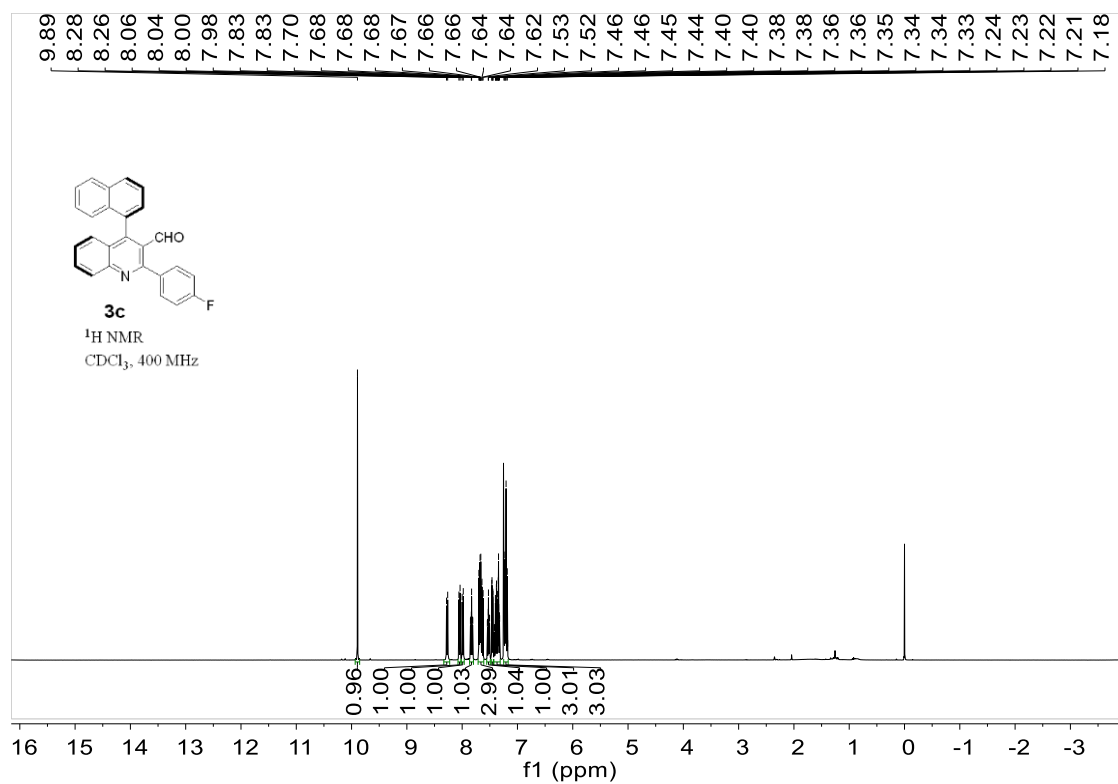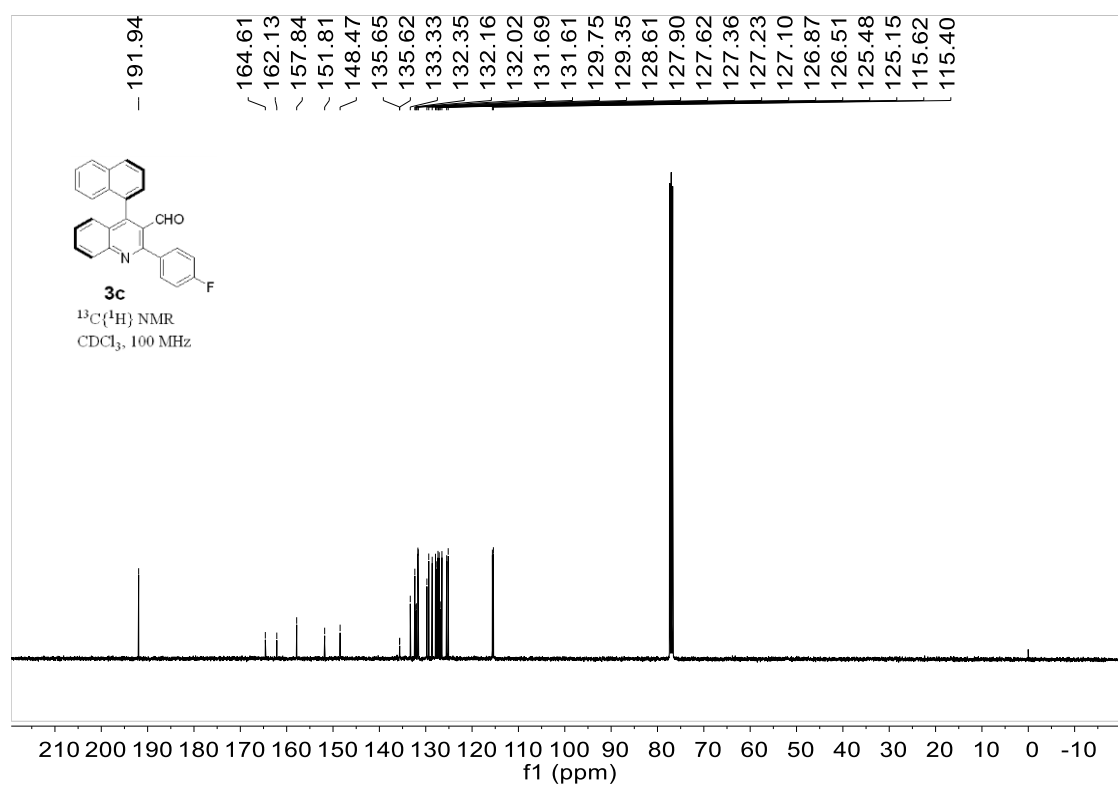

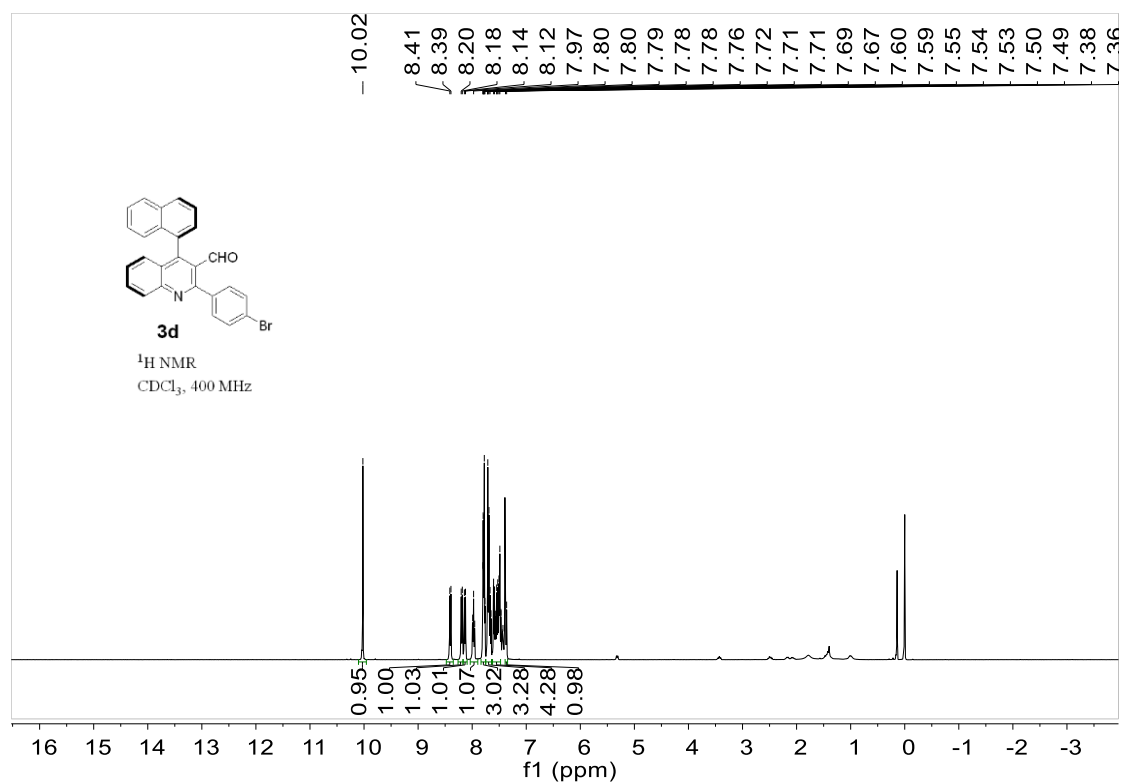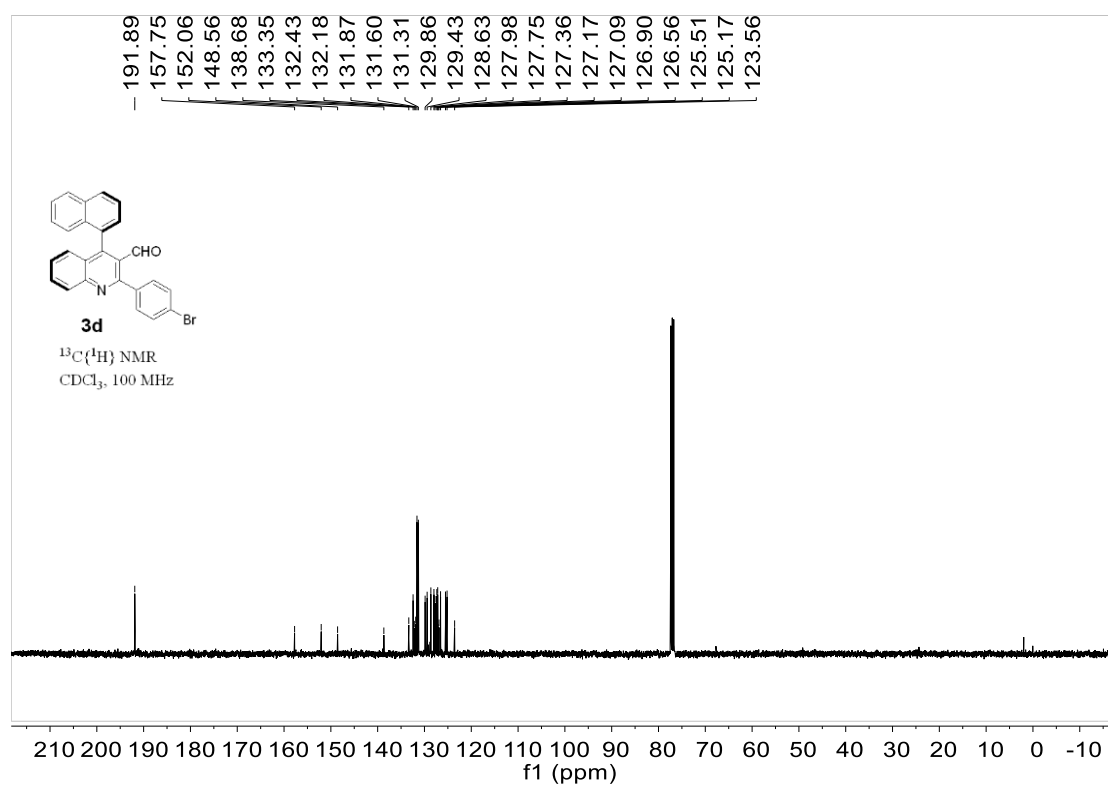

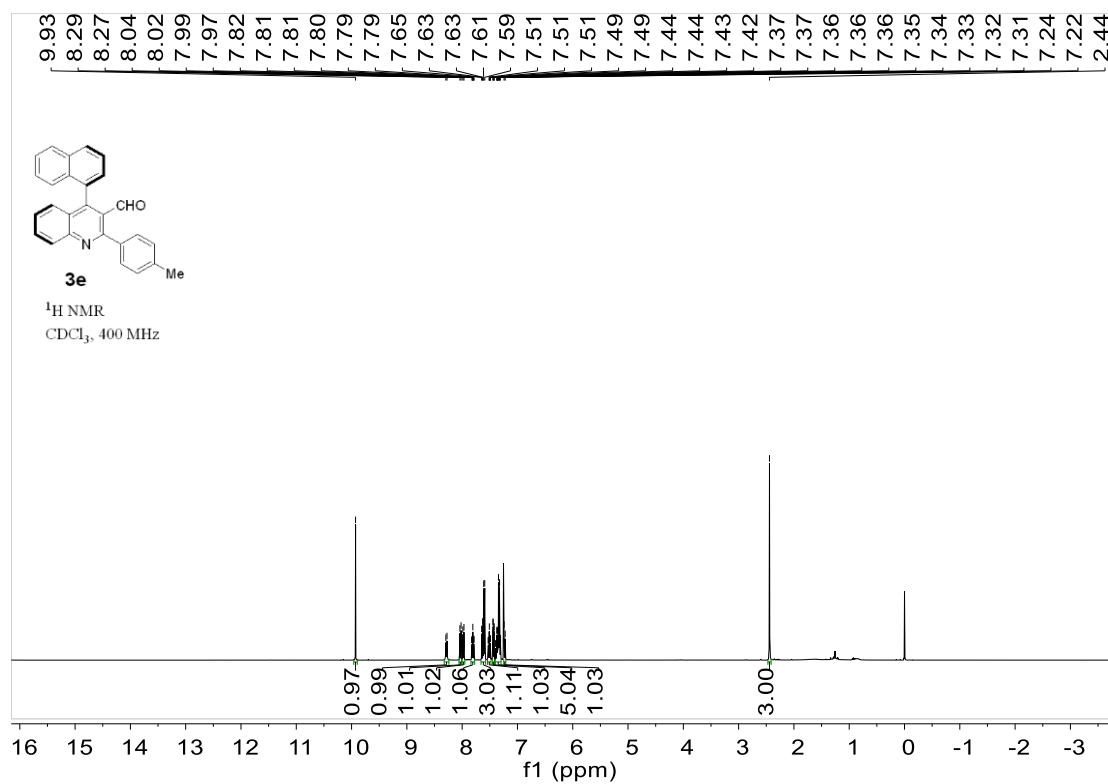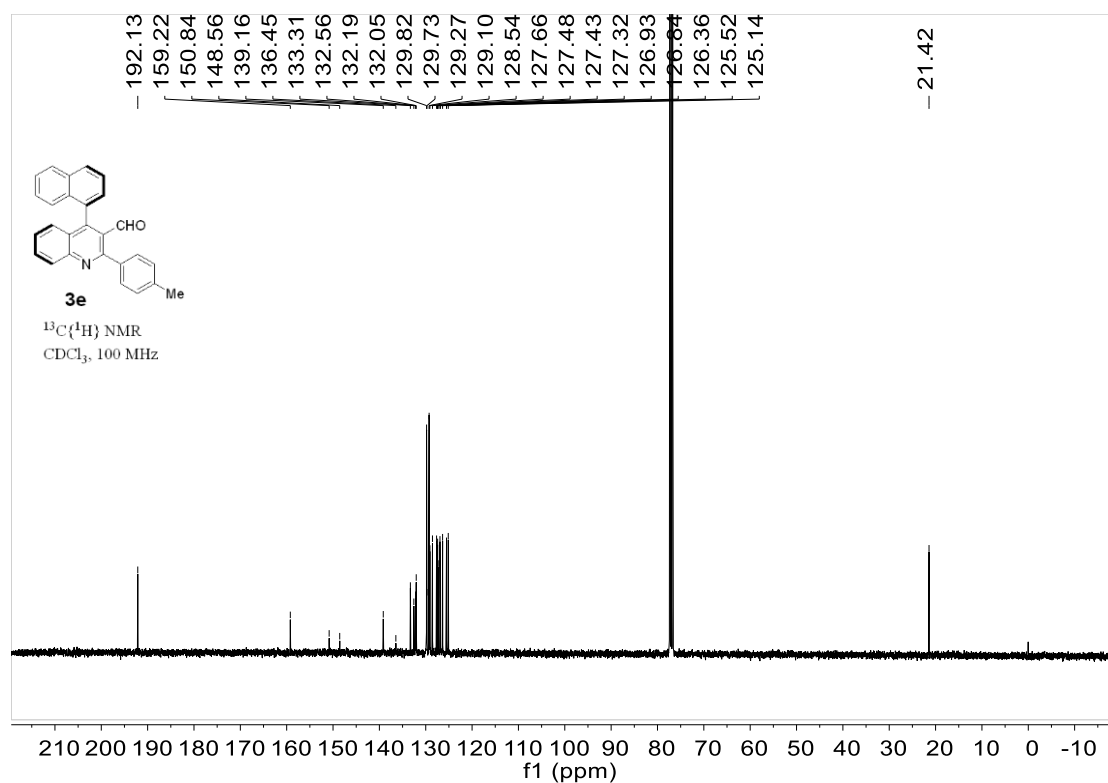

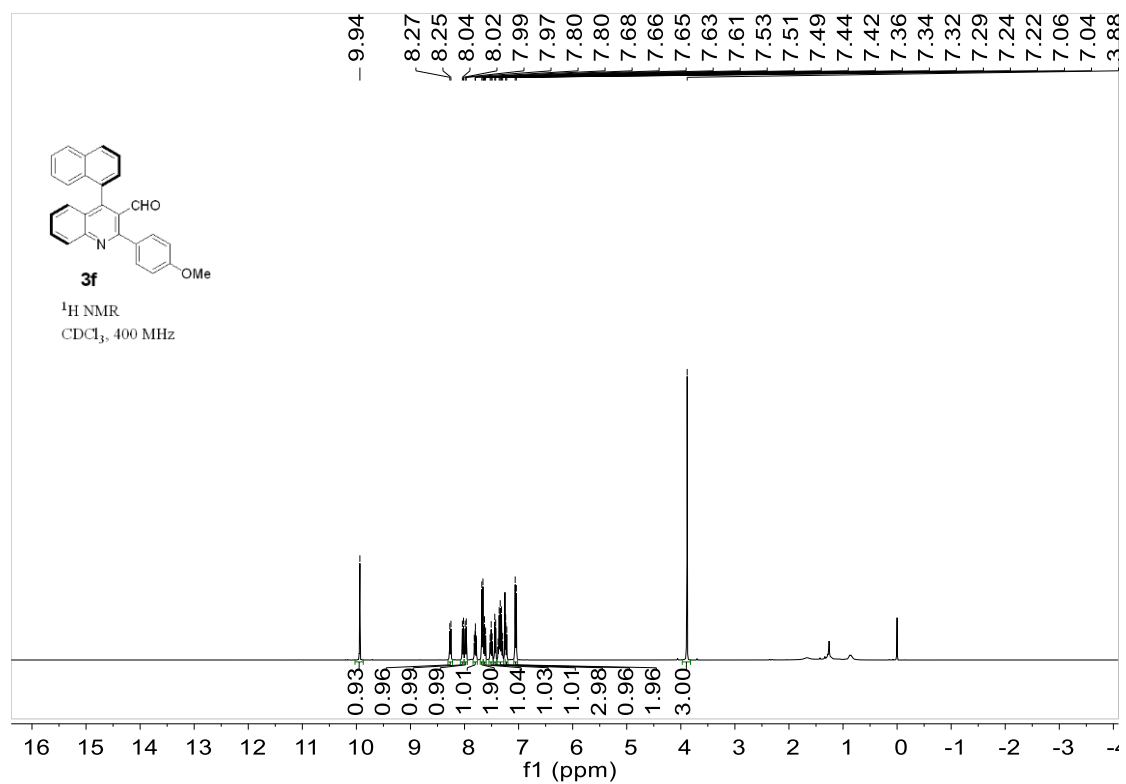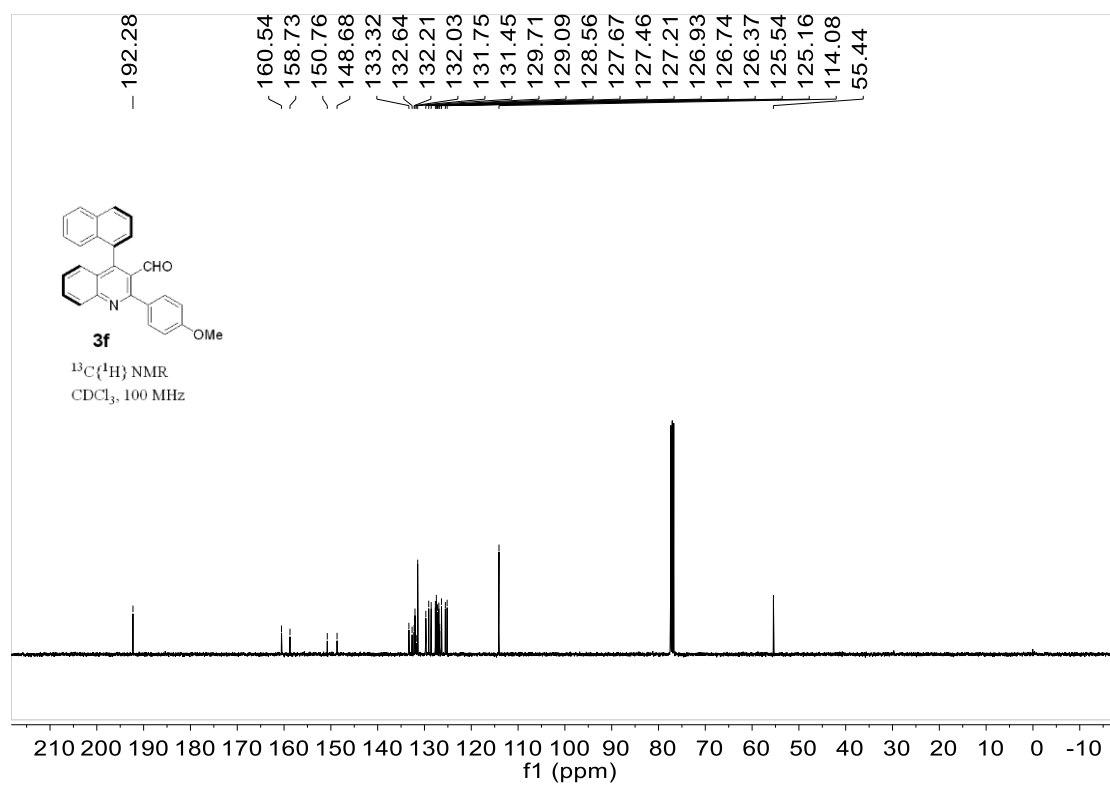

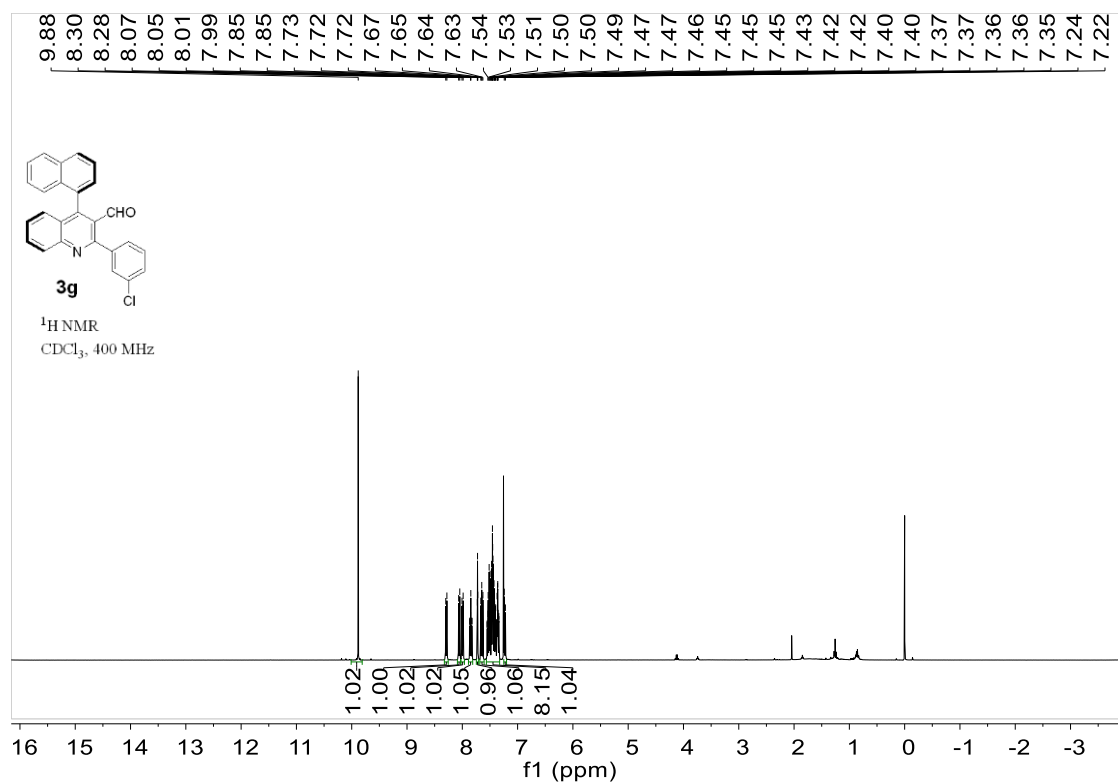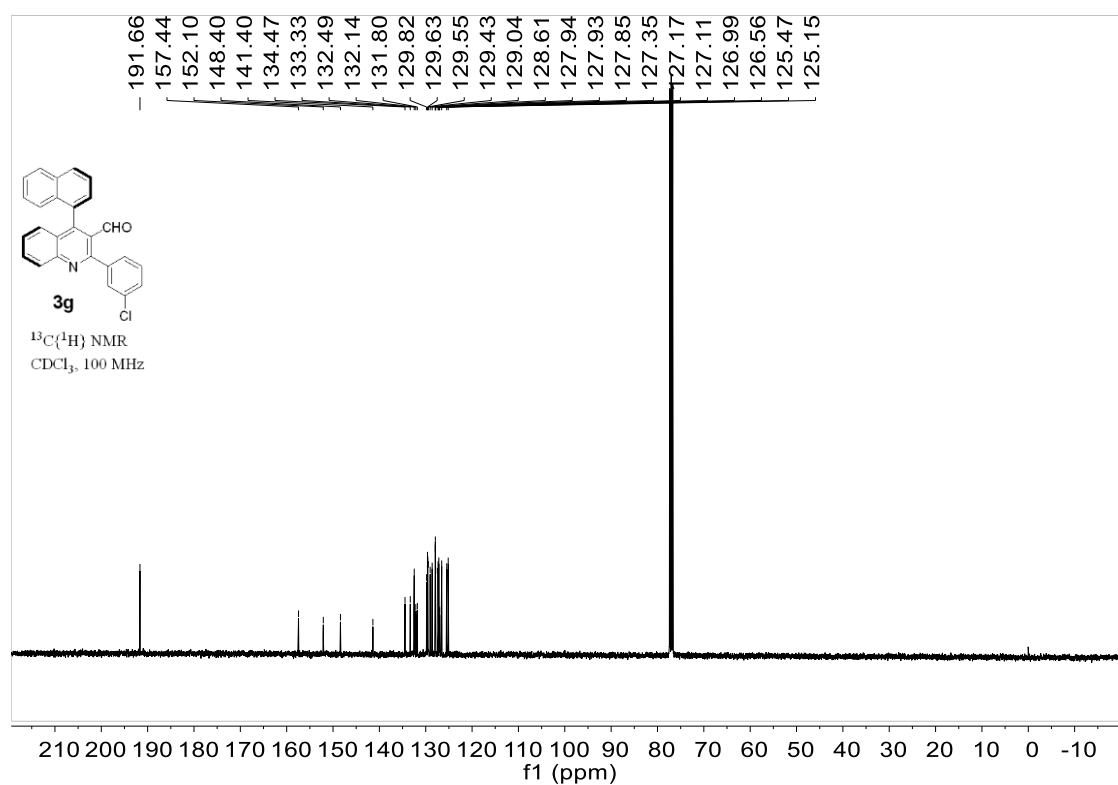

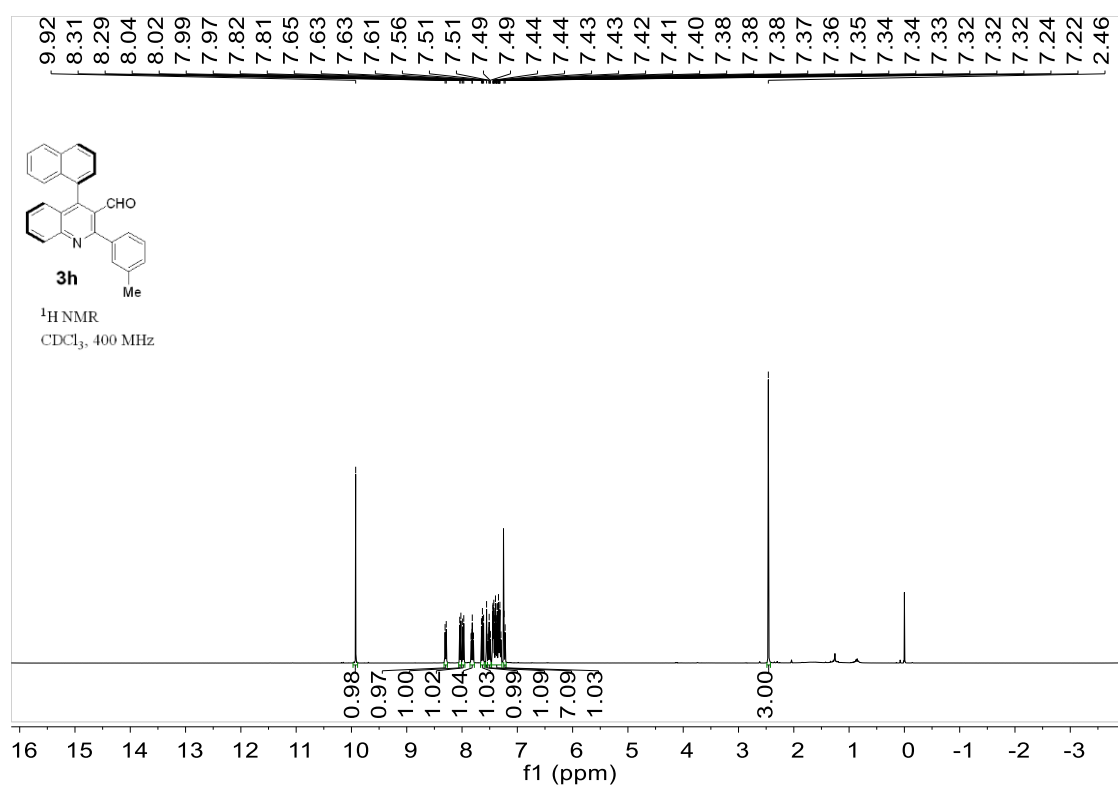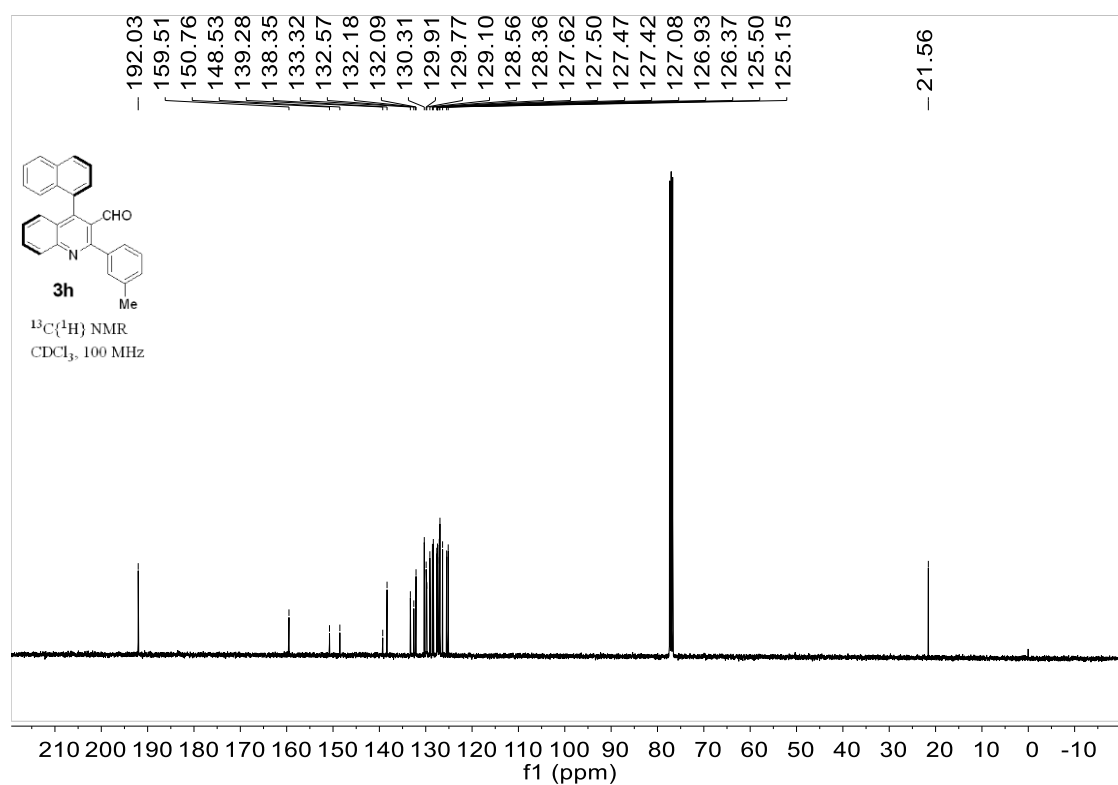



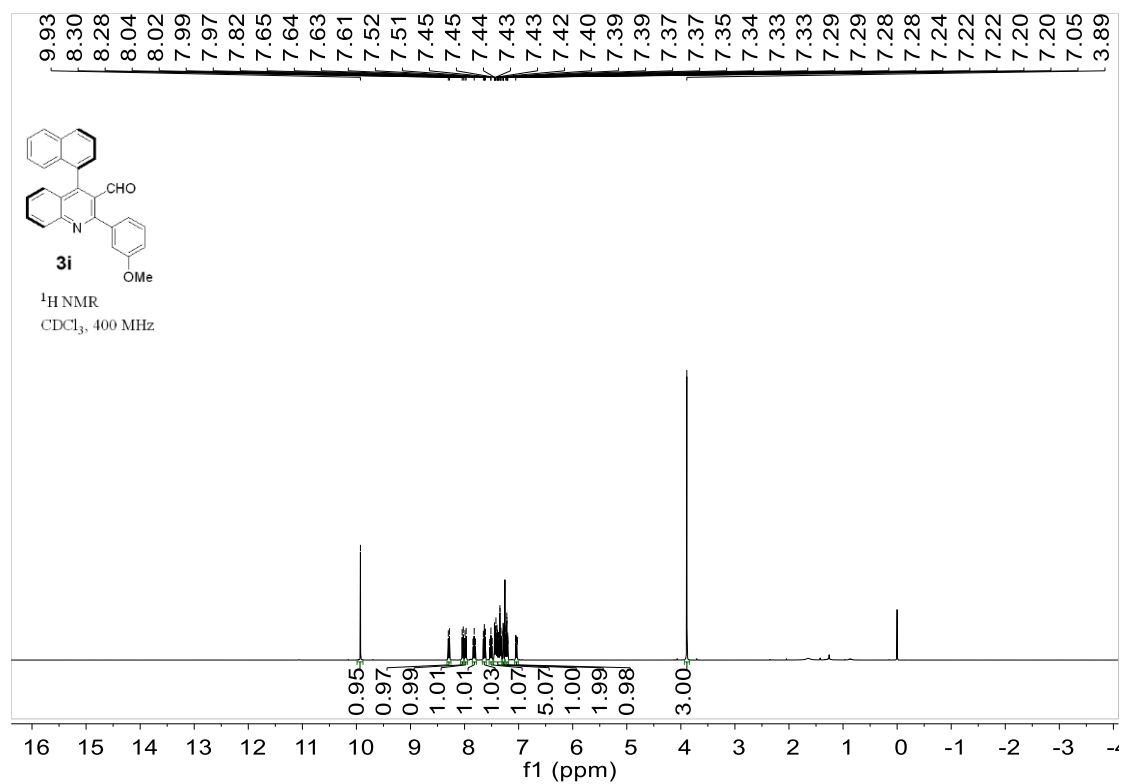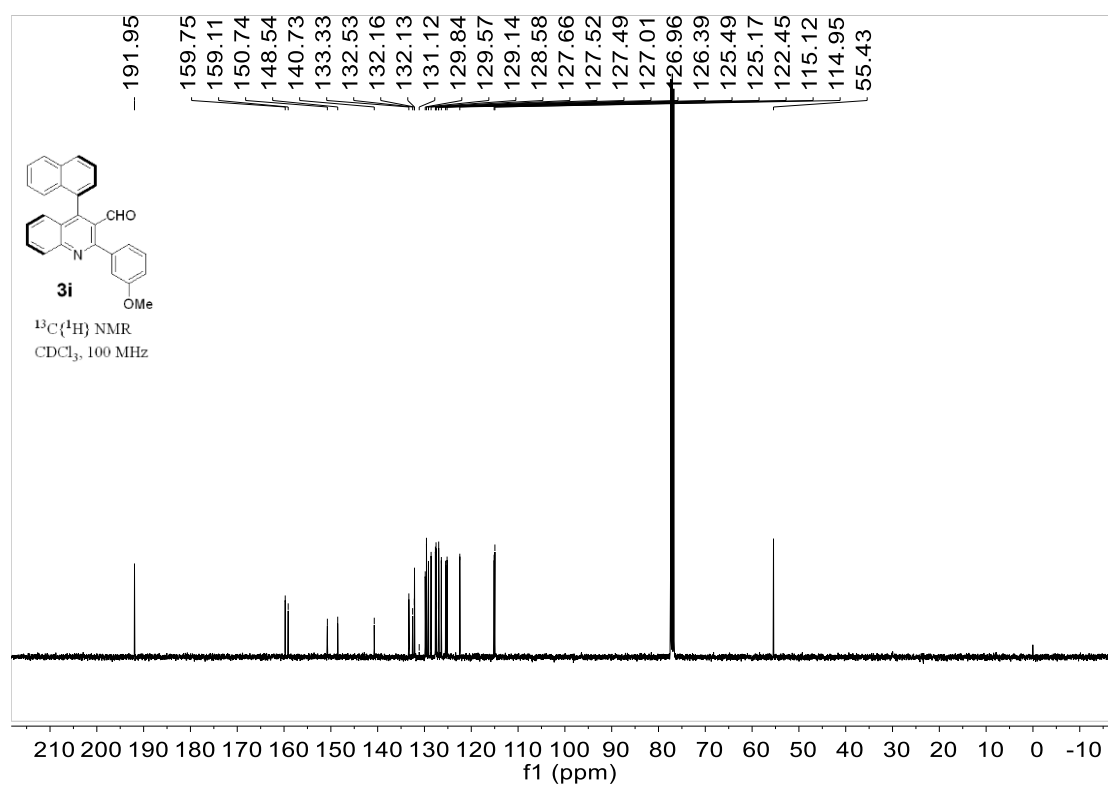

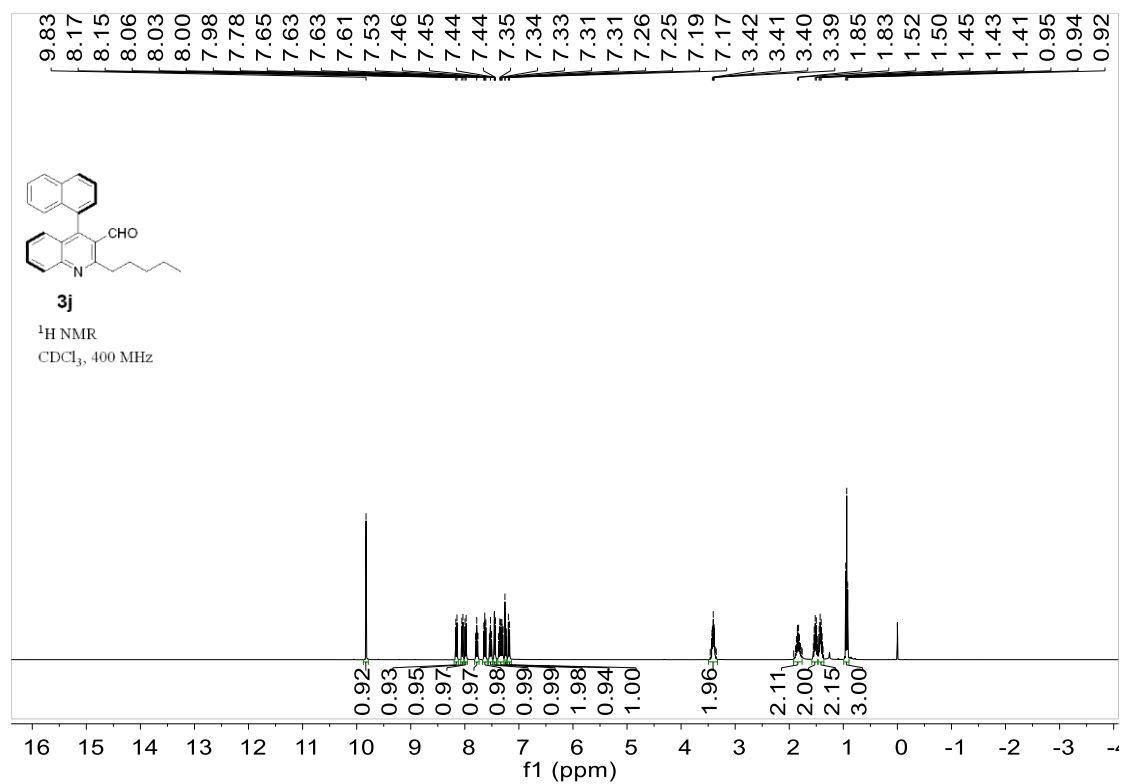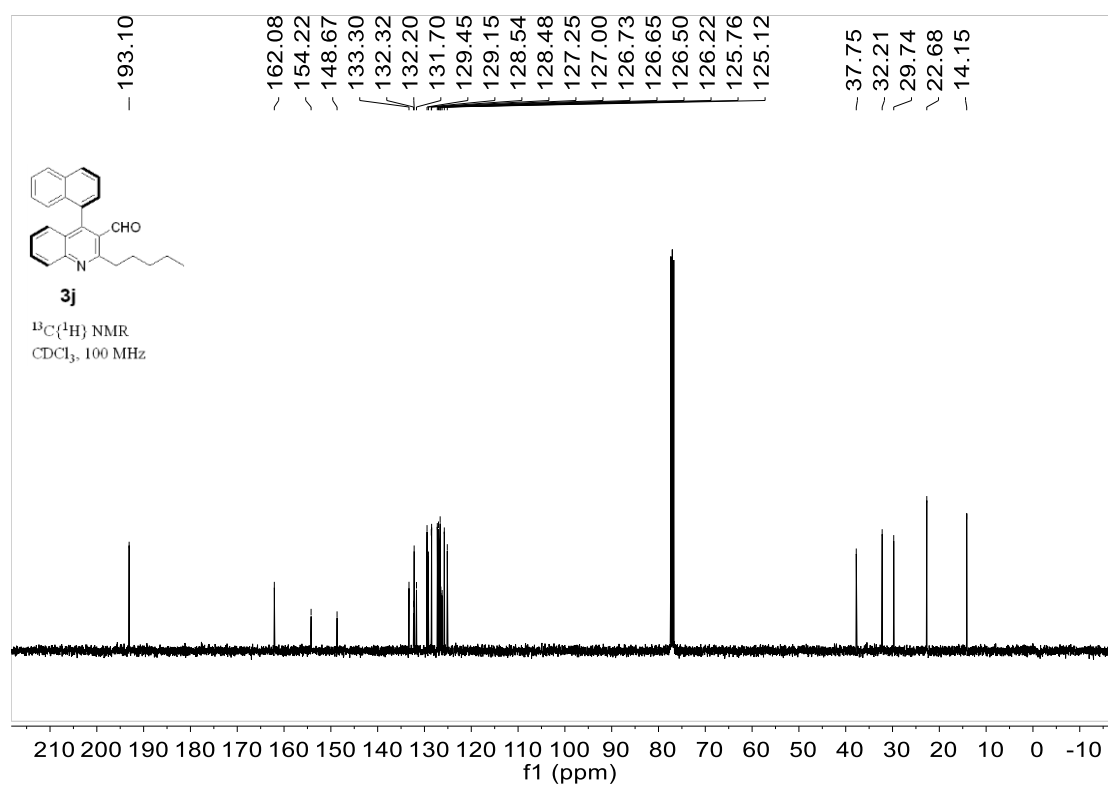

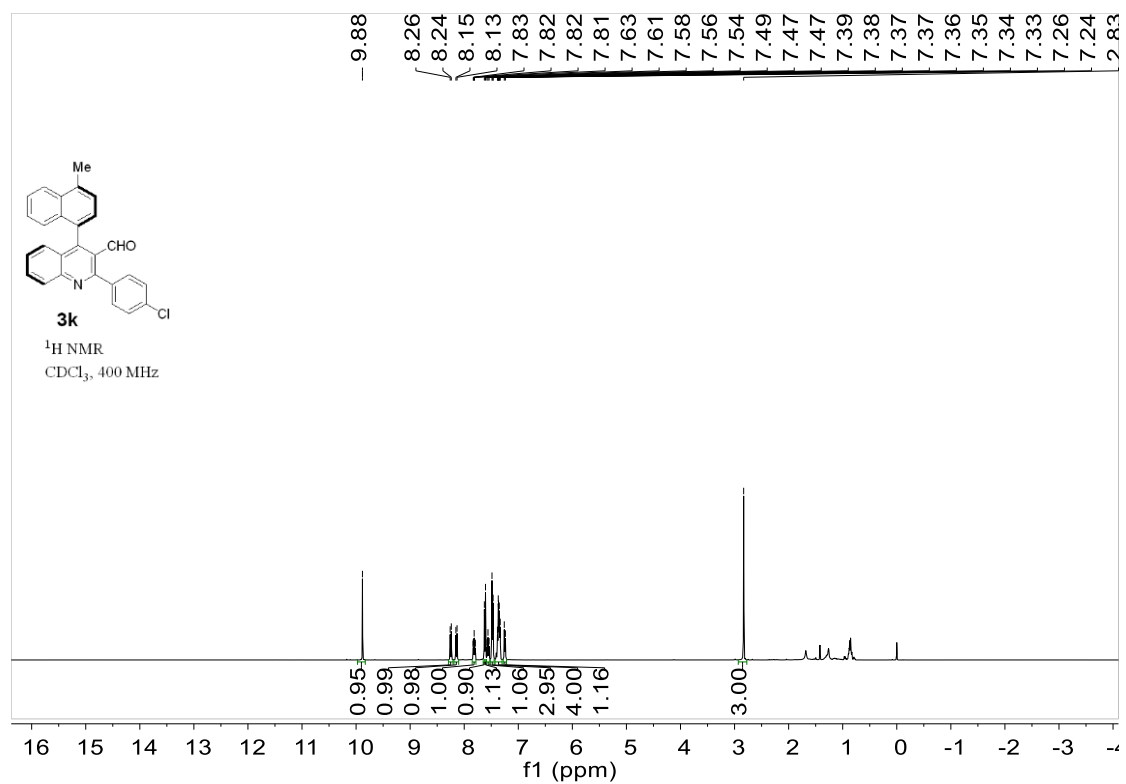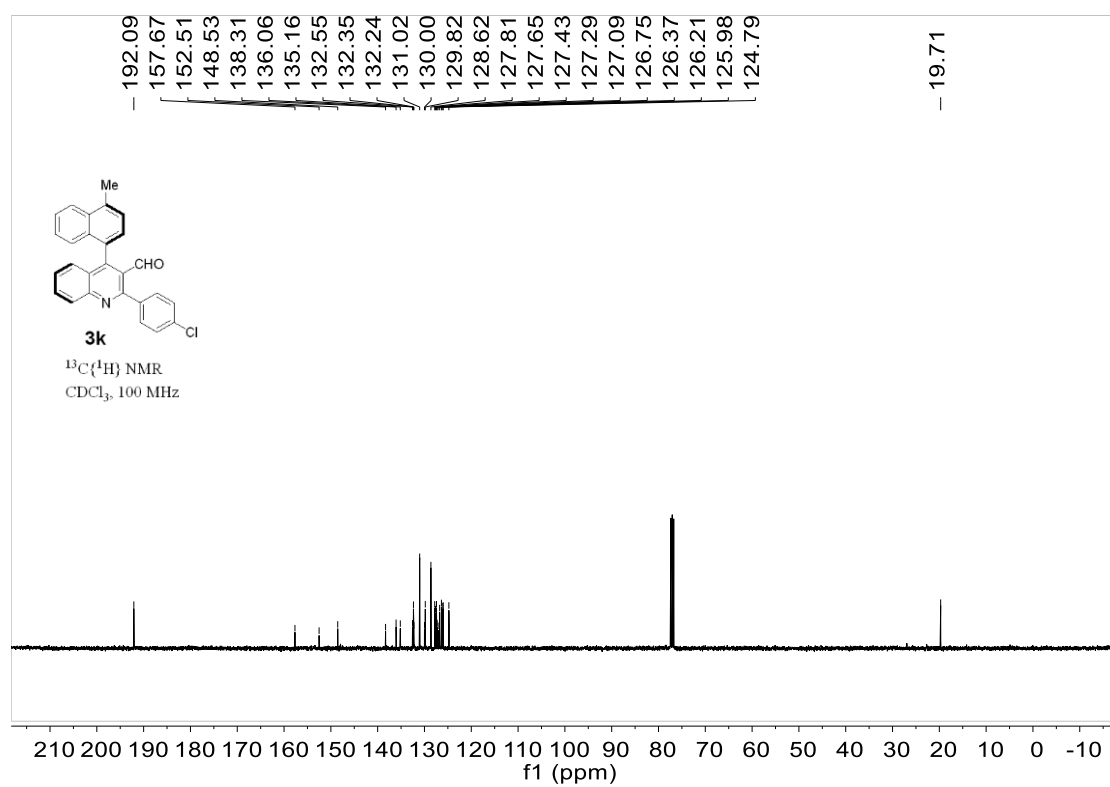

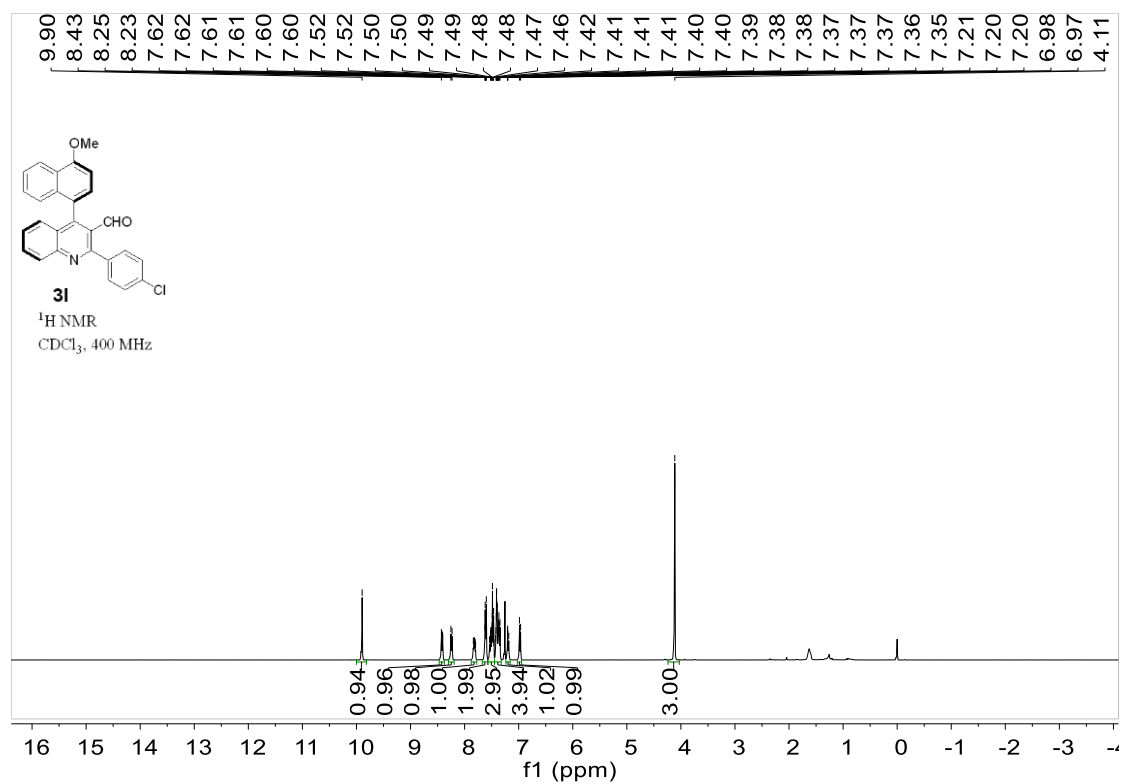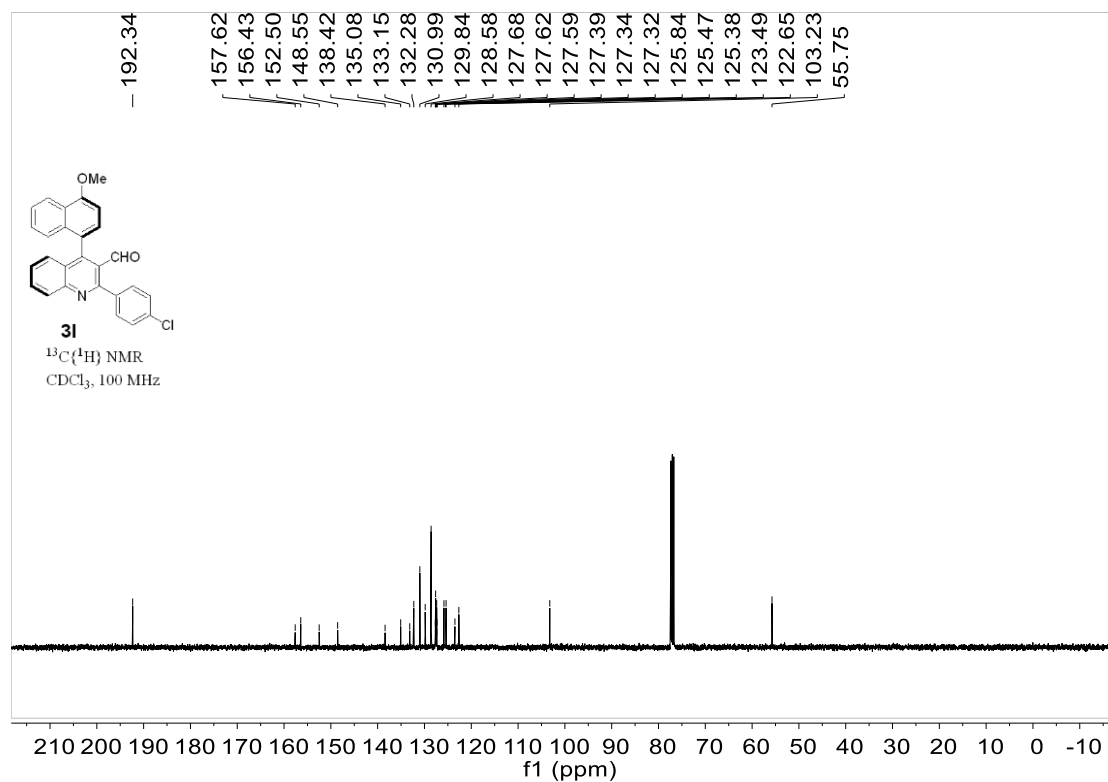

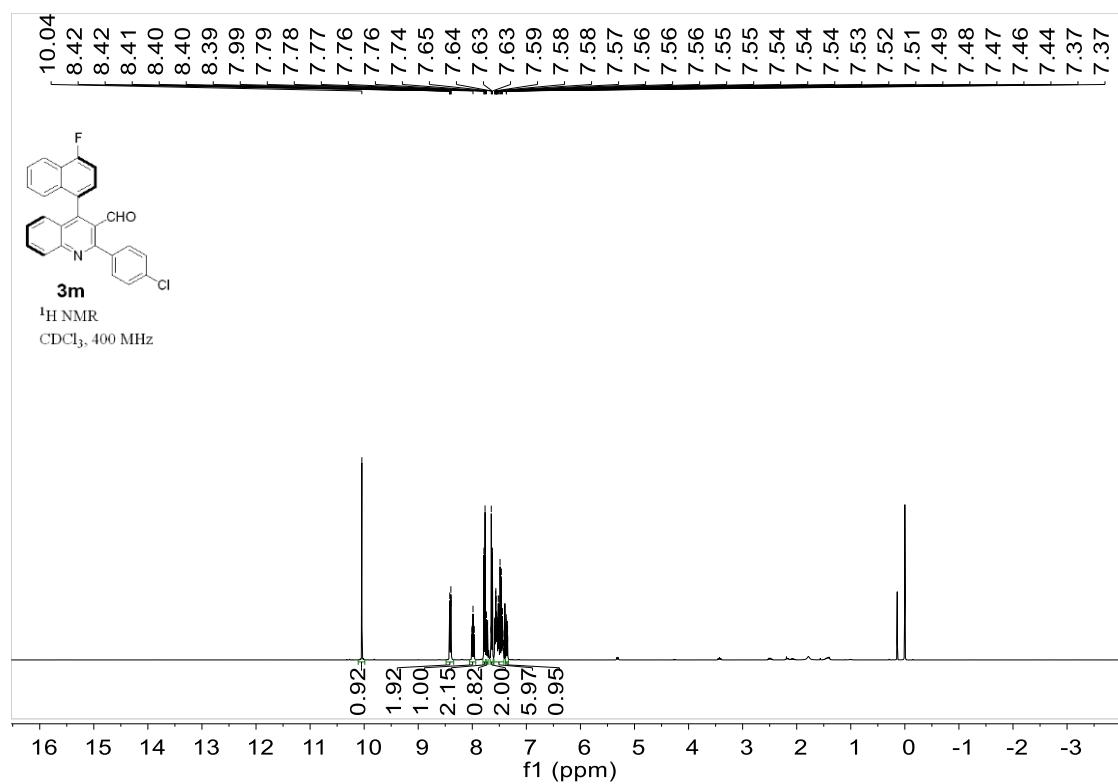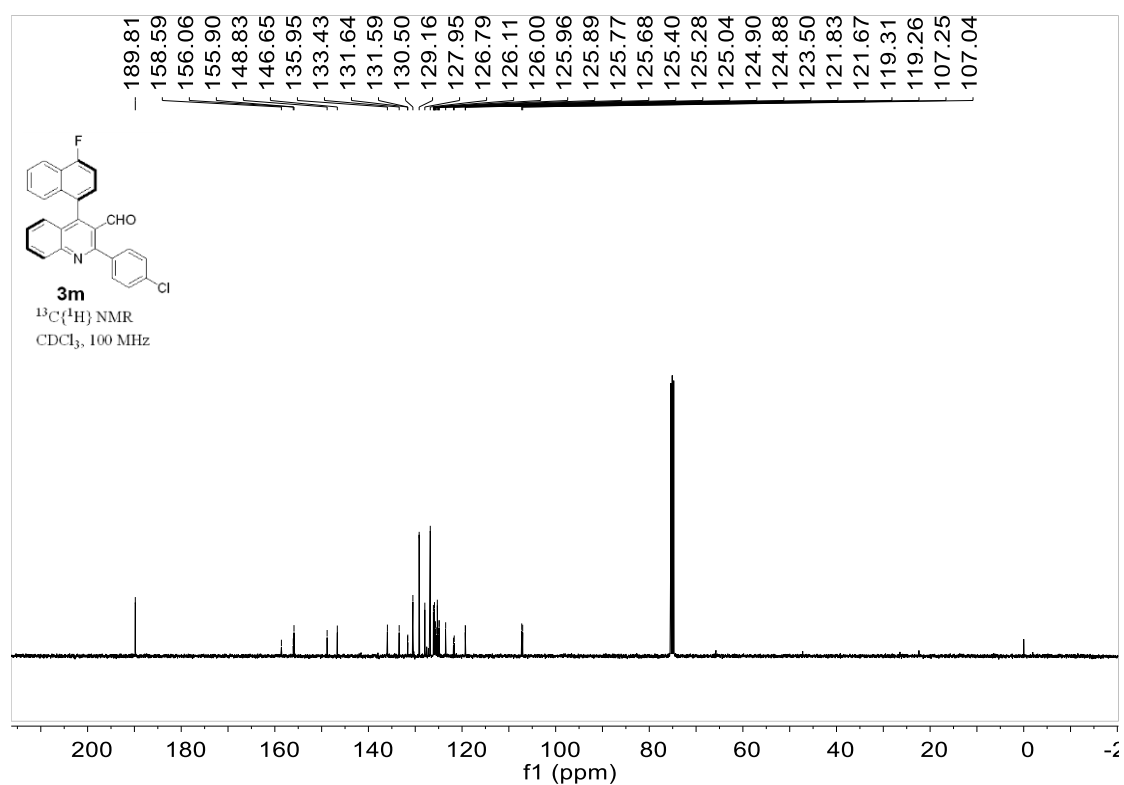





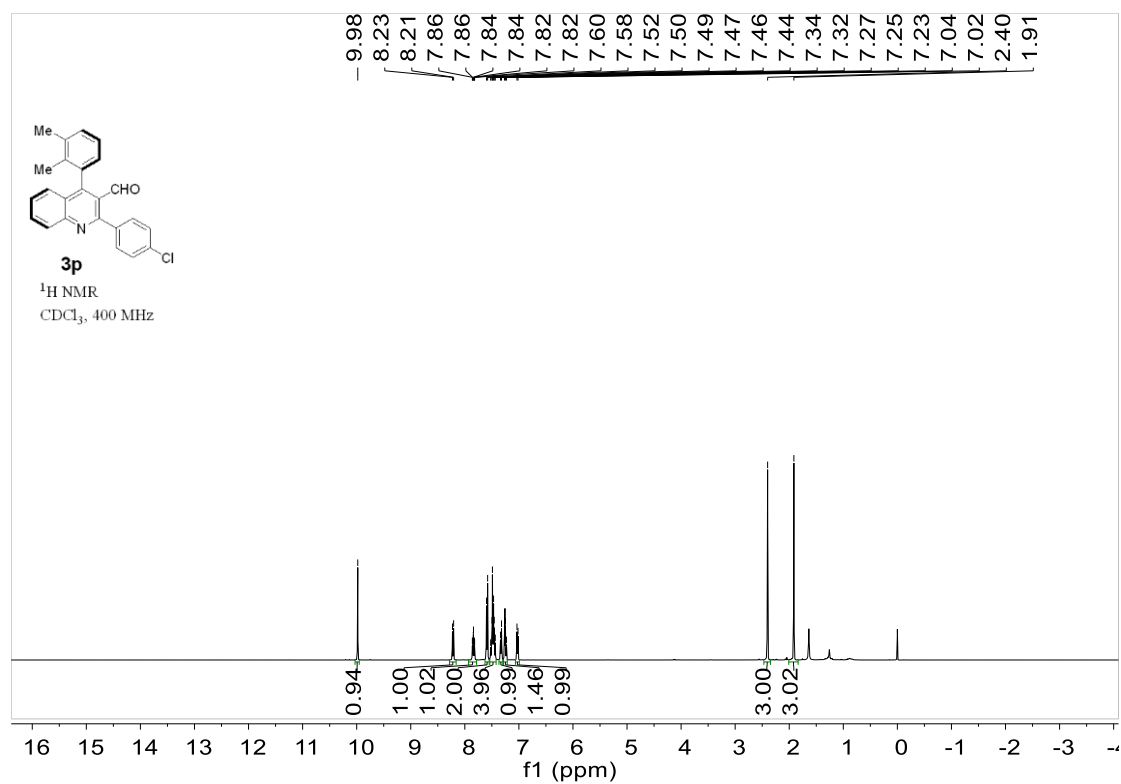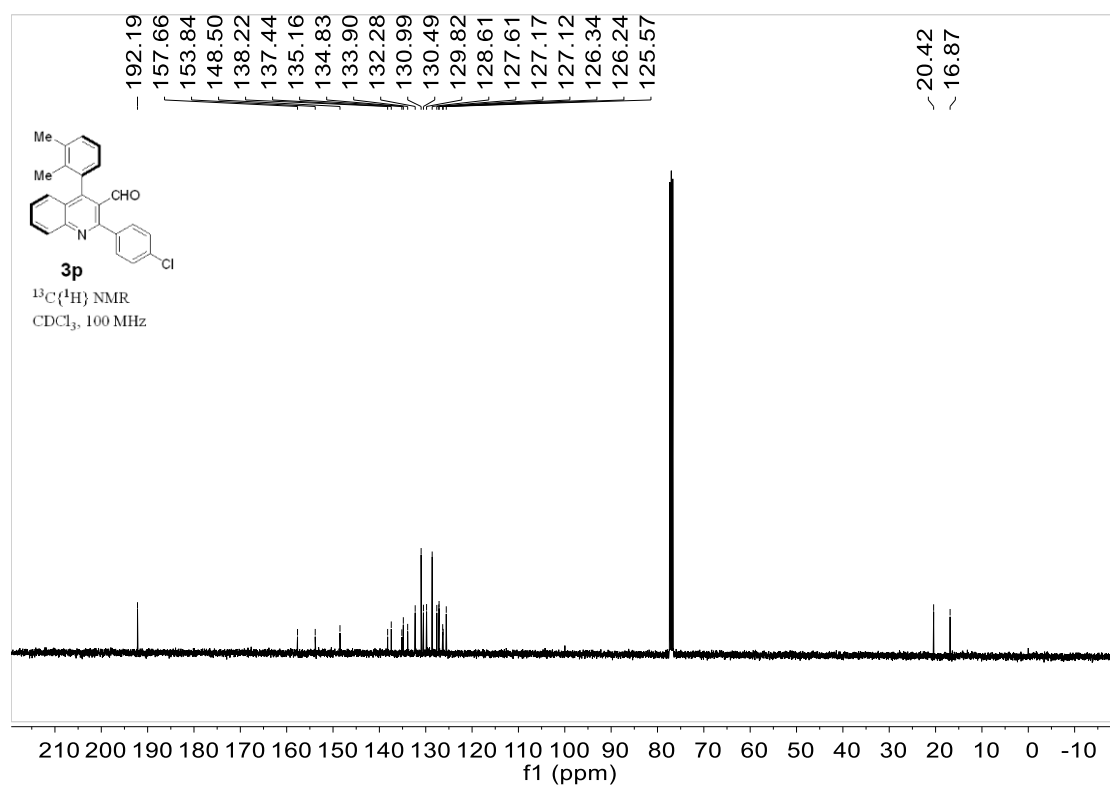



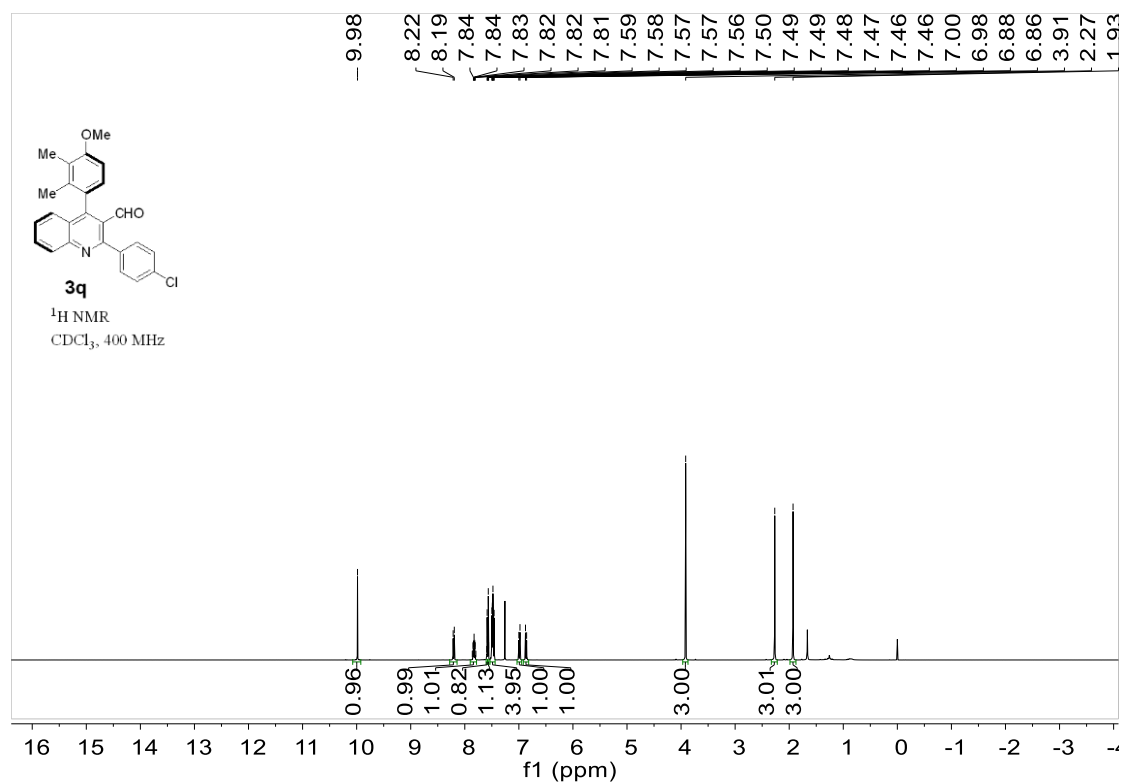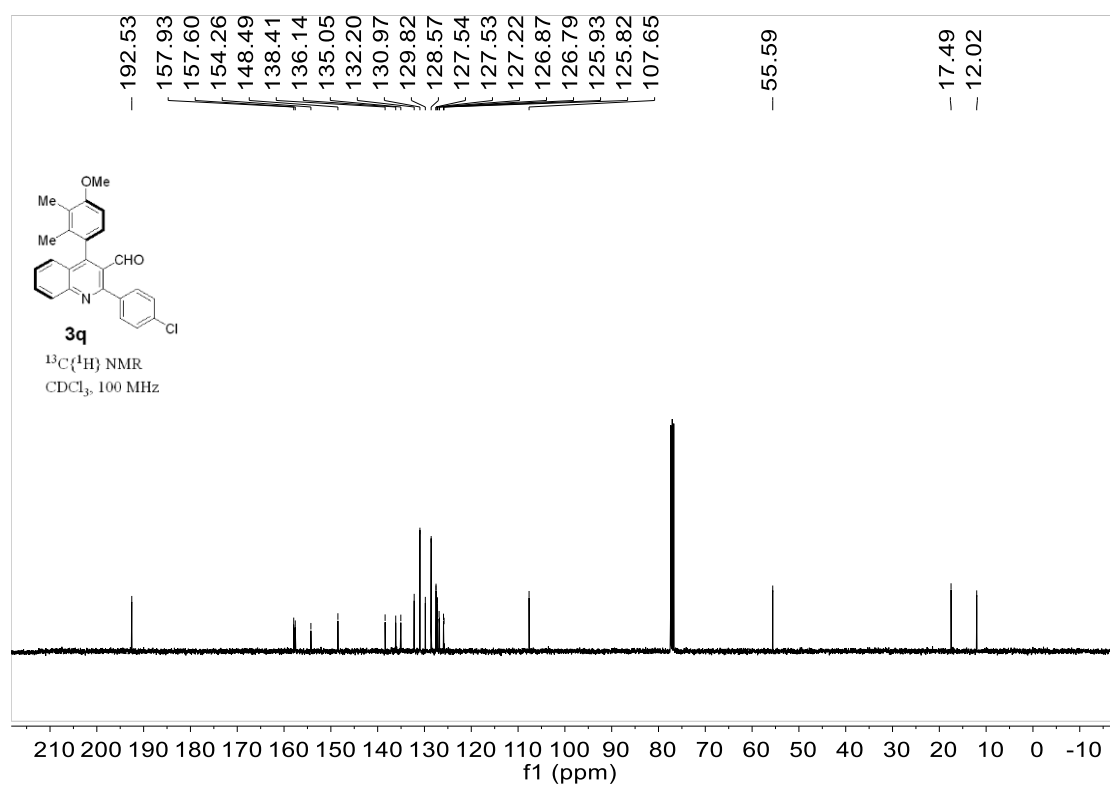

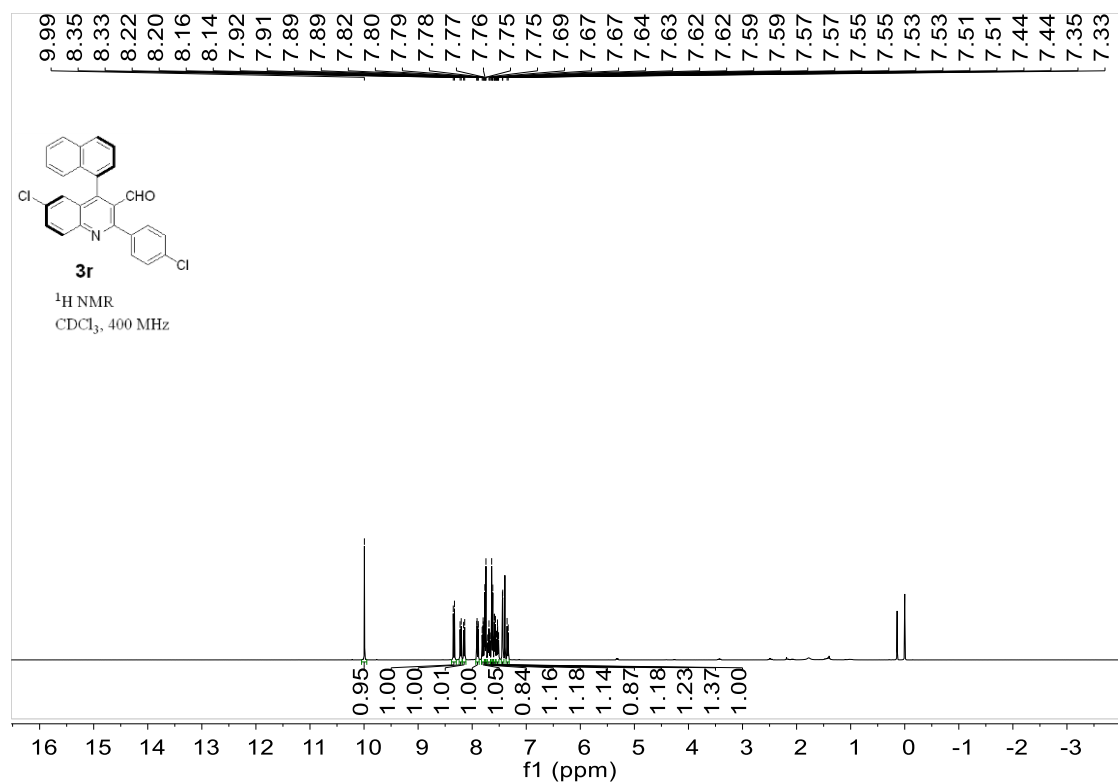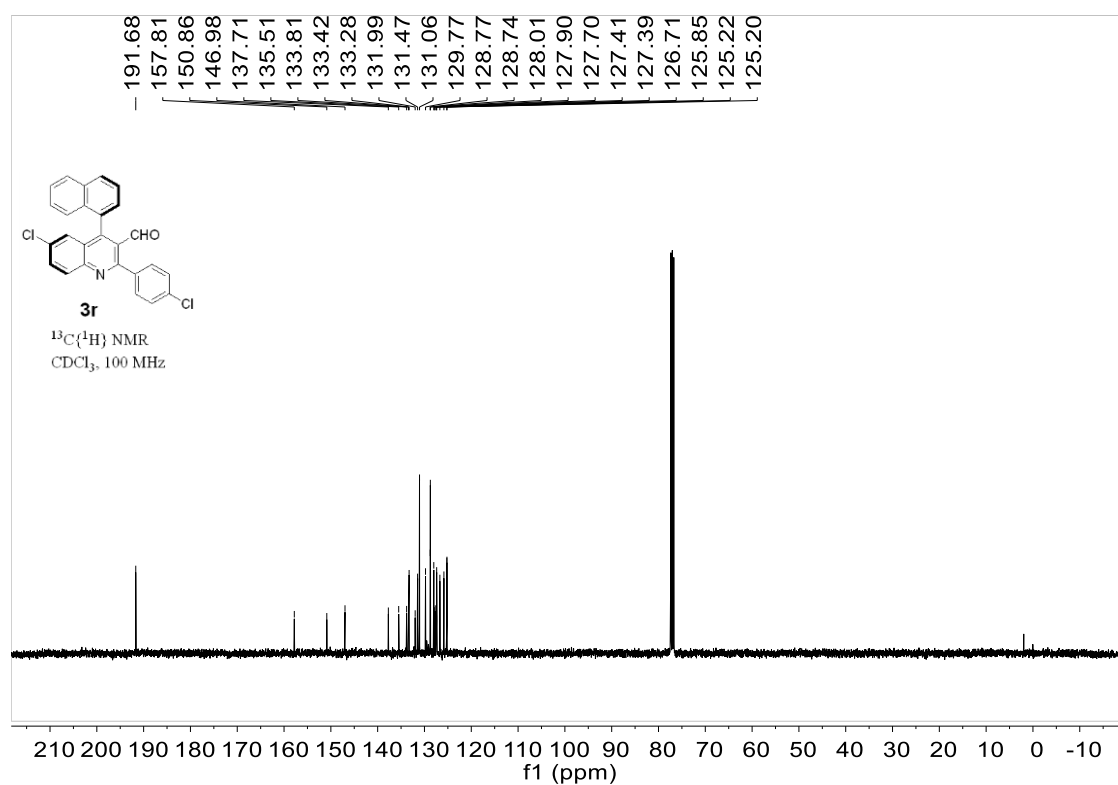

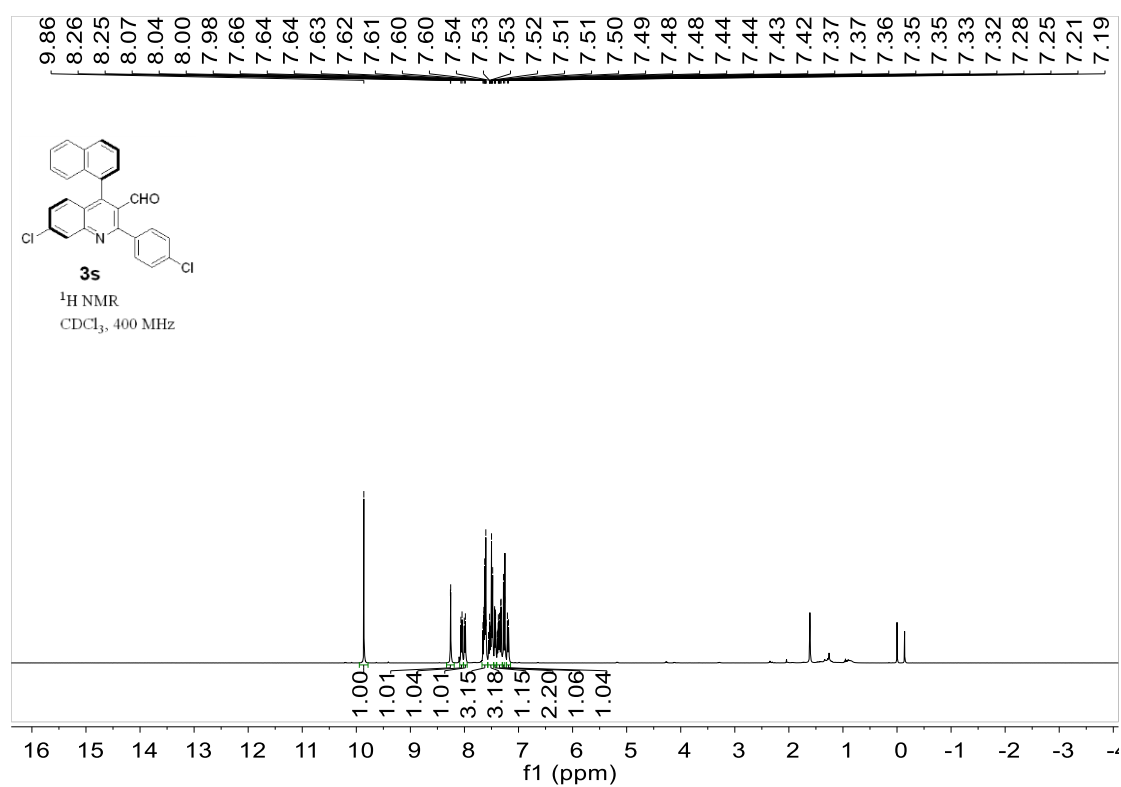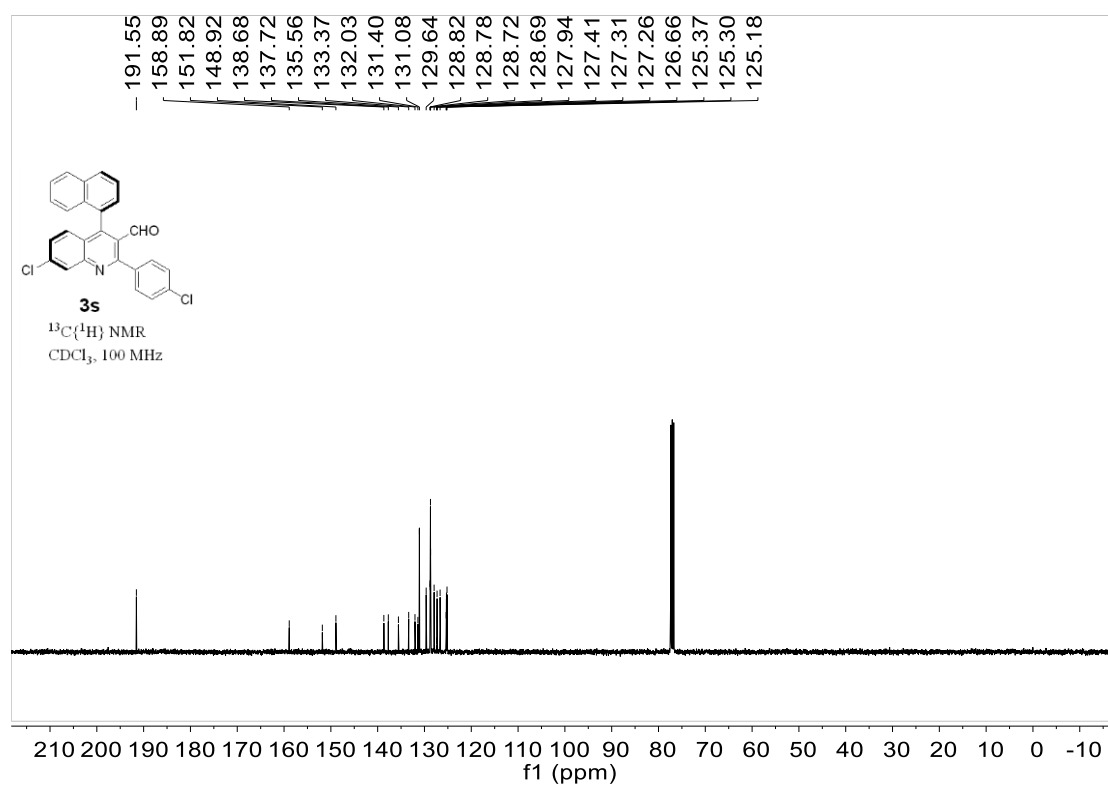

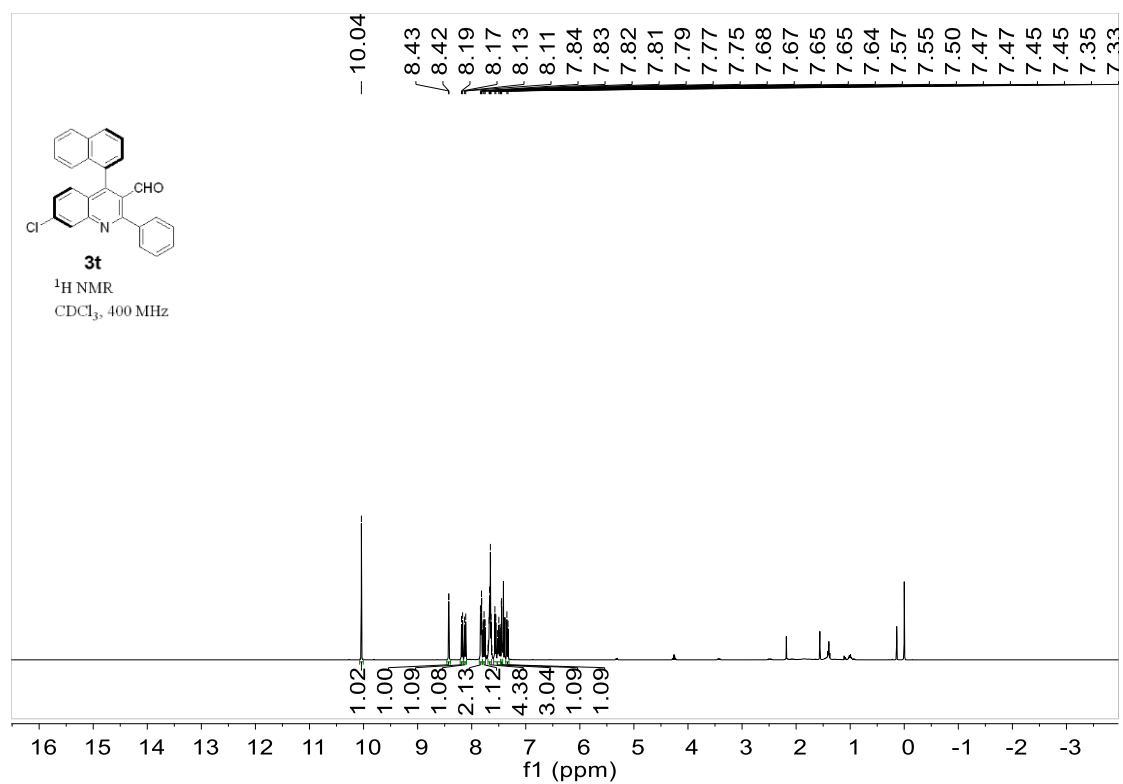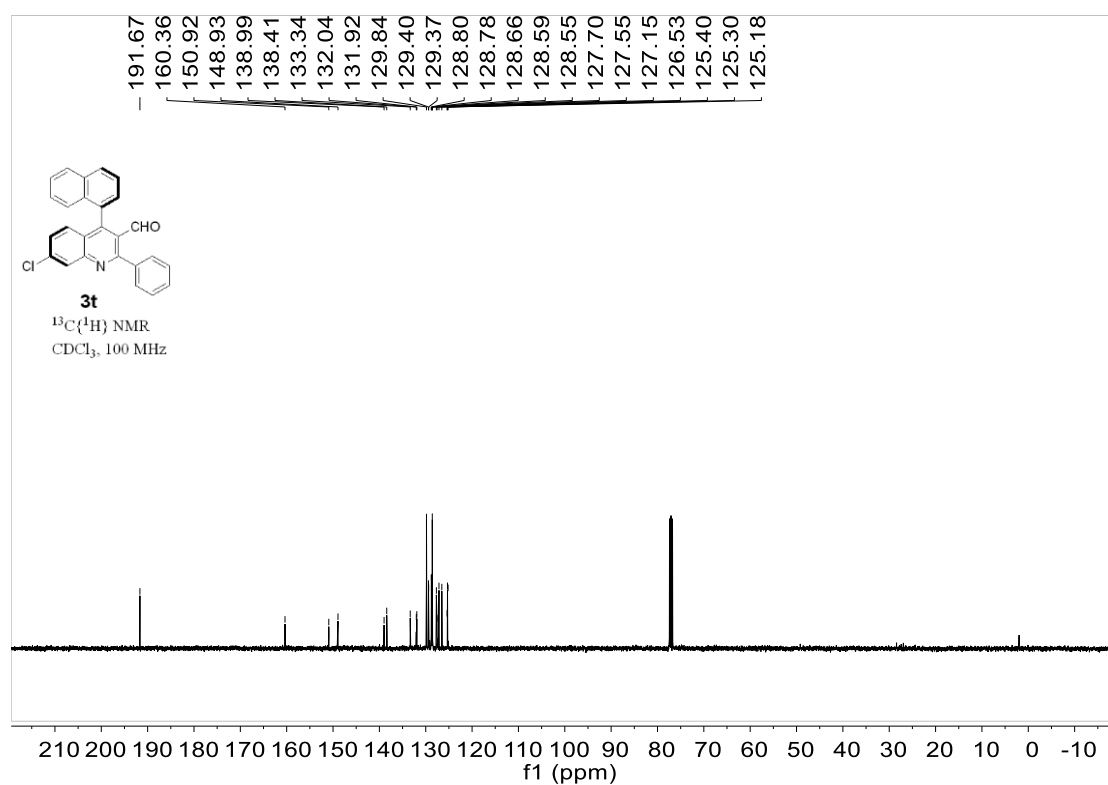

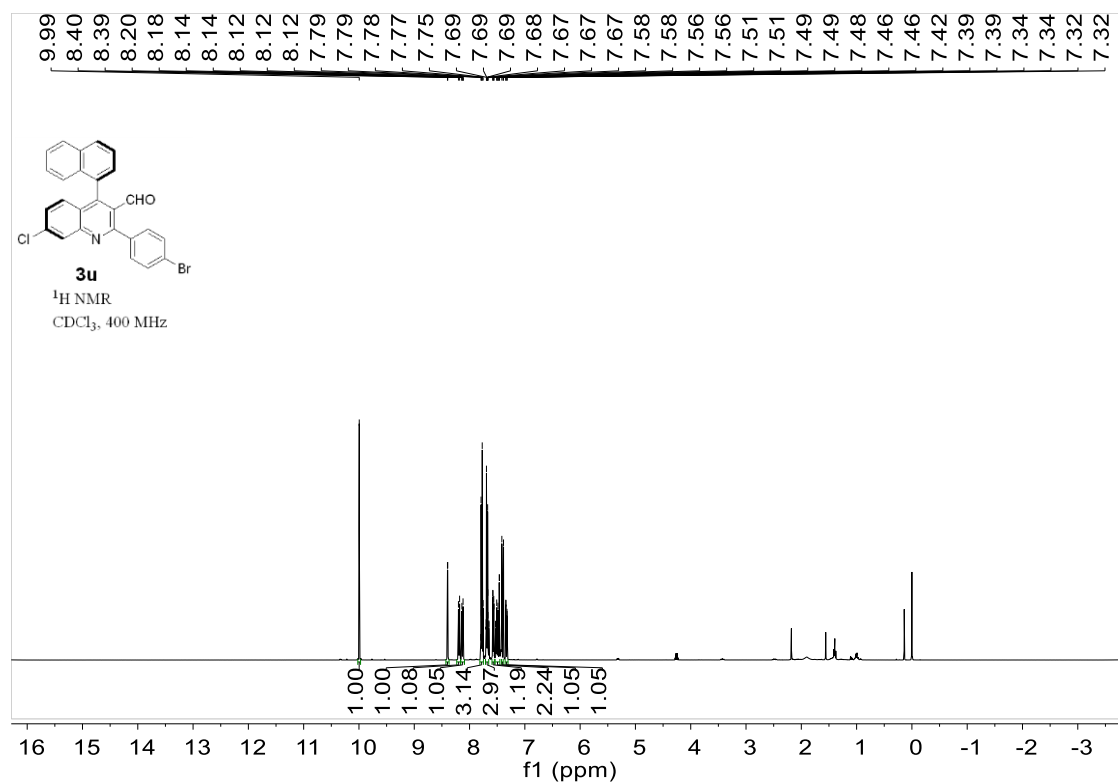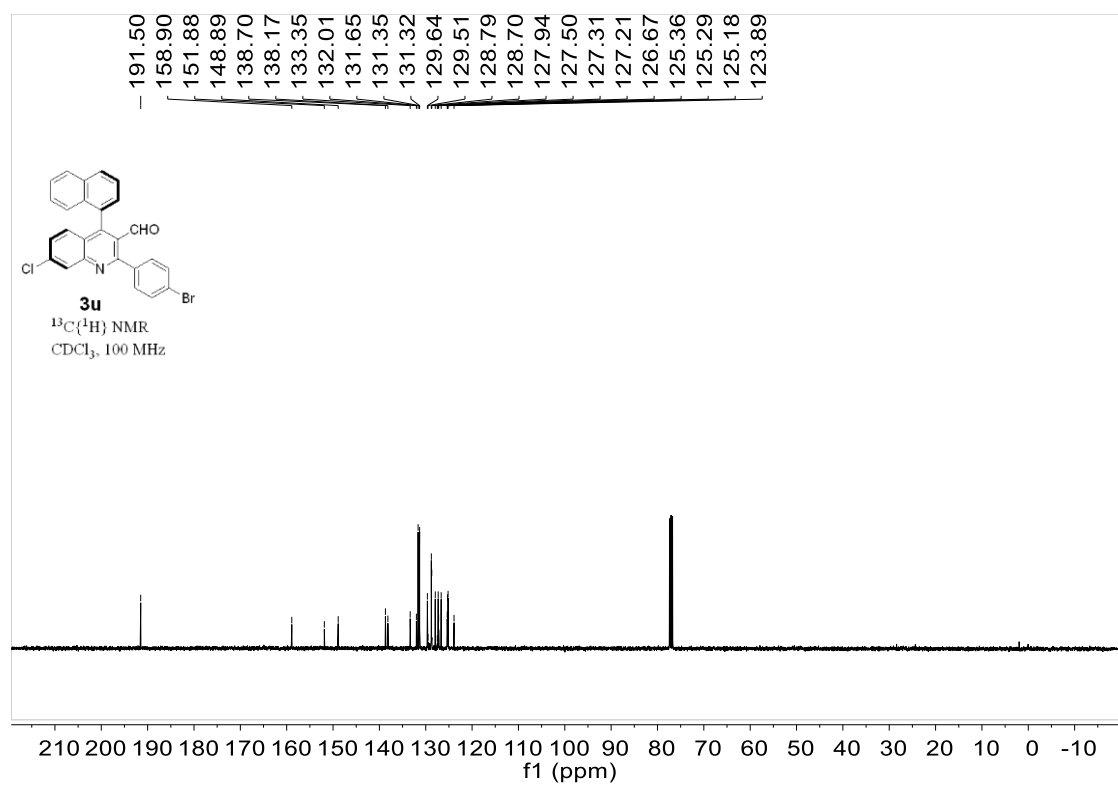

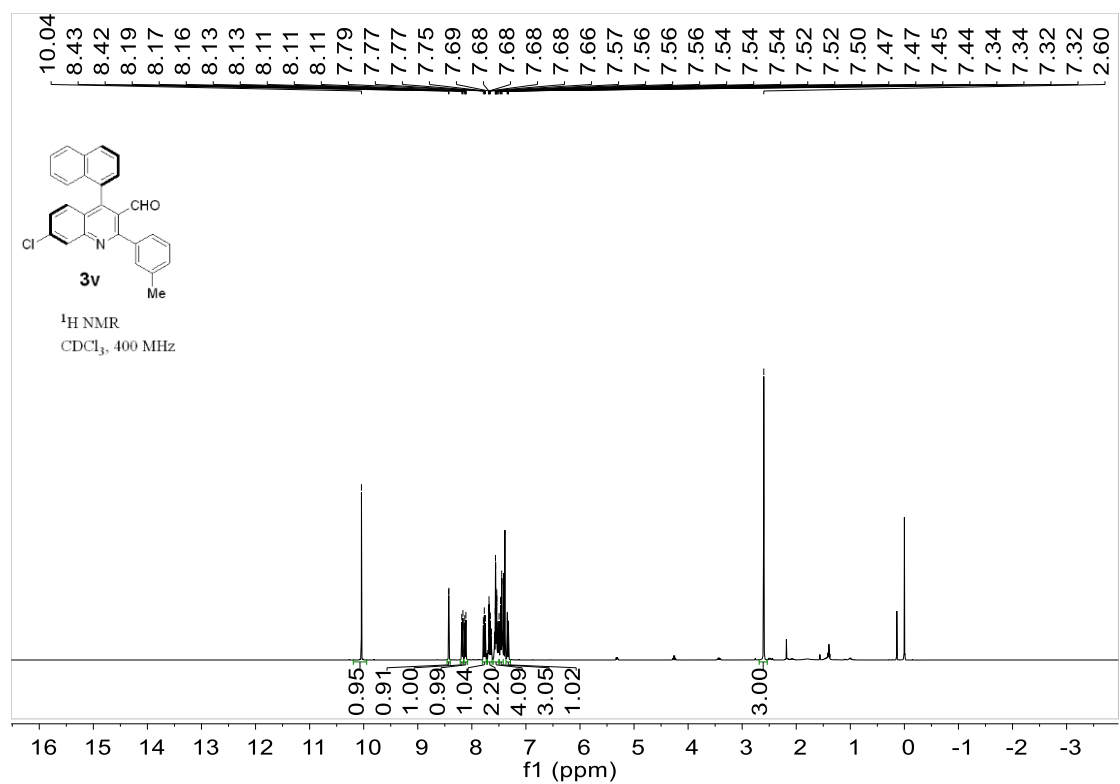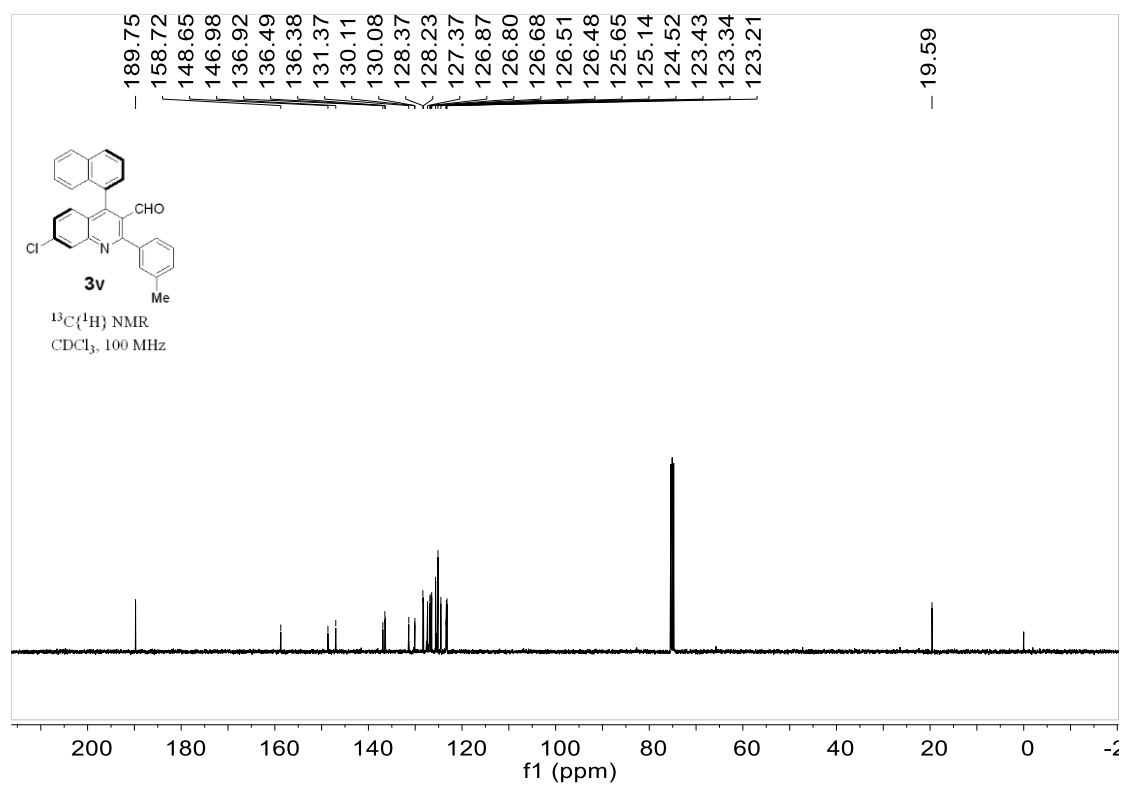

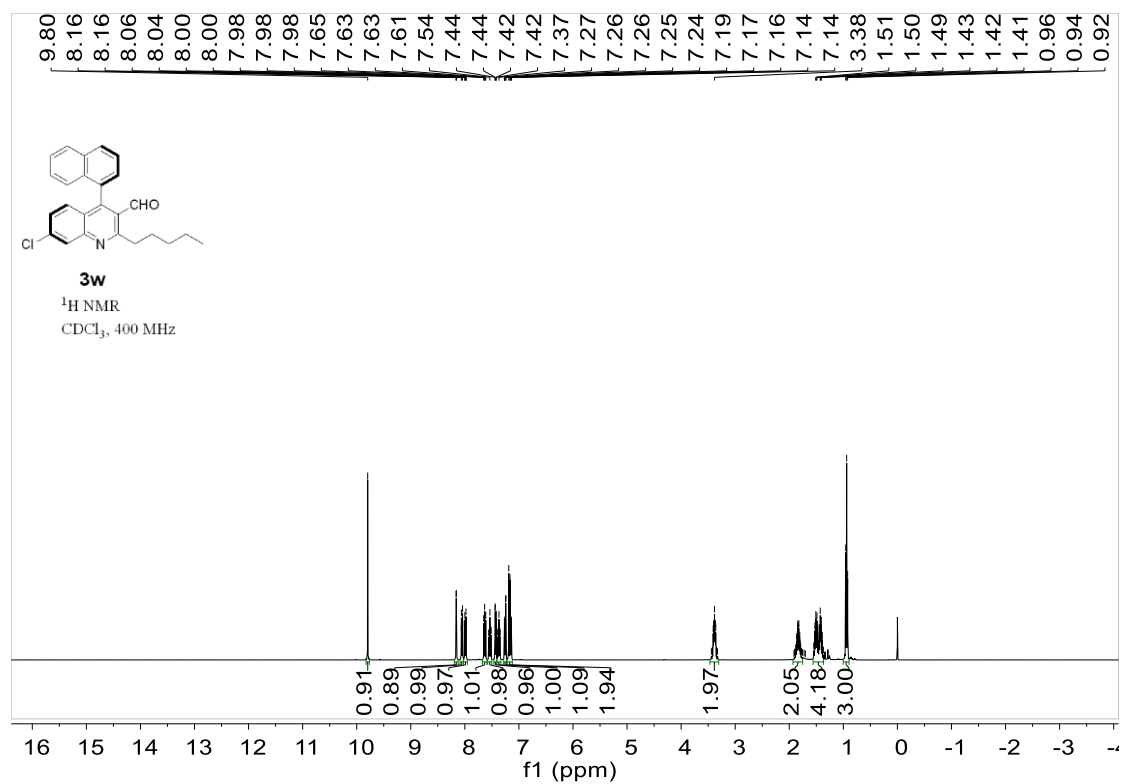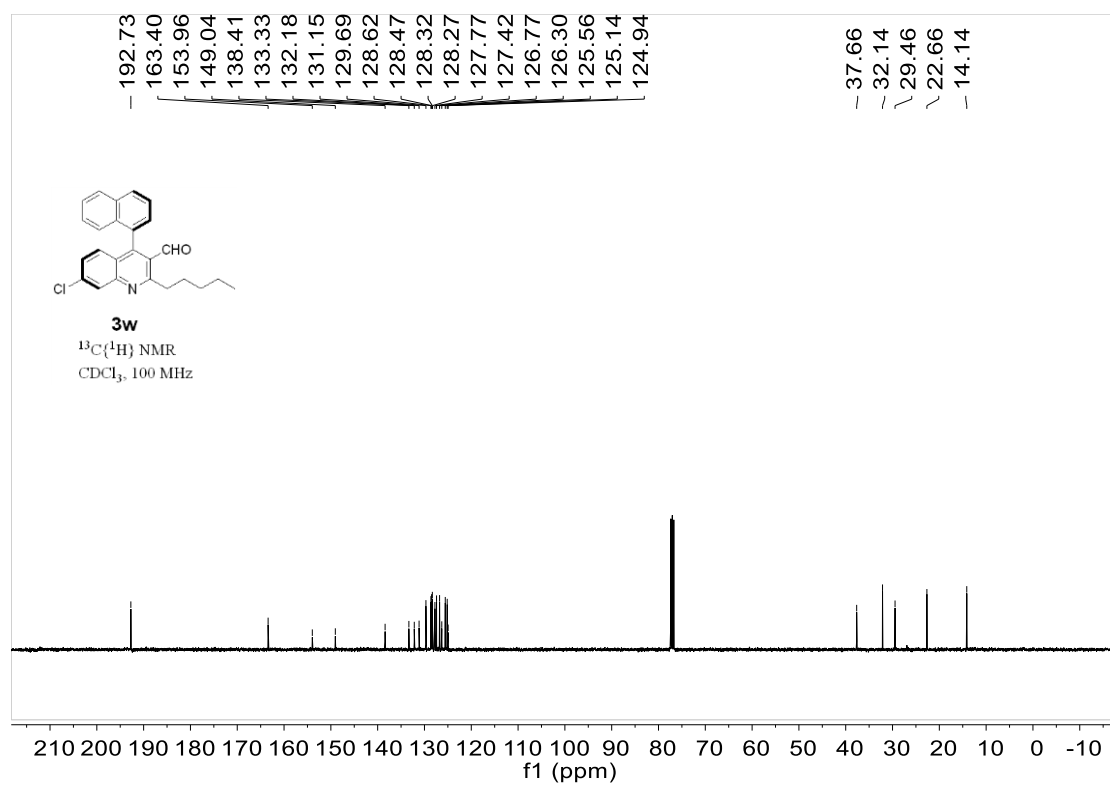

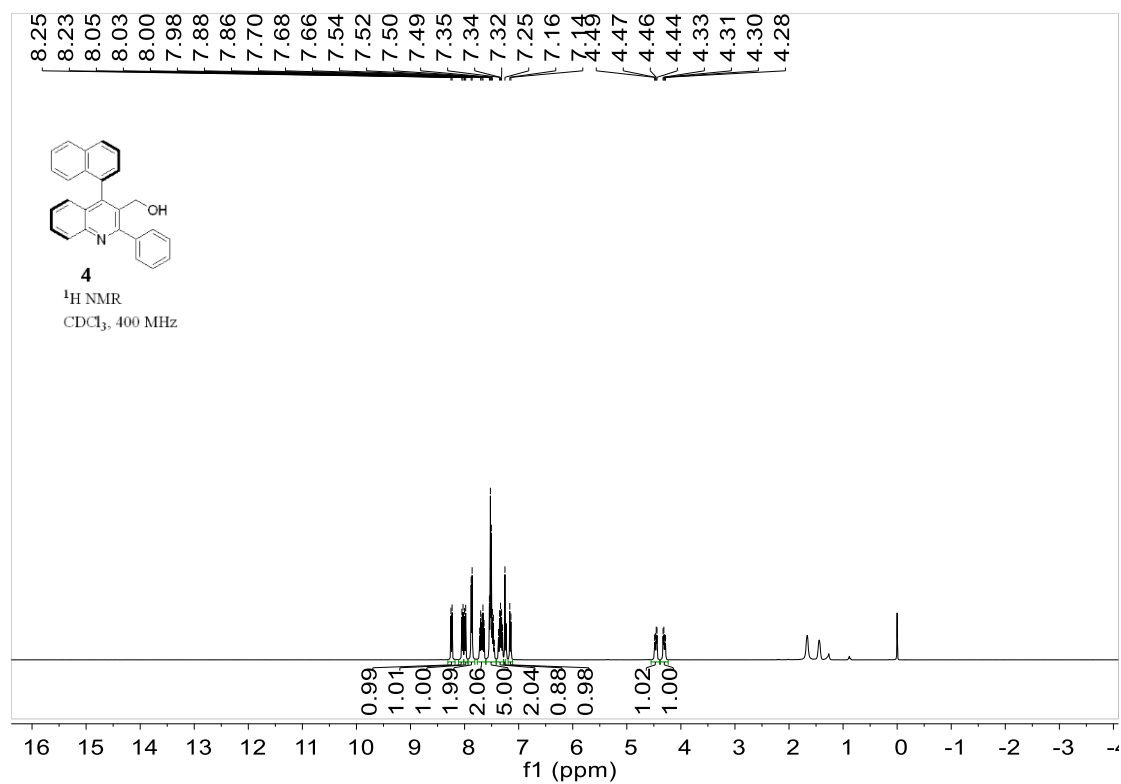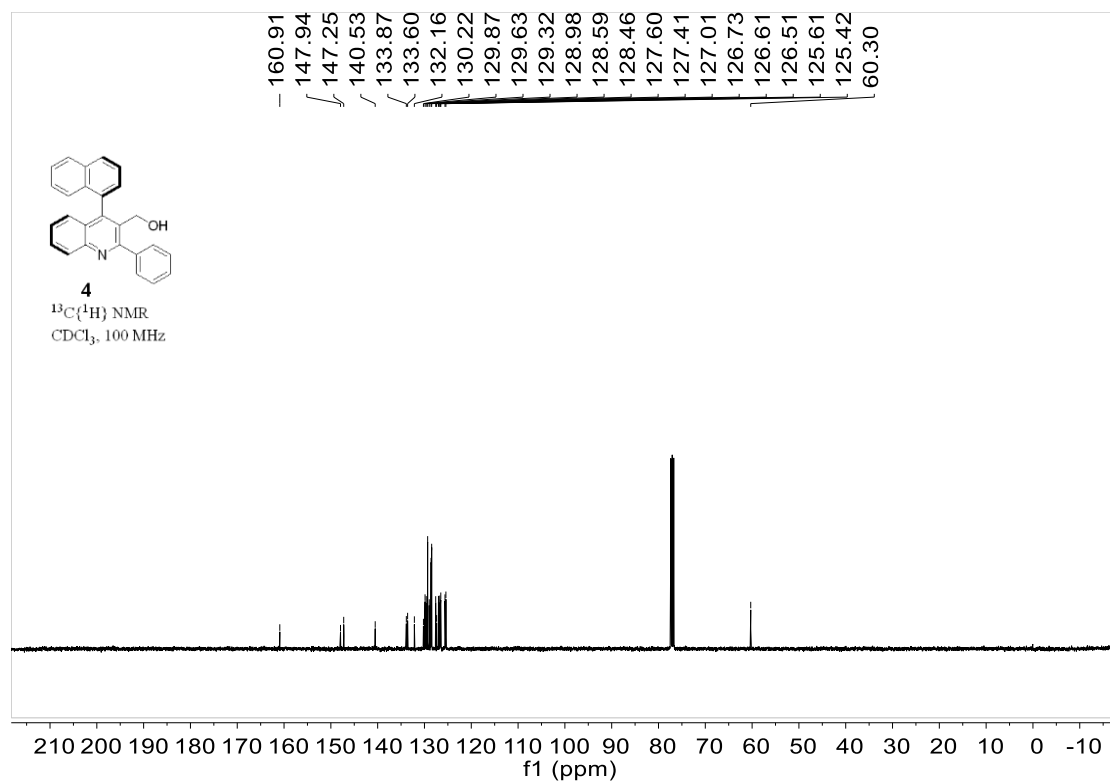



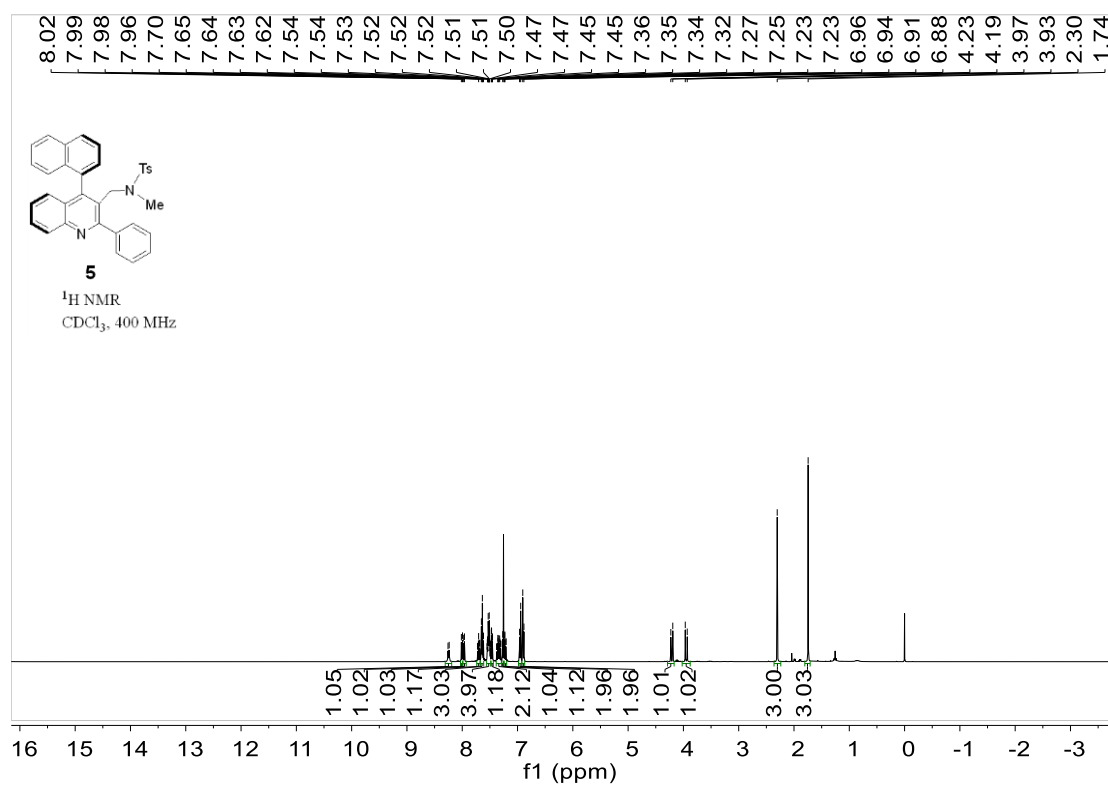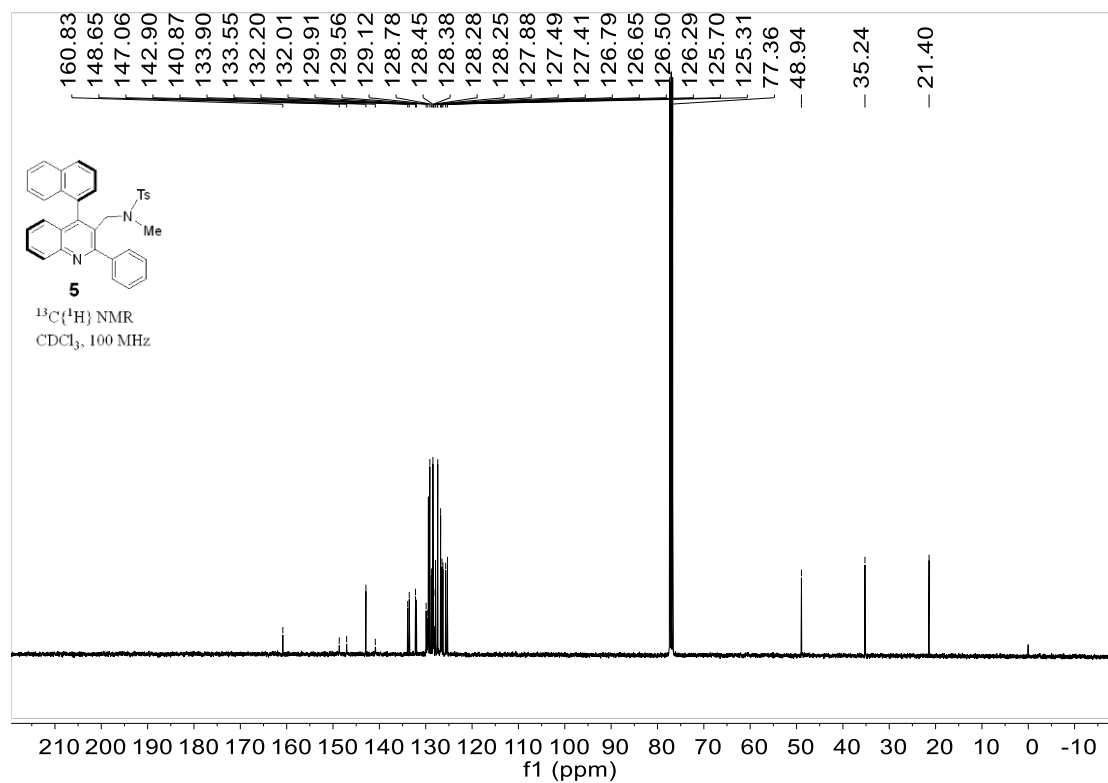

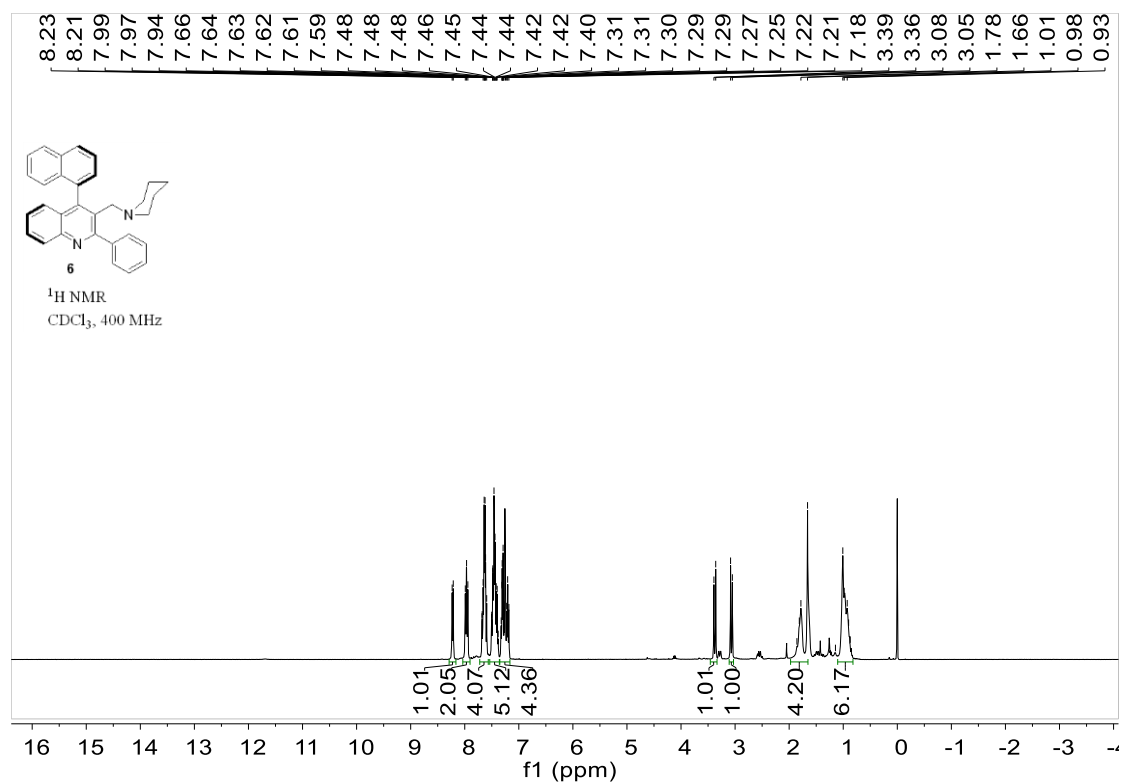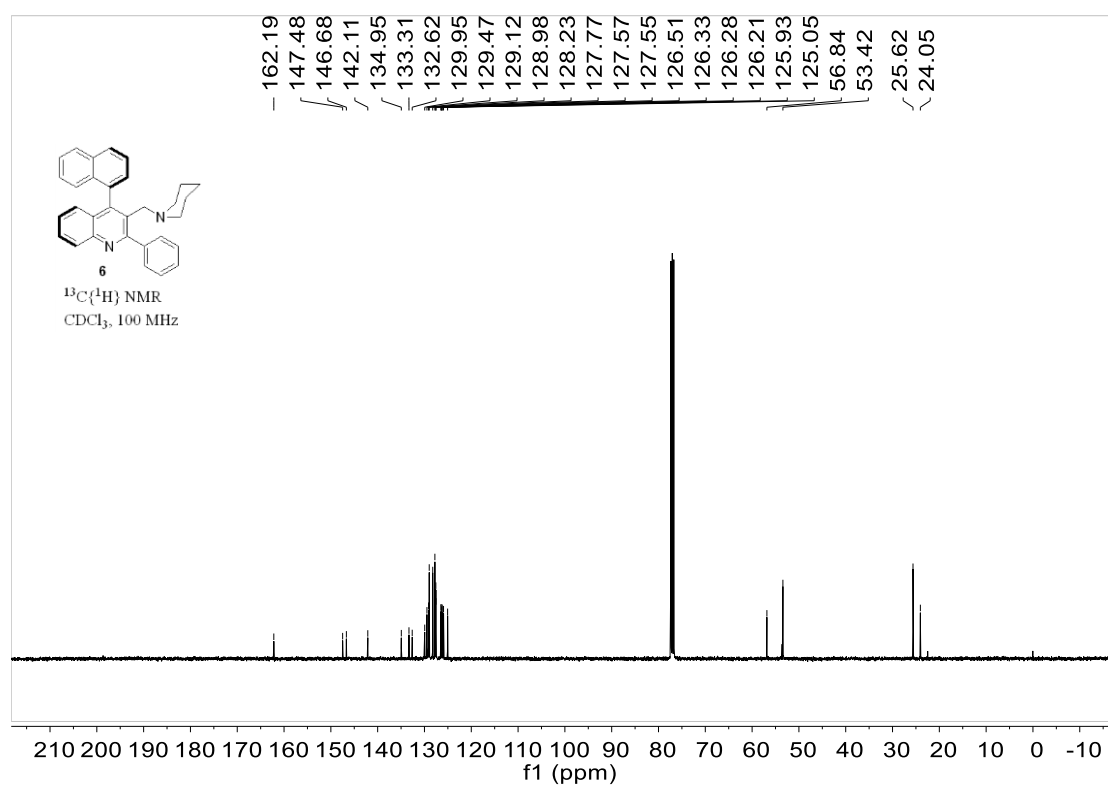

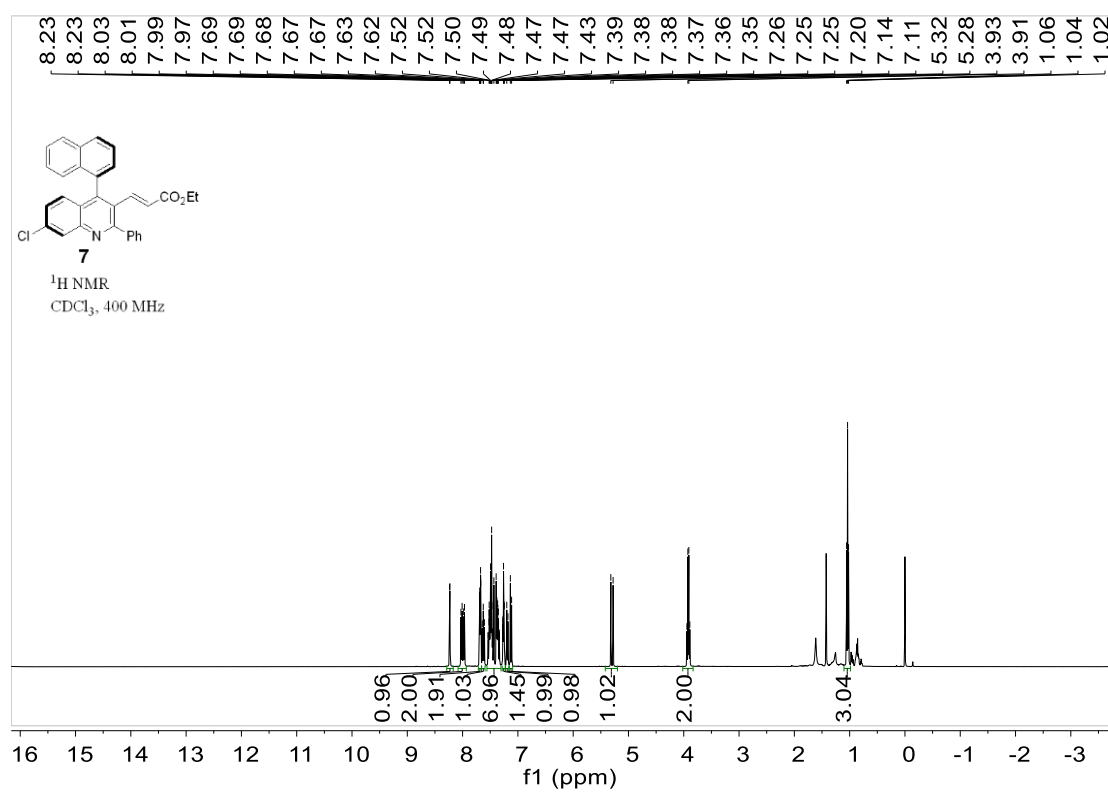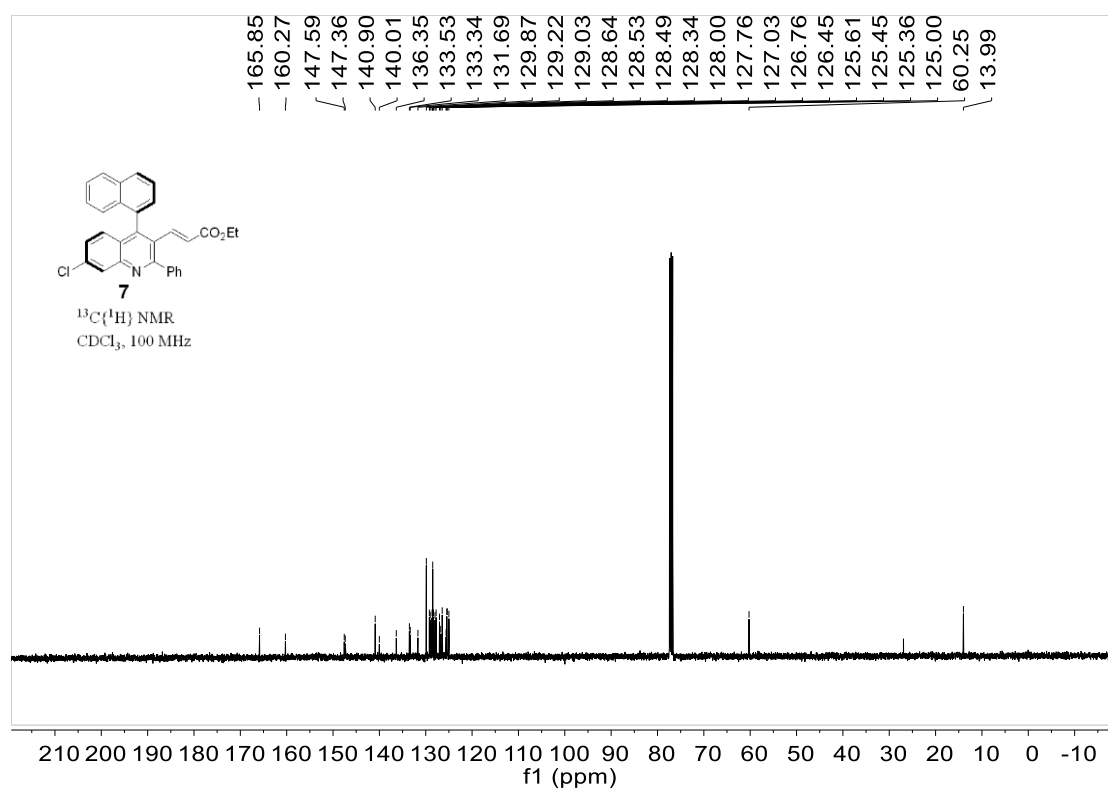

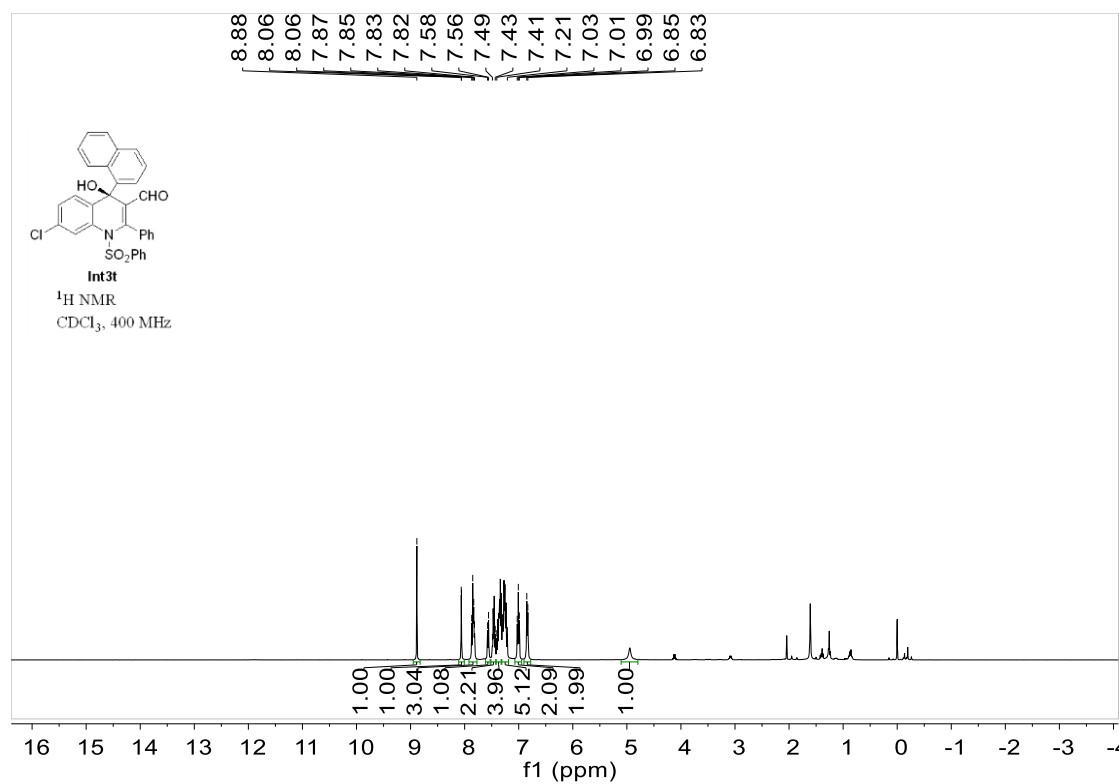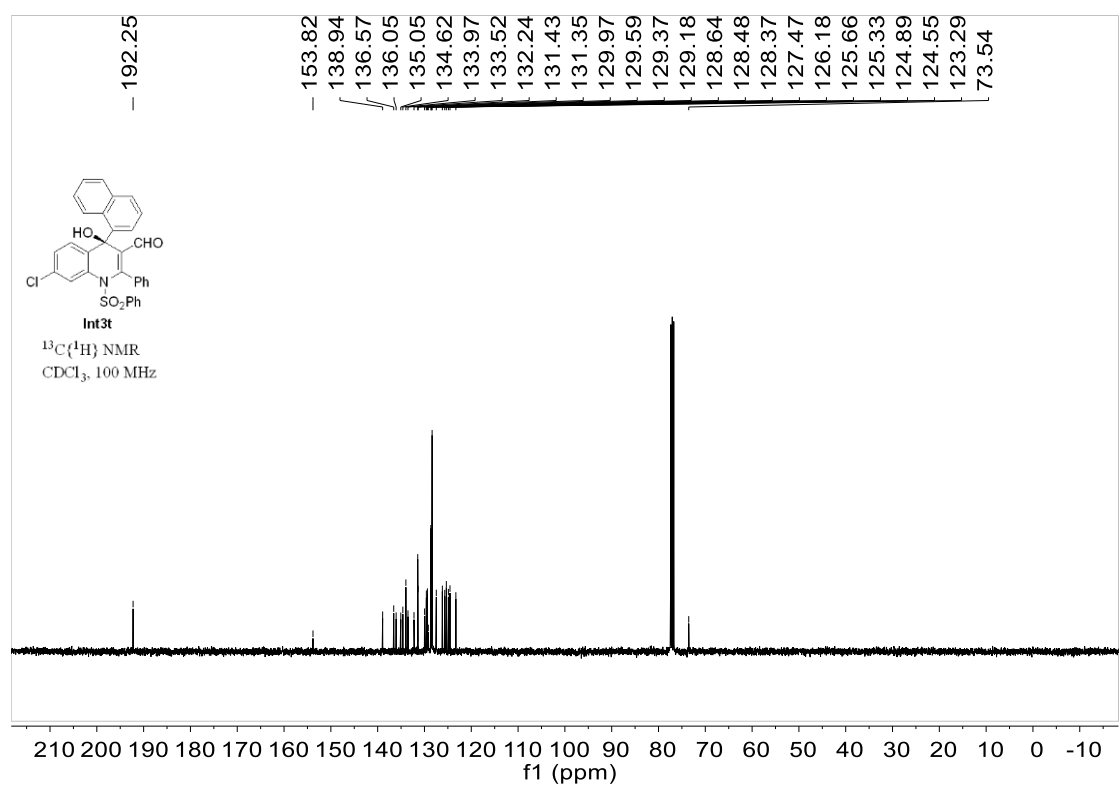

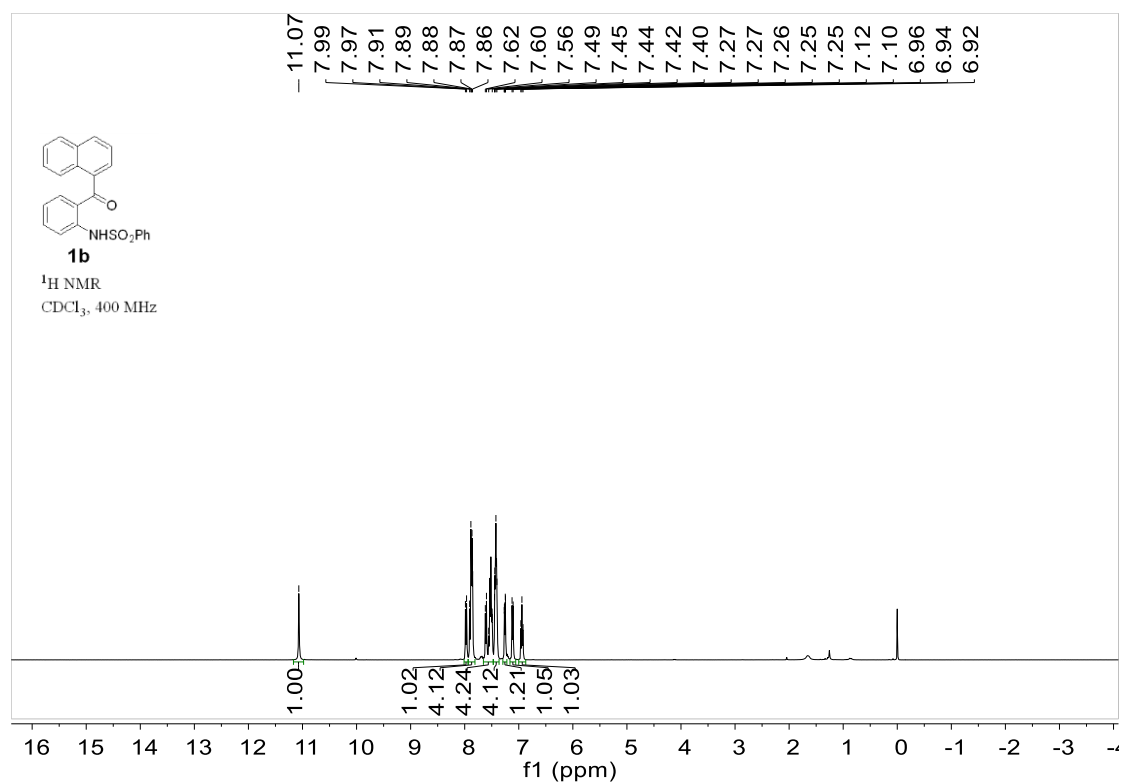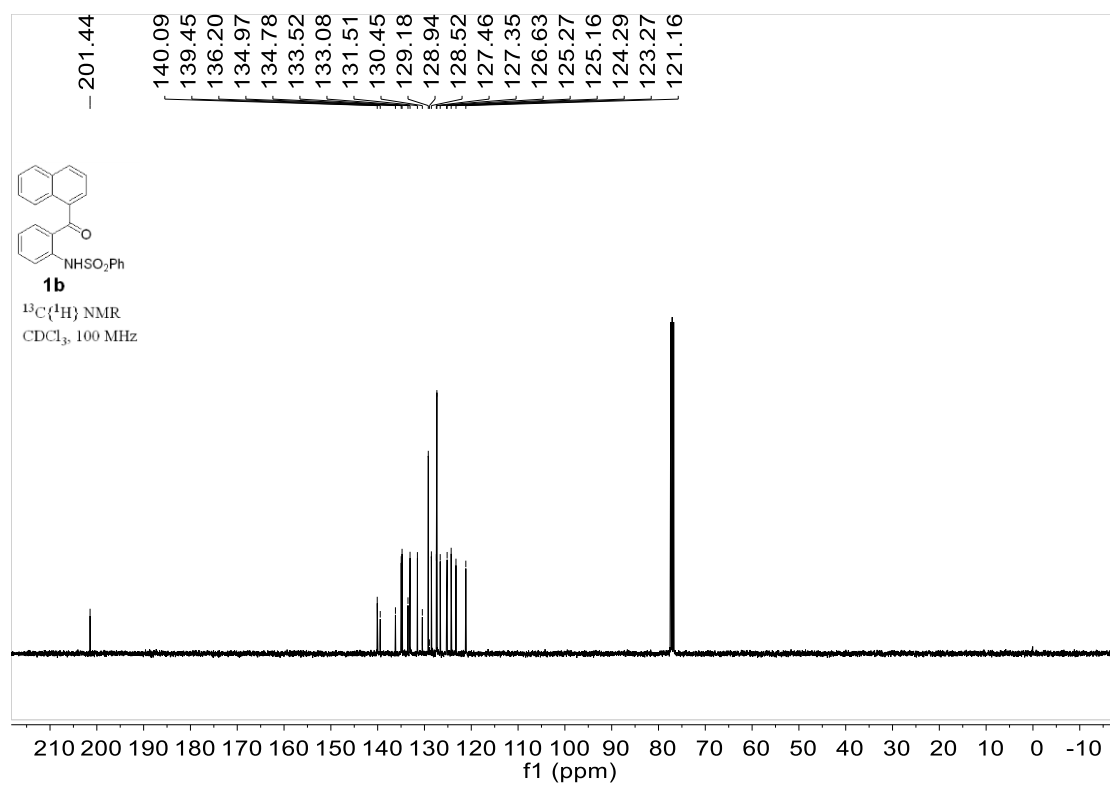

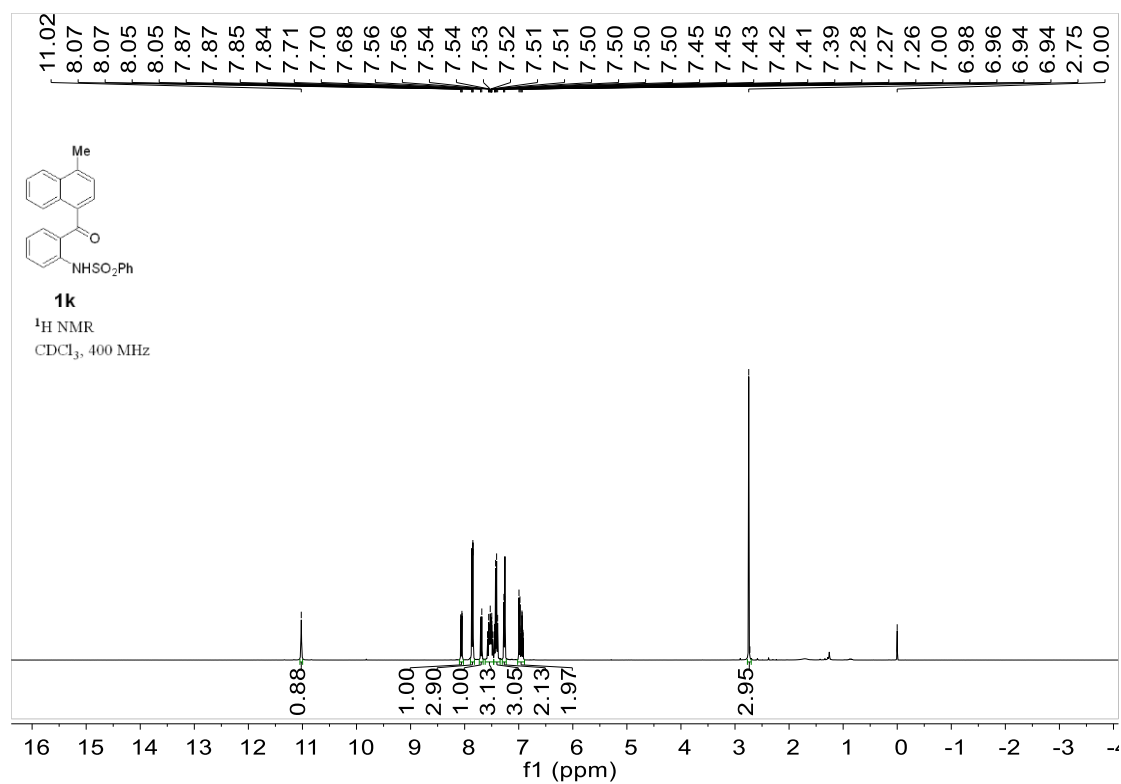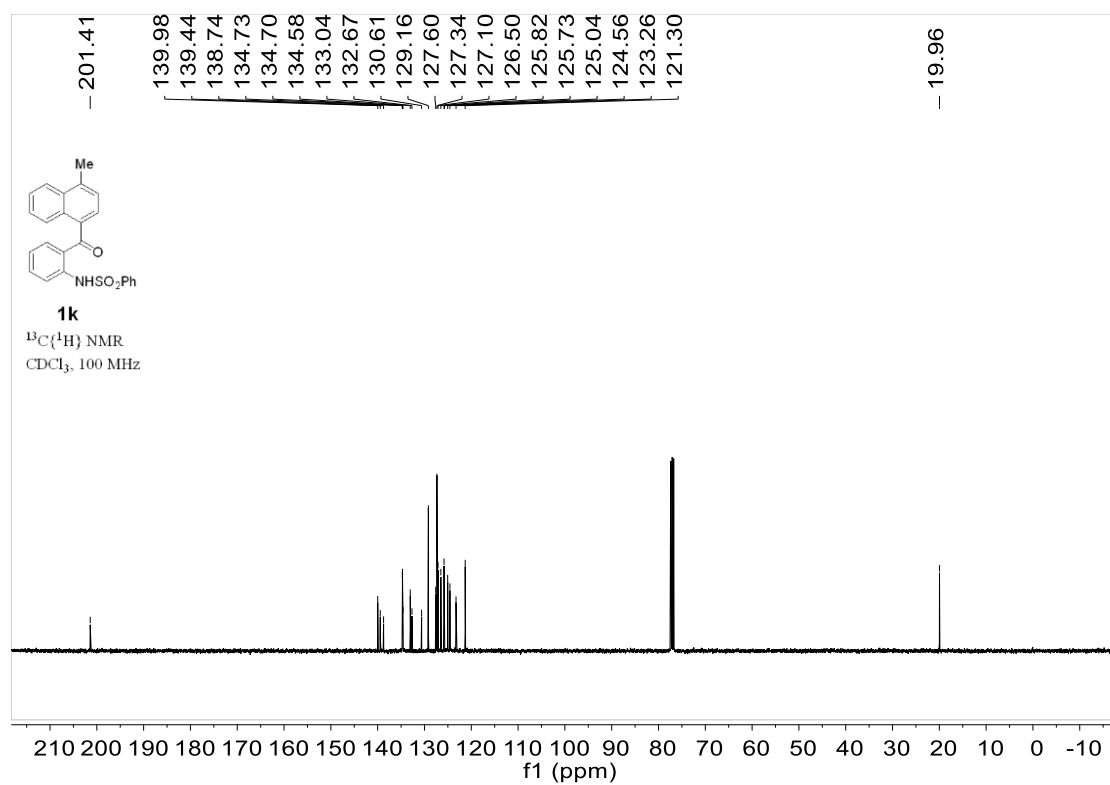

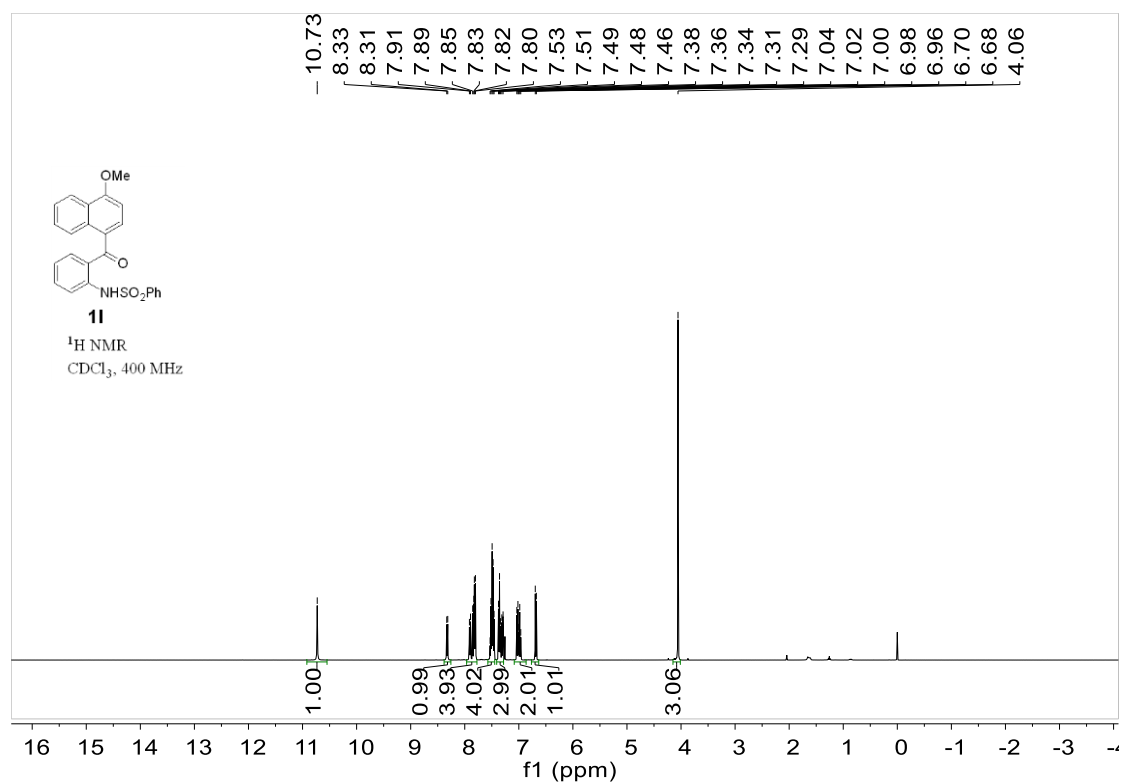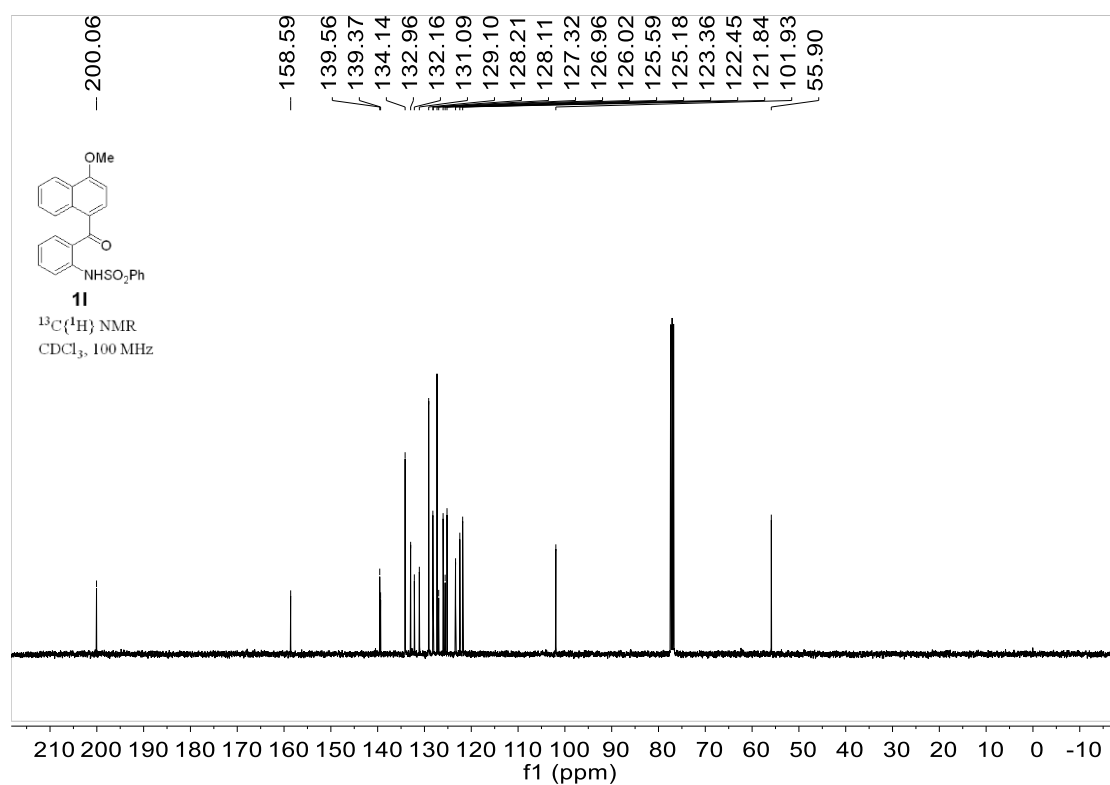

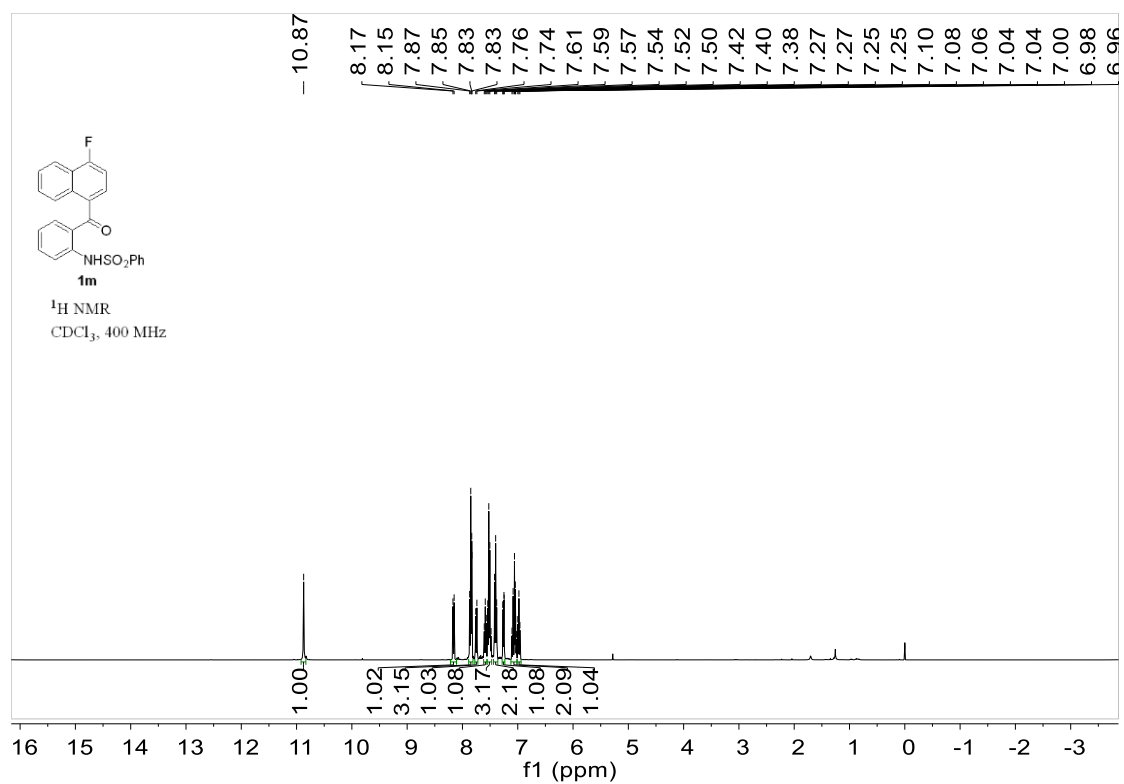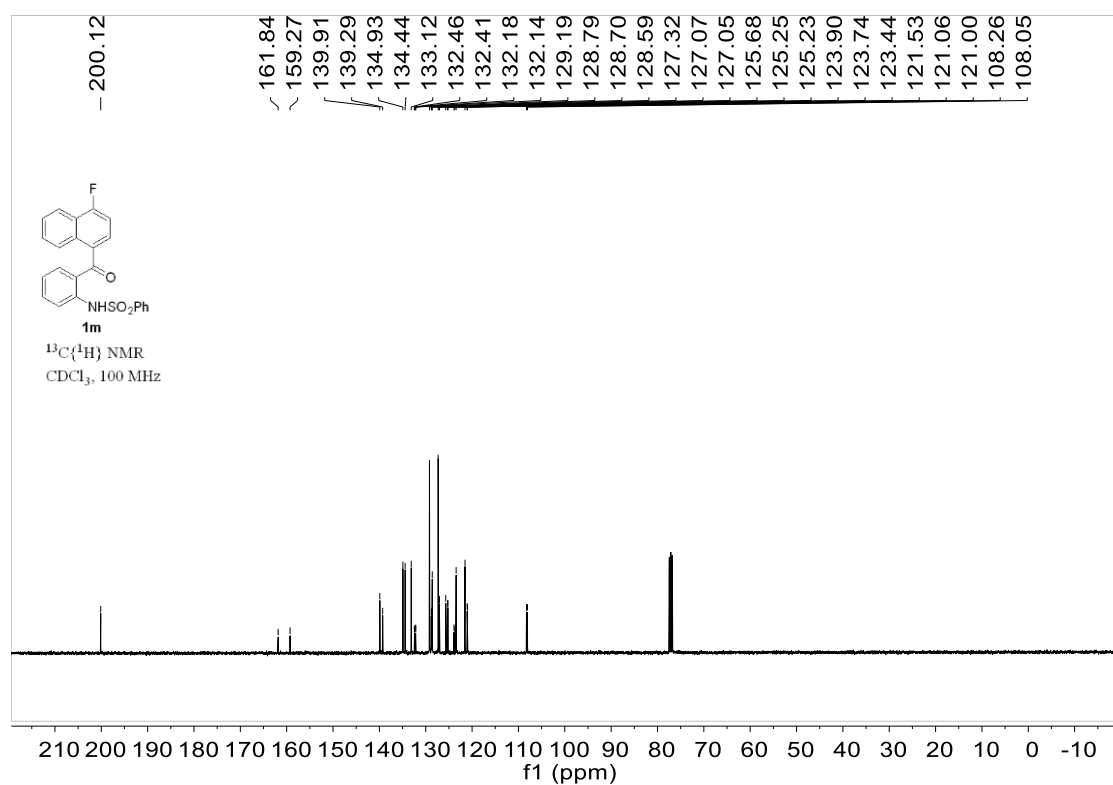



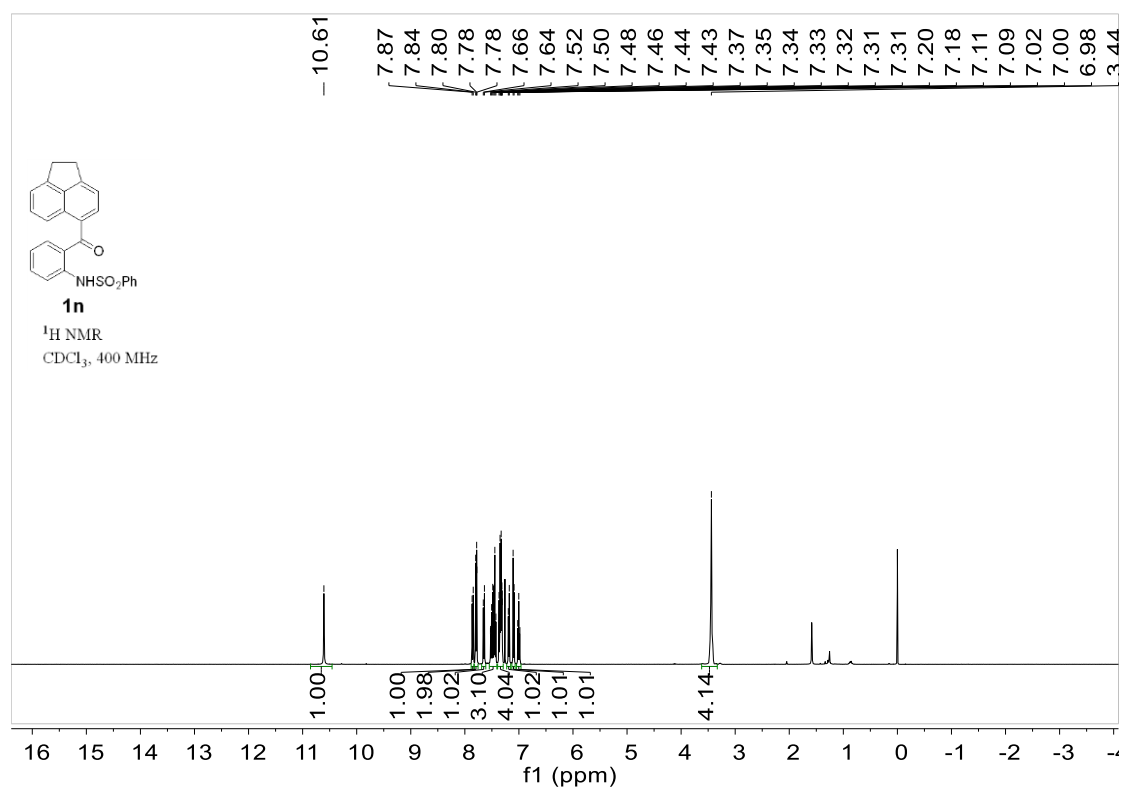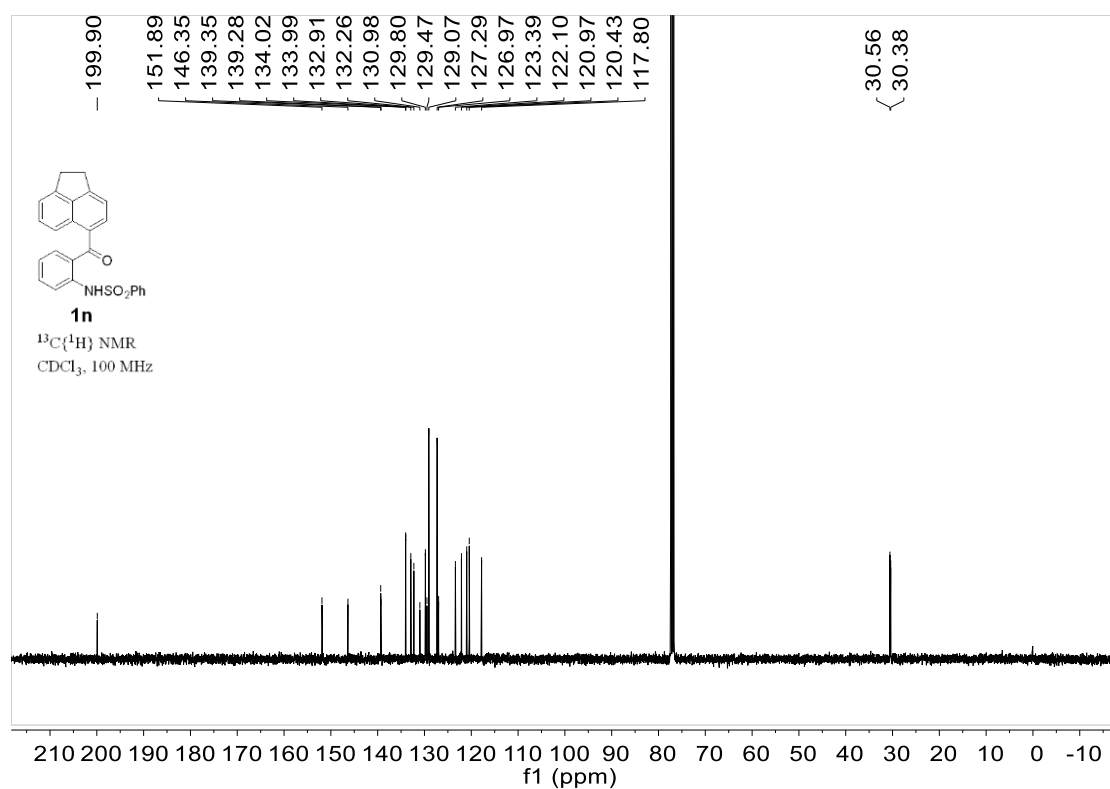

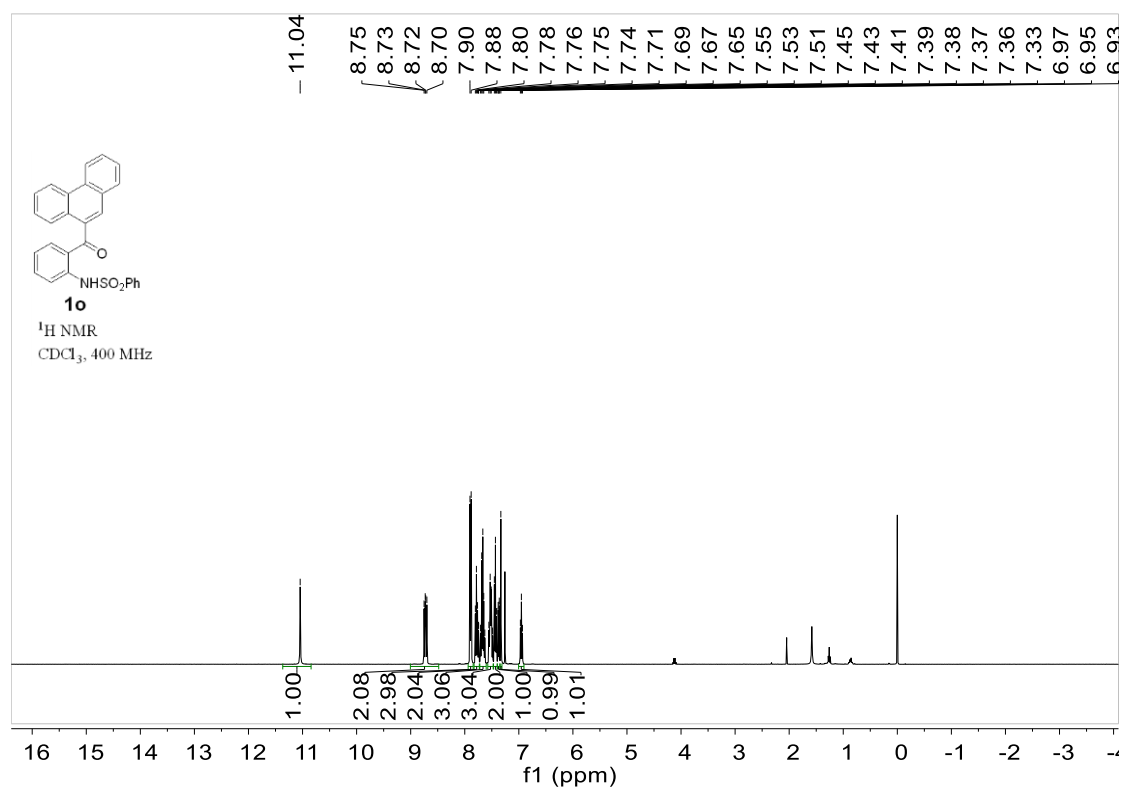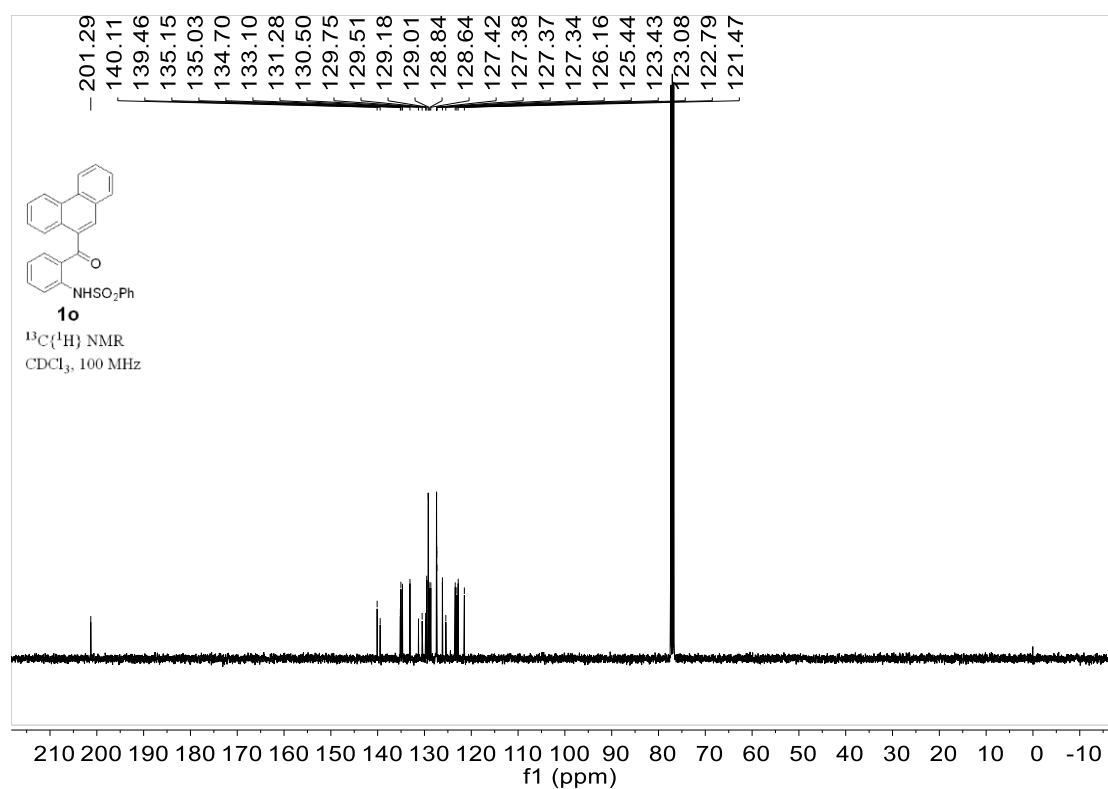

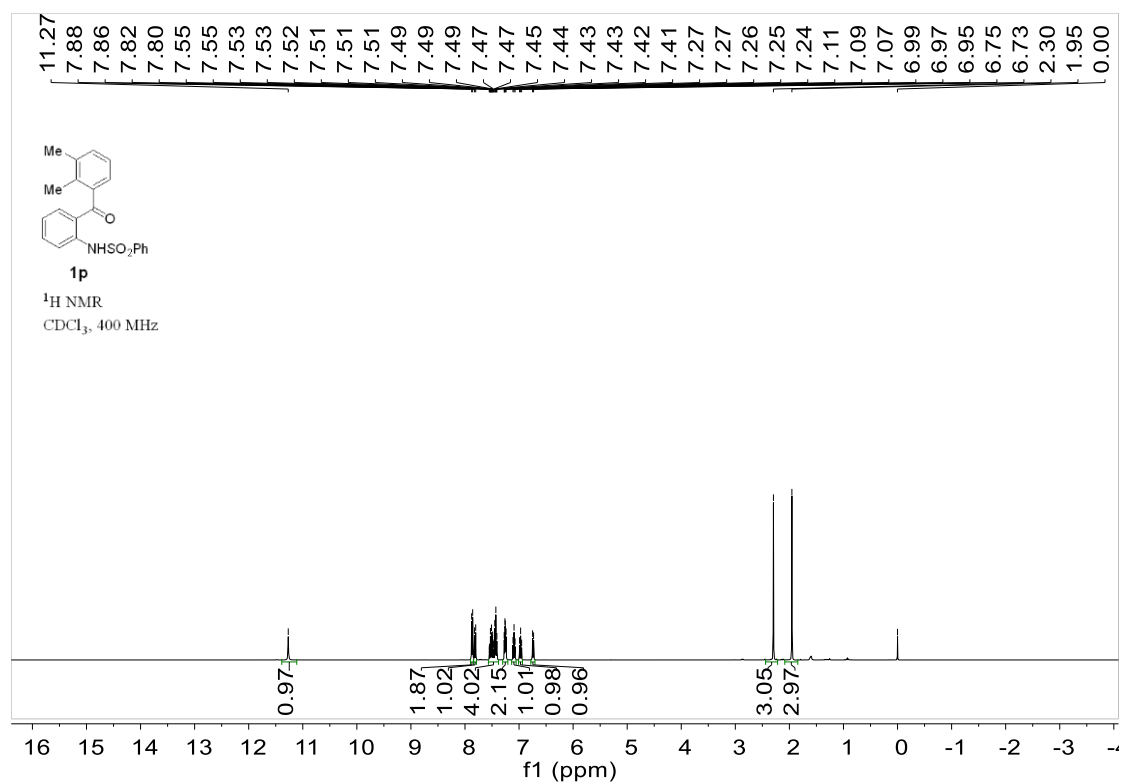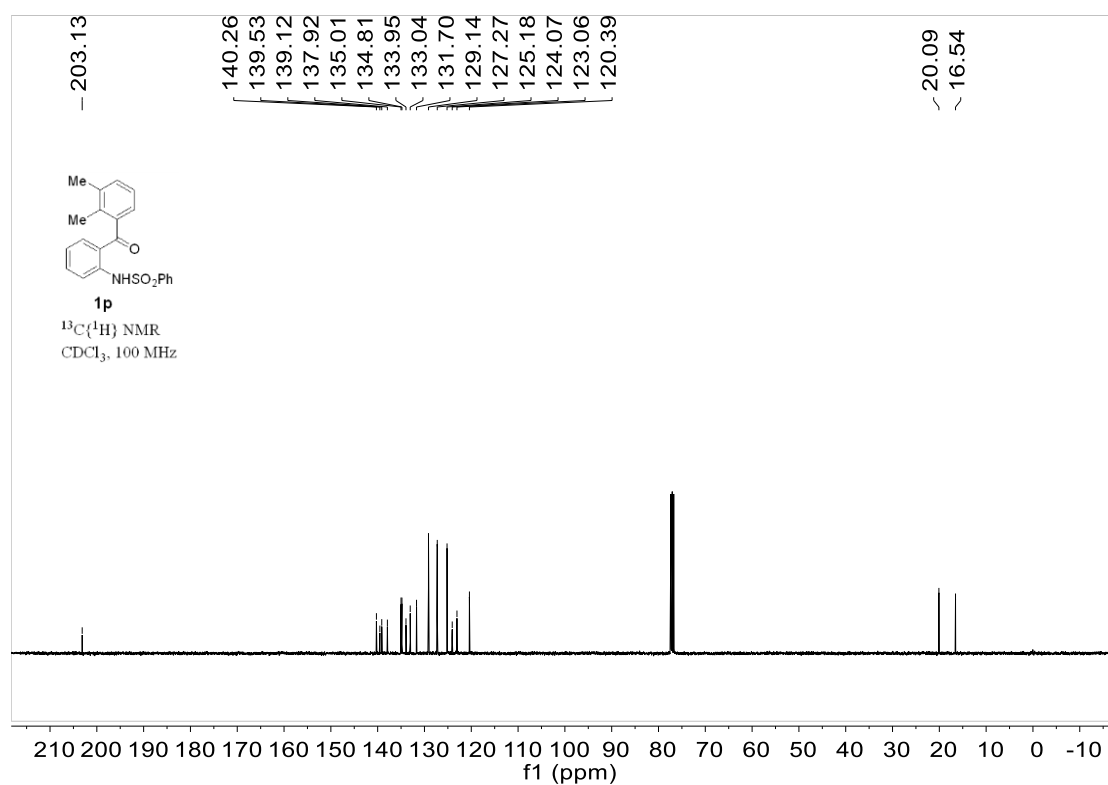

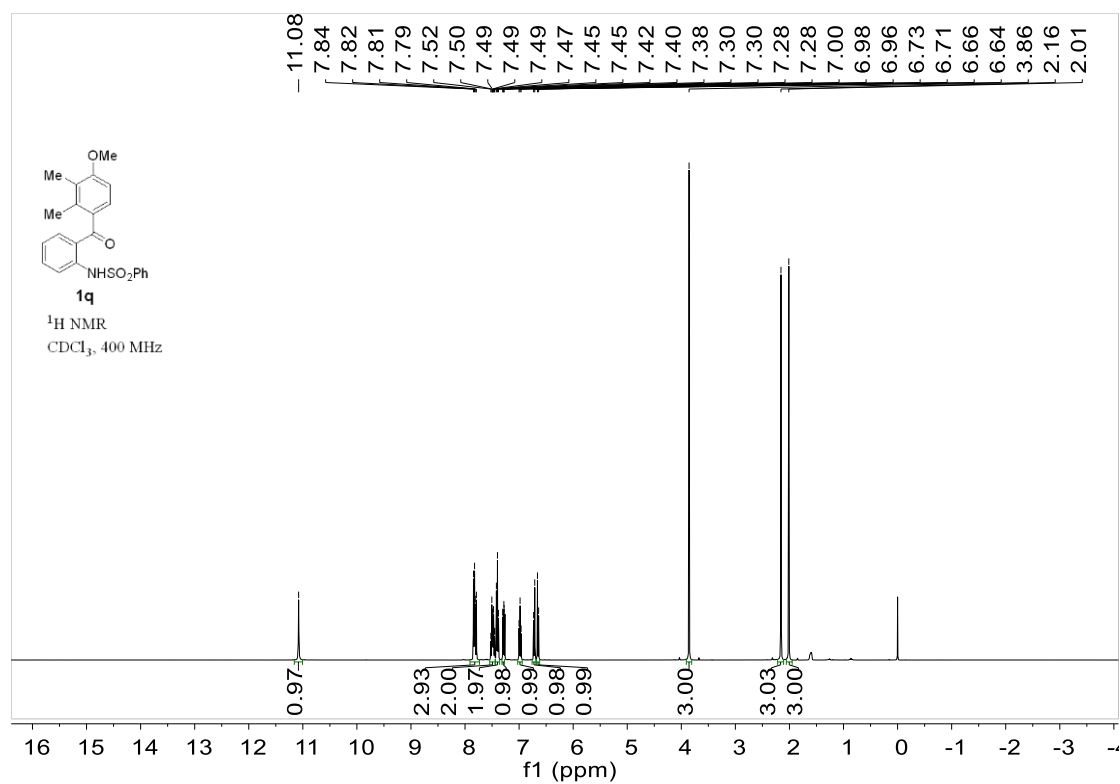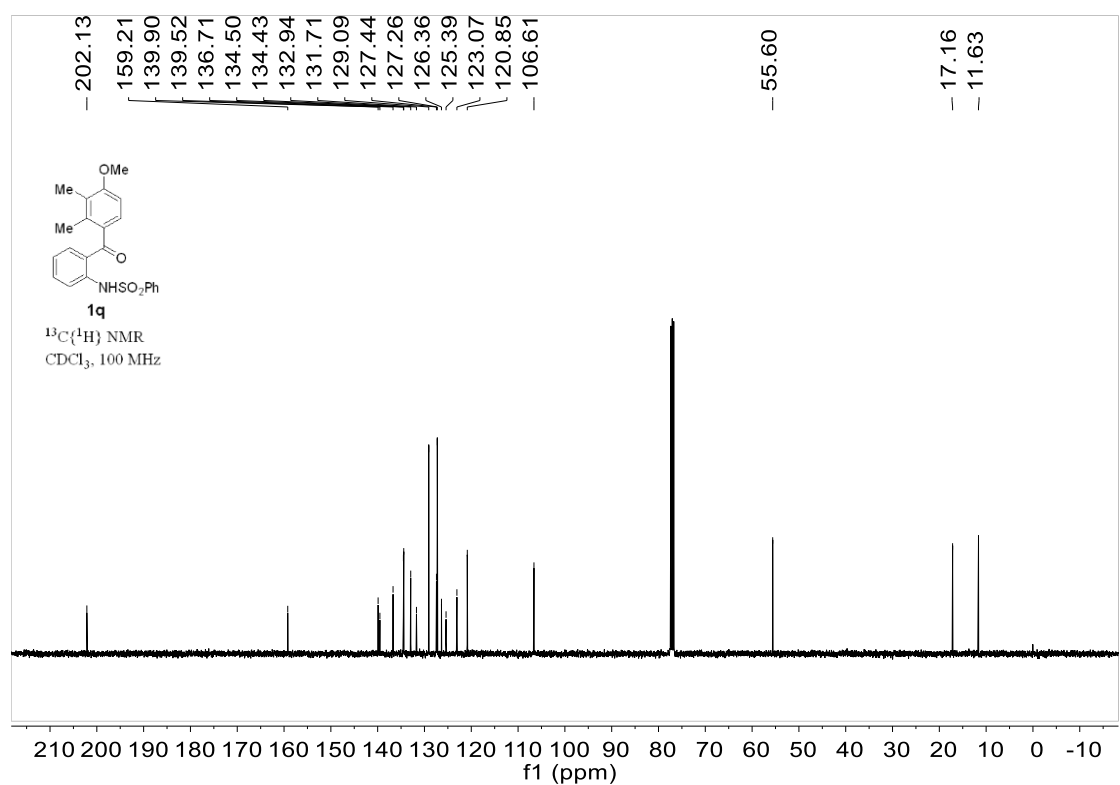

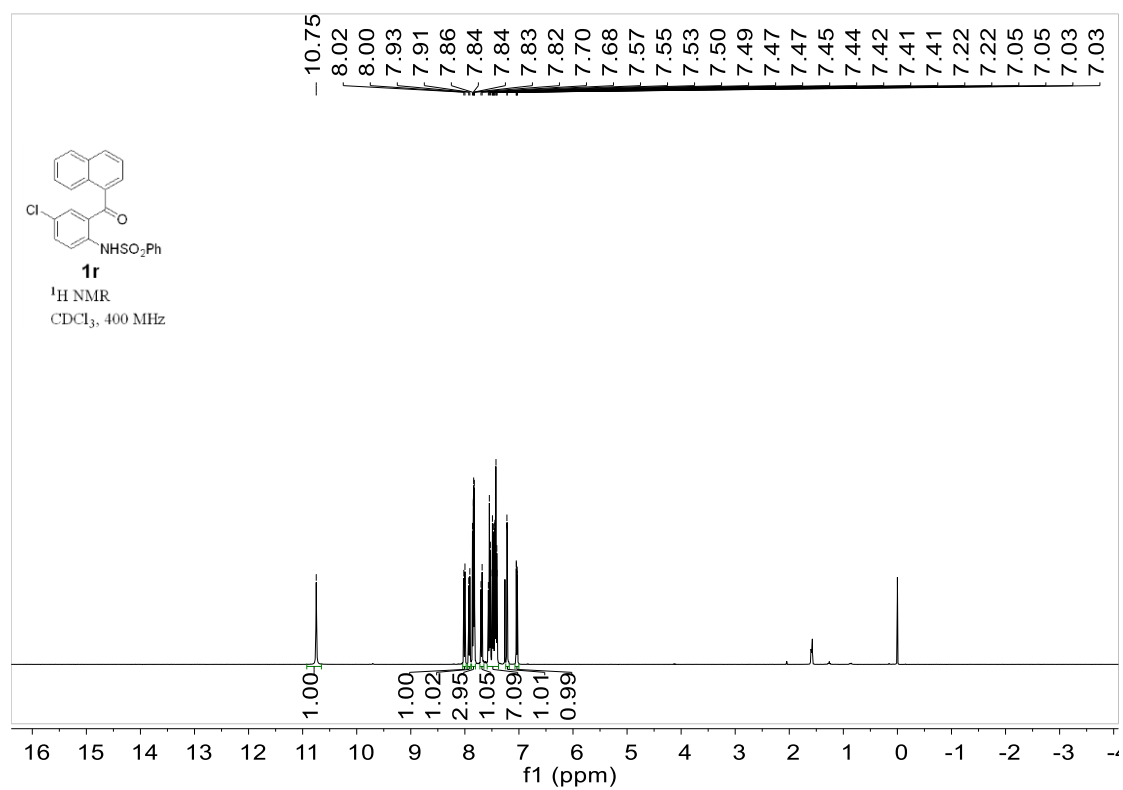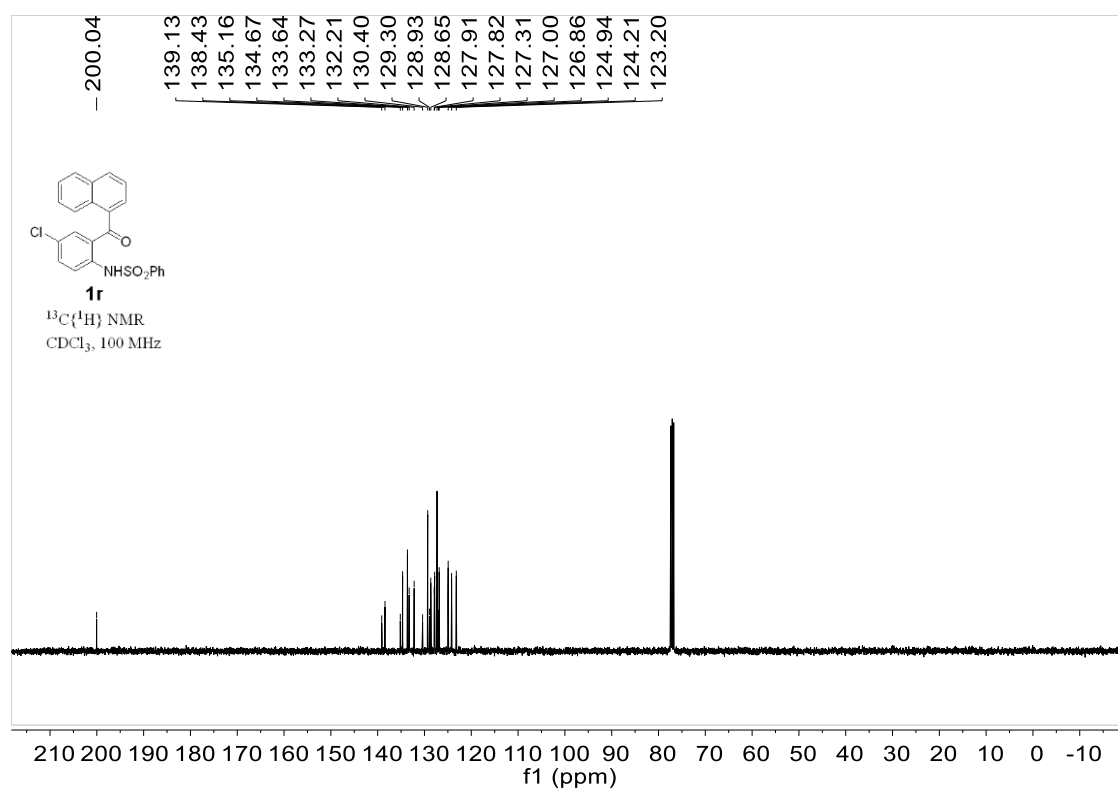

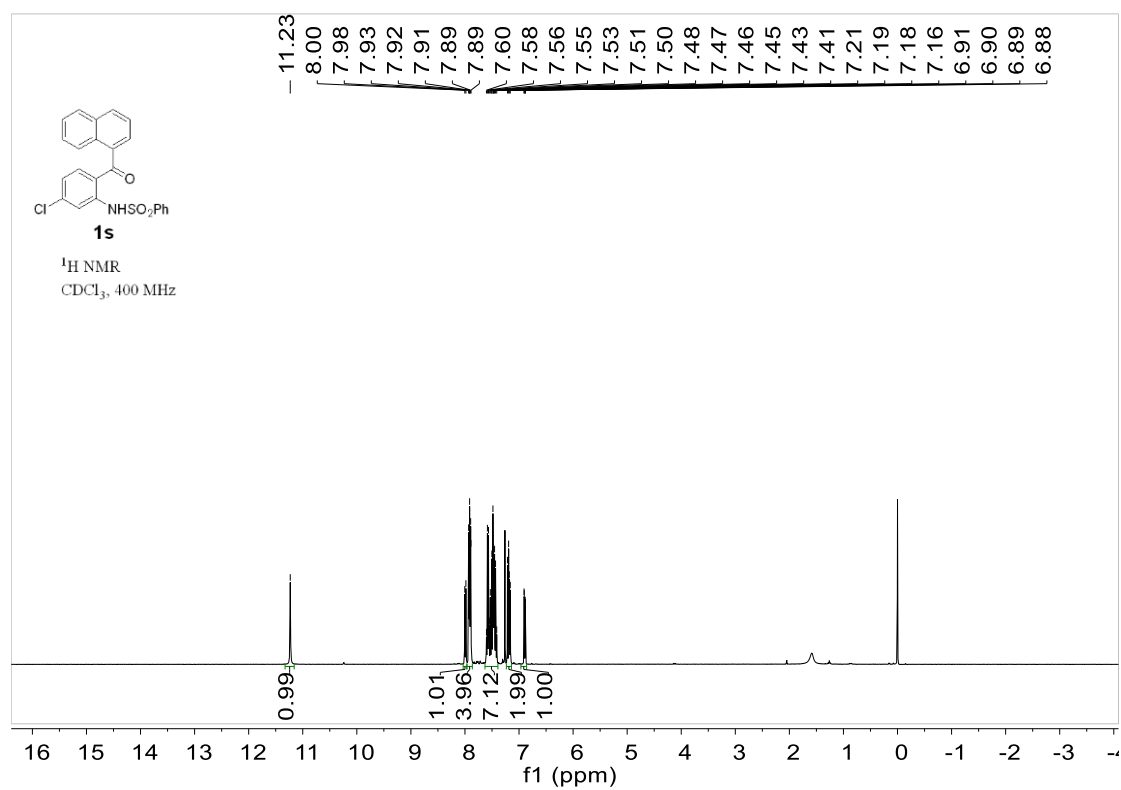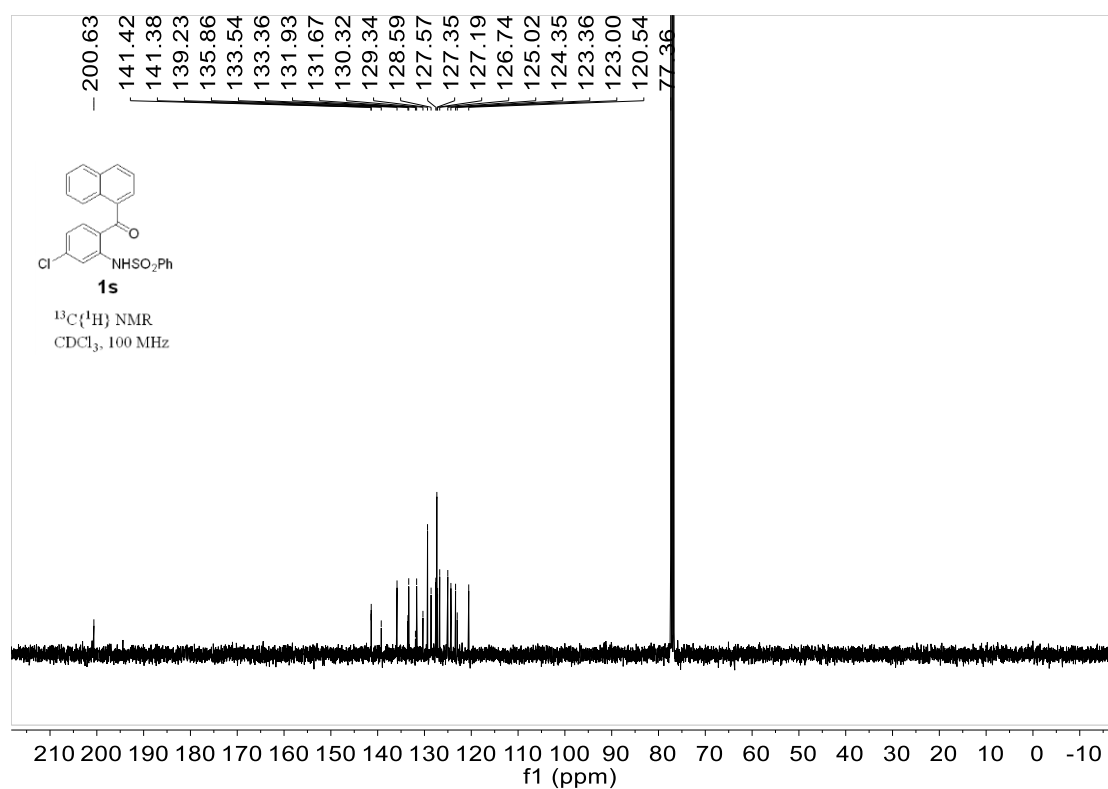

### 3. Chiral HPLC Analysis

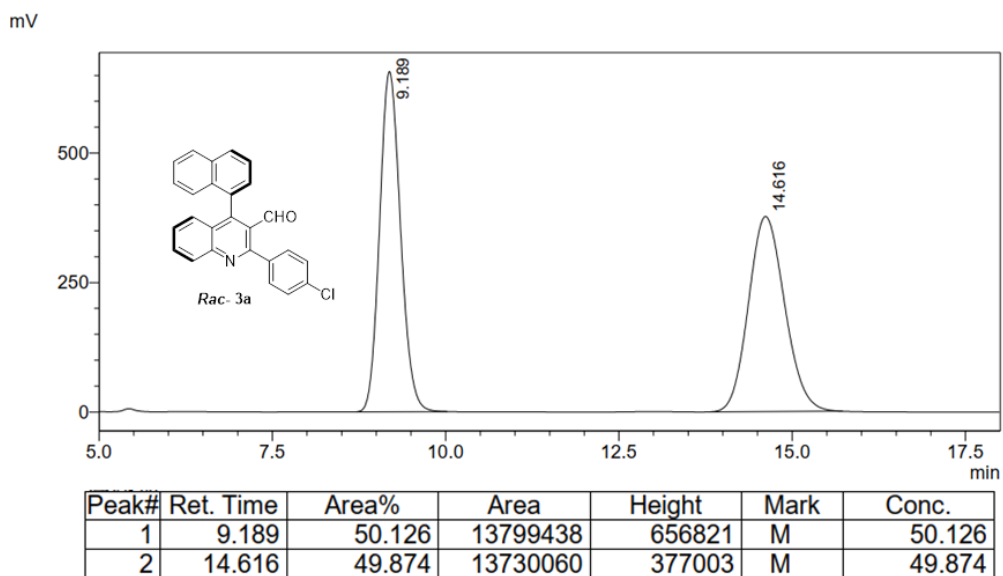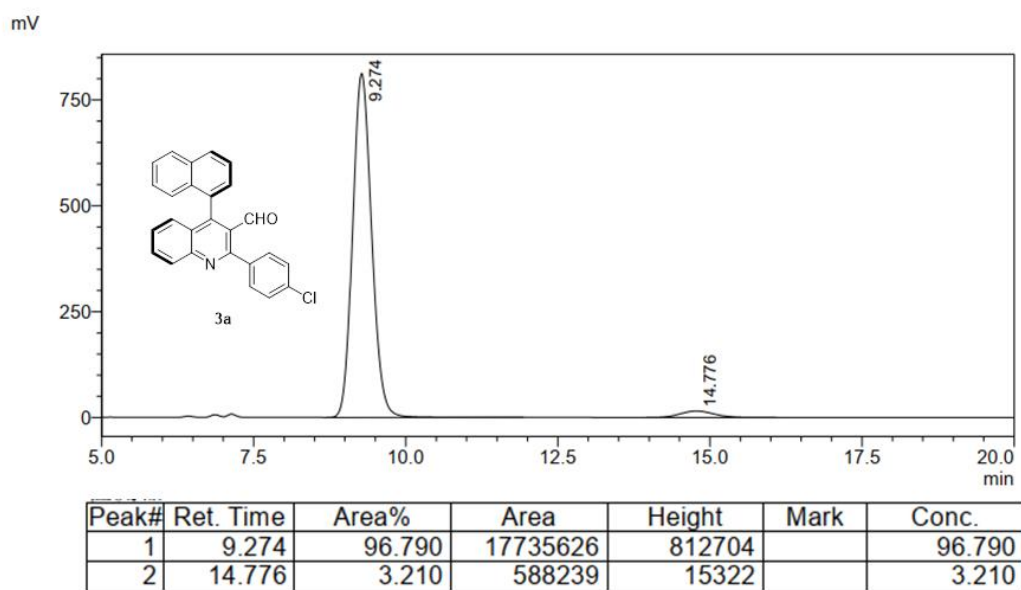

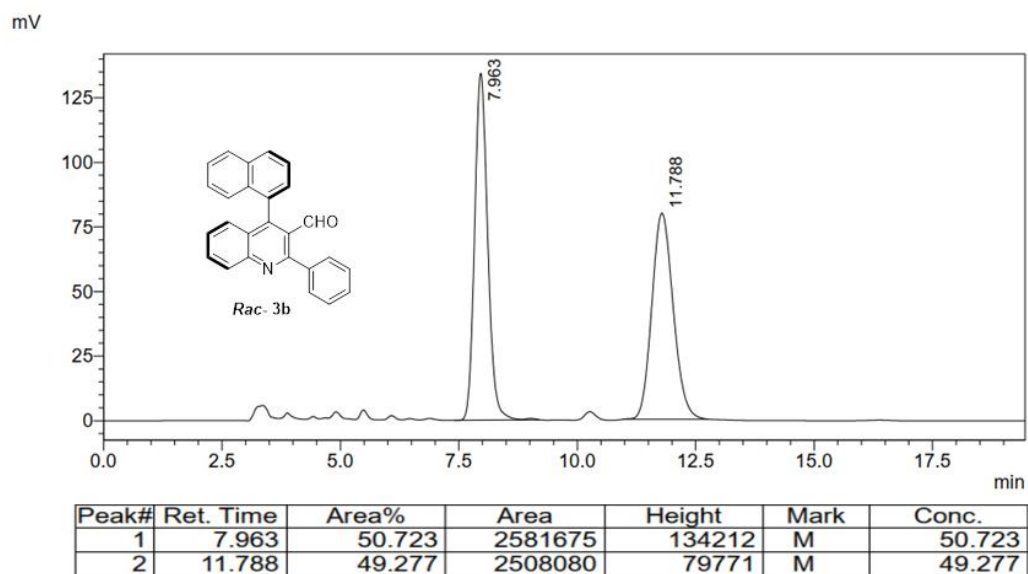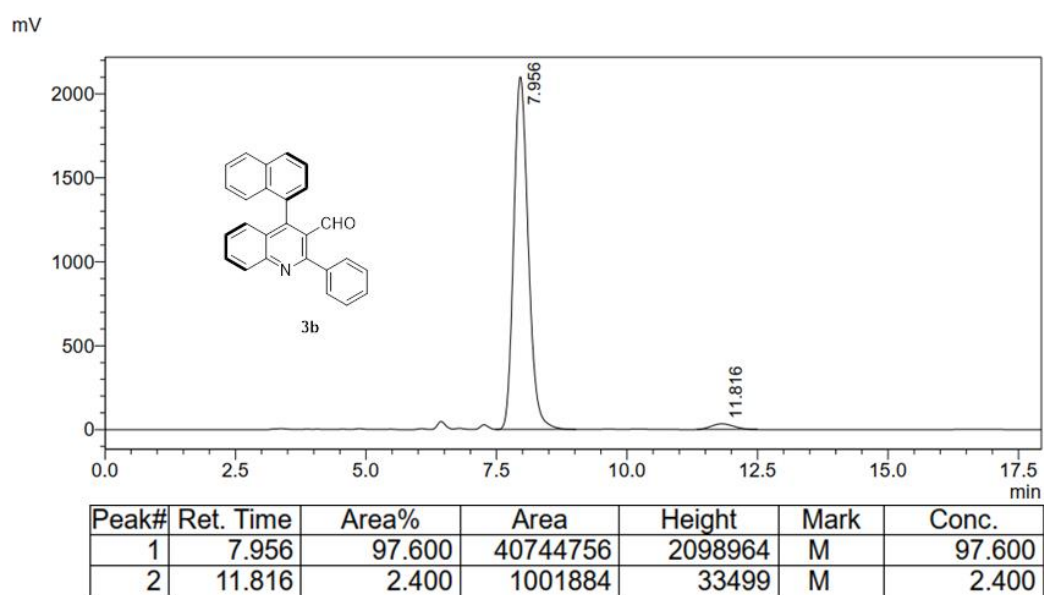



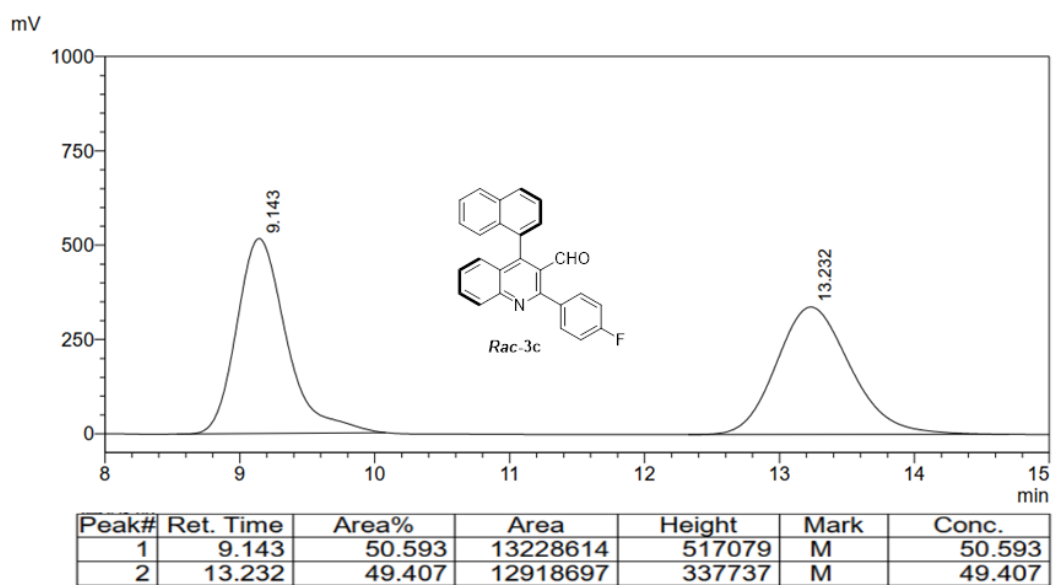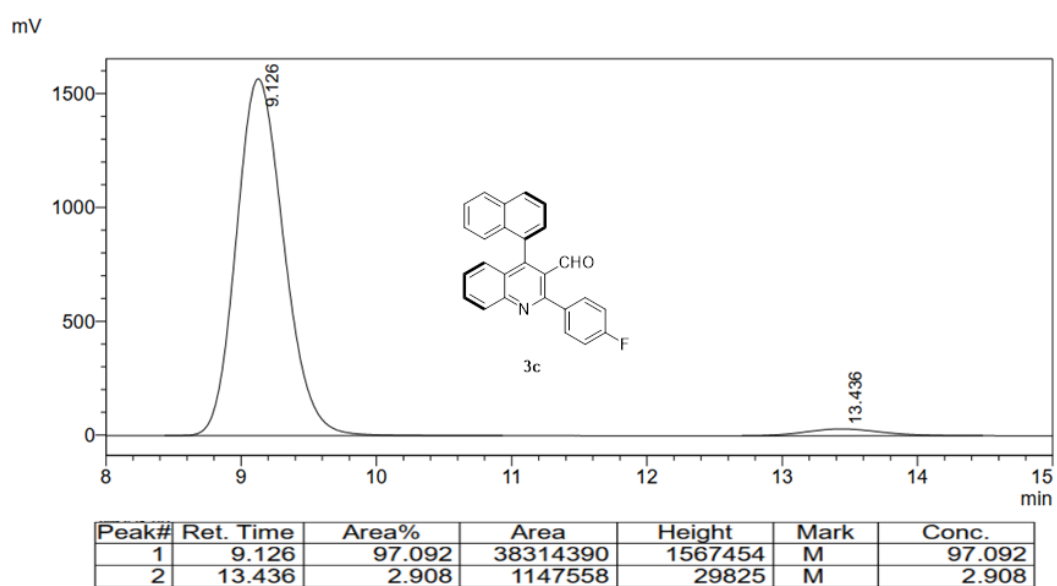

mV

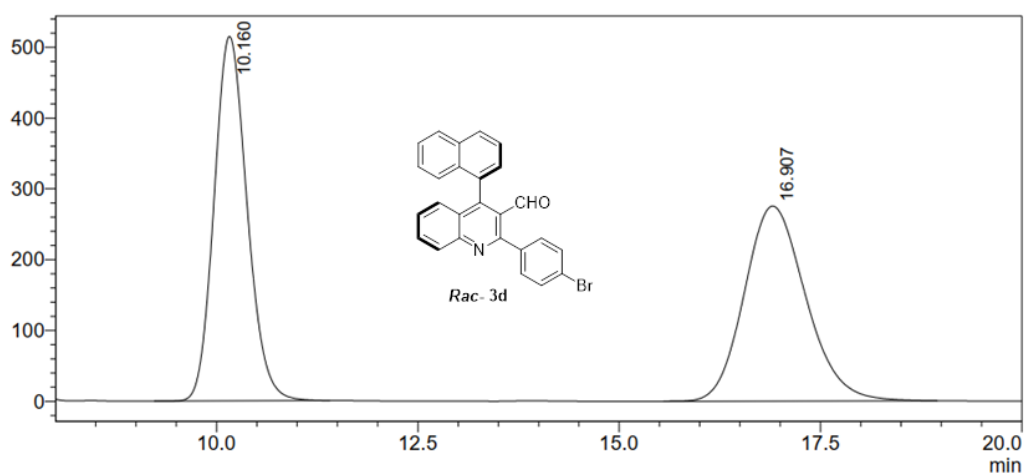

| Peak# | Ret. Time | Area%  | Area     | Height | Mark | Conc.  |
|-------|-----------|--------|----------|--------|------|--------|
| 1     | 10.160    | 50.117 | 14685485 | 514688 | M    | 50.117 |
| 2     | 16.907    | 49.883 | 14616692 | 275365 | M    | 49.883 |

mV

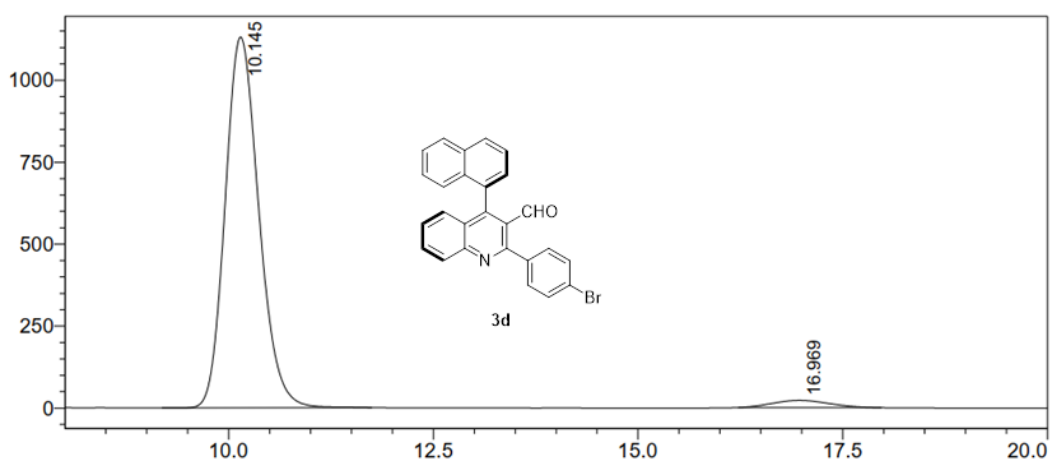

| Peak# | Ret. Time | Area%  | Area     | Height  | Mark | Conc.  |
|-------|-----------|--------|----------|---------|------|--------|
| 1     | 10.145    | 96.835 | 32412259 | 1131108 | M    | 96.835 |
| 2     | 16.969    | 3.165  | 1059330  | 21962   | M    | 3.165  |

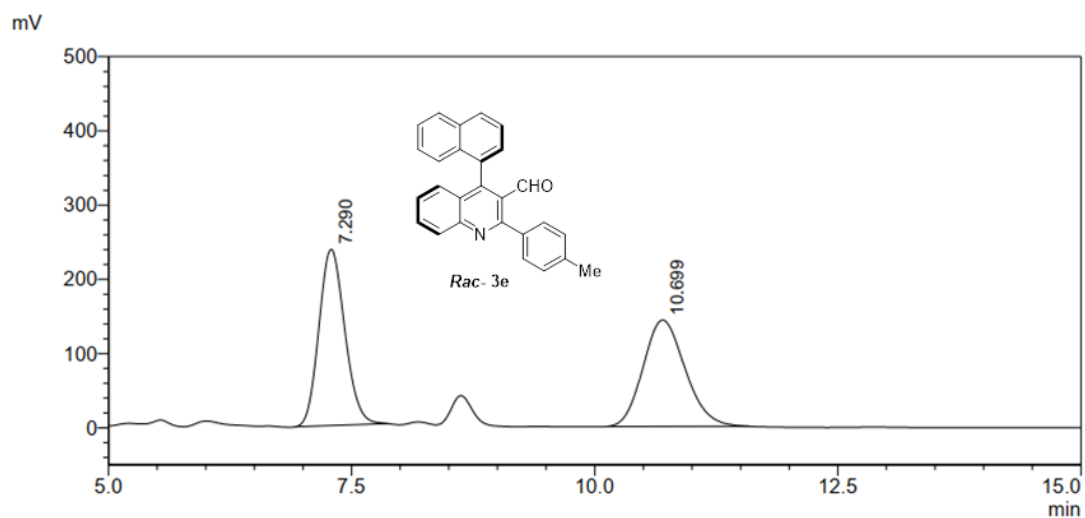

| Peak# | Ret. Time | Area%  | Area    | Height | Mark | Conc.  |
|-------|-----------|--------|---------|--------|------|--------|
| 1     | 7.290     | 50.371 | 4385993 | 237601 | M    | 50.371 |
| 2     | 10.699    | 49.629 | 4321302 | 143408 | M    | 49.629 |

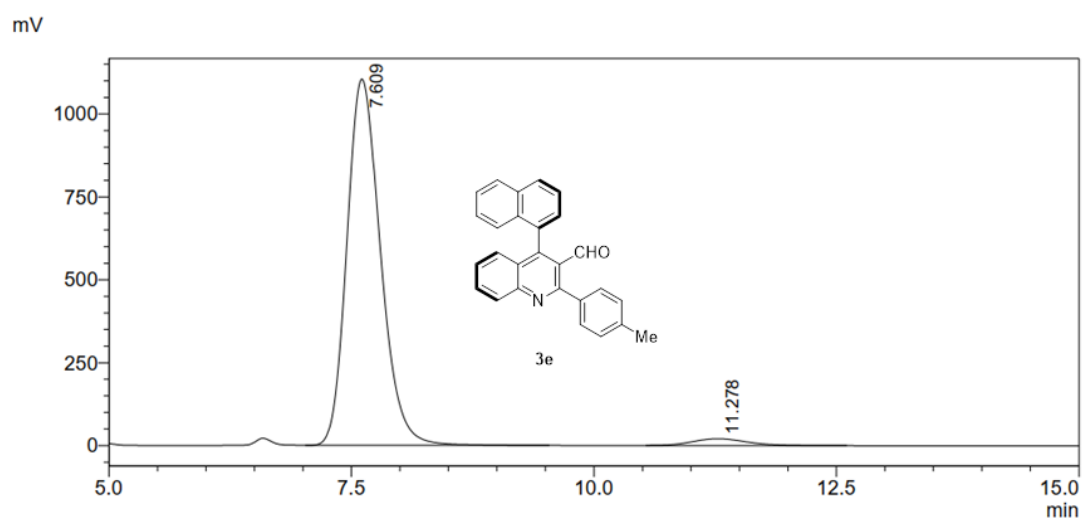

| Peak# | Ret. Time | Area%  | Area     | Height  | Mark | Conc.  |
|-------|-----------|--------|----------|---------|------|--------|
| 1     | 7.609     | 97.106 | 26638209 | 1104344 | M    | 97.106 |
| 2     | 11.278    | 2.894  | 793820   | 20420   | M    | 2.894  |

mV

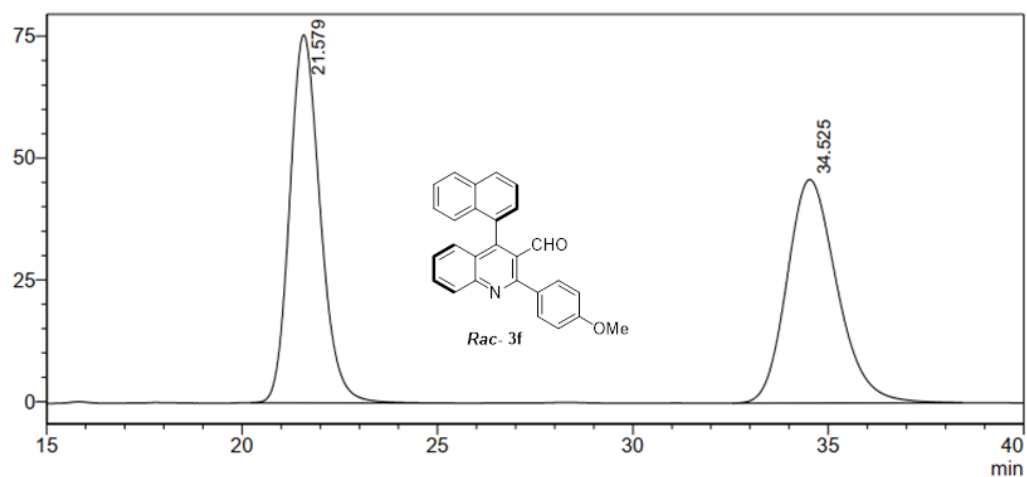

| Peak# | Ret. Time | Area%  | Area    | Height | Mark | Conc.  |
|-------|-----------|--------|---------|--------|------|--------|
| 1     | 21.579    | 50.088 | 4099155 | 75533  |      | 50.088 |
| 2     | 34.525    | 49.912 | 4084804 | 45861  |      | 49.912 |

mV

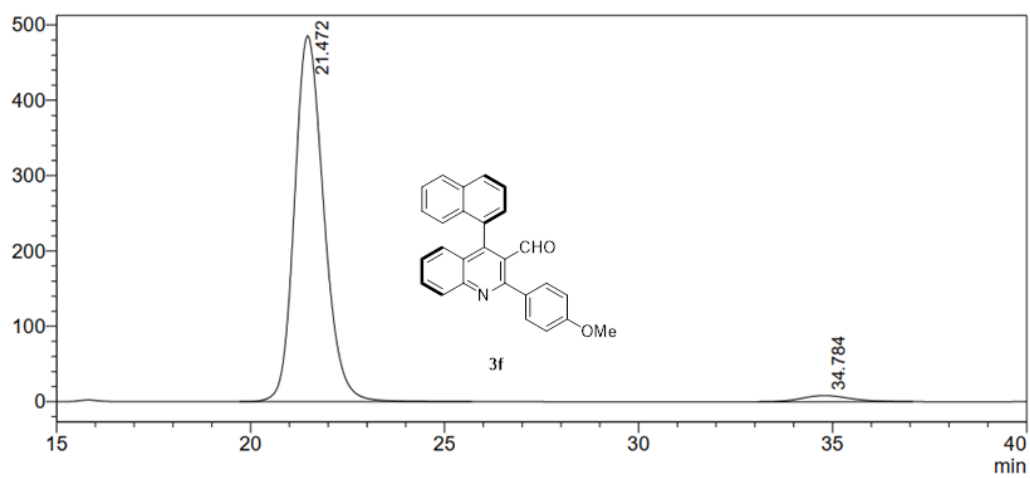

| Peak# | Ret. Time | Area%  | Area     | Height | Mark | Conc.  |
|-------|-----------|--------|----------|--------|------|--------|
| 1     | 21.472    | 97.335 | 25504159 | 485457 |      | 97.335 |
| 2     | 34.784    | 2.665  | 698404   | 8118   | M    | 2.665  |

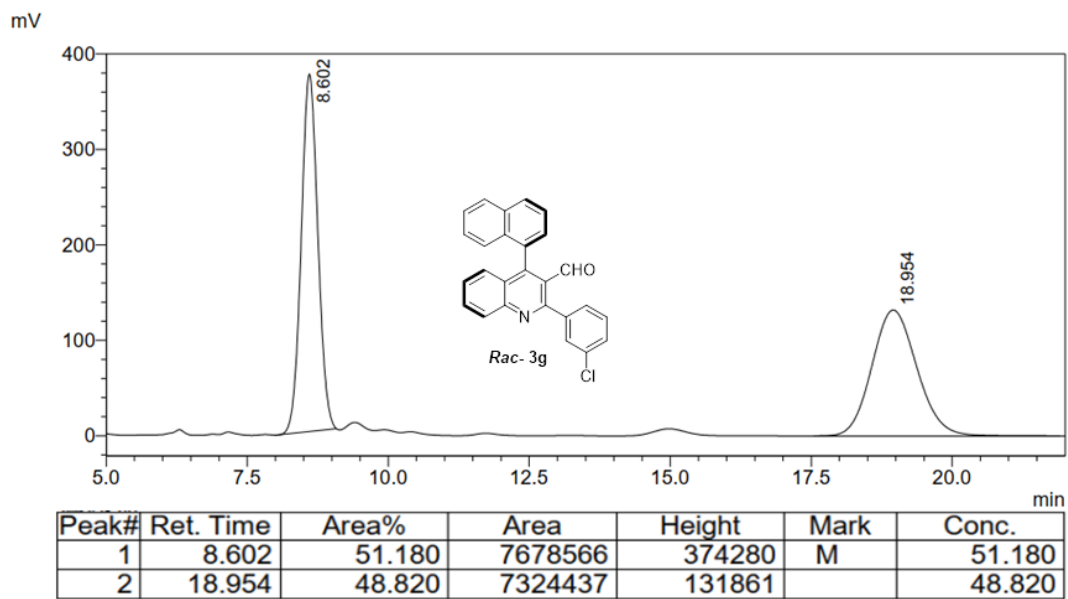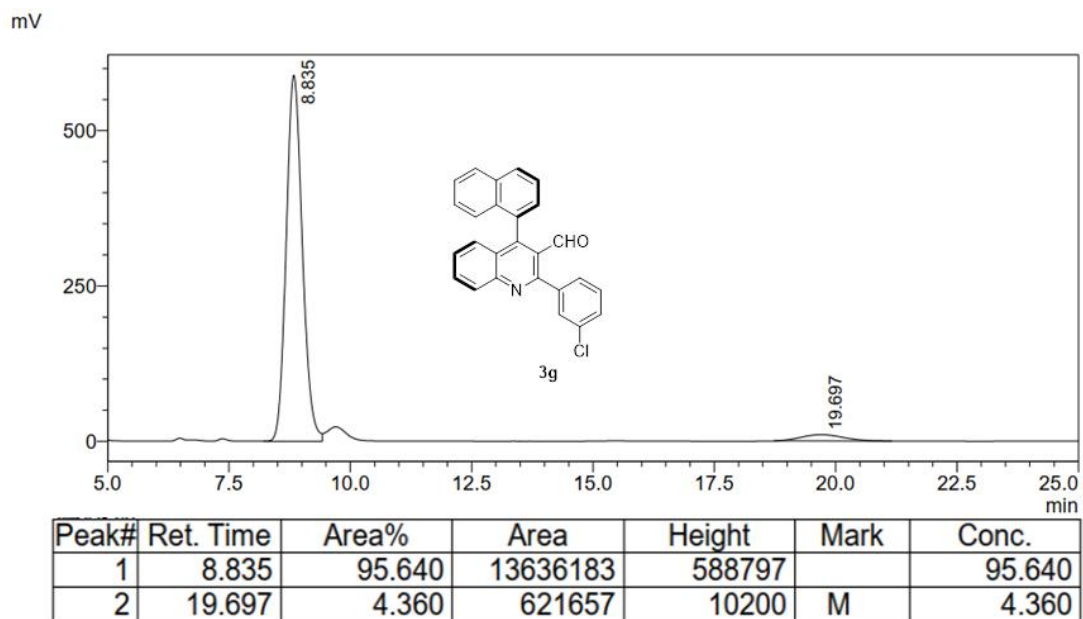

mV

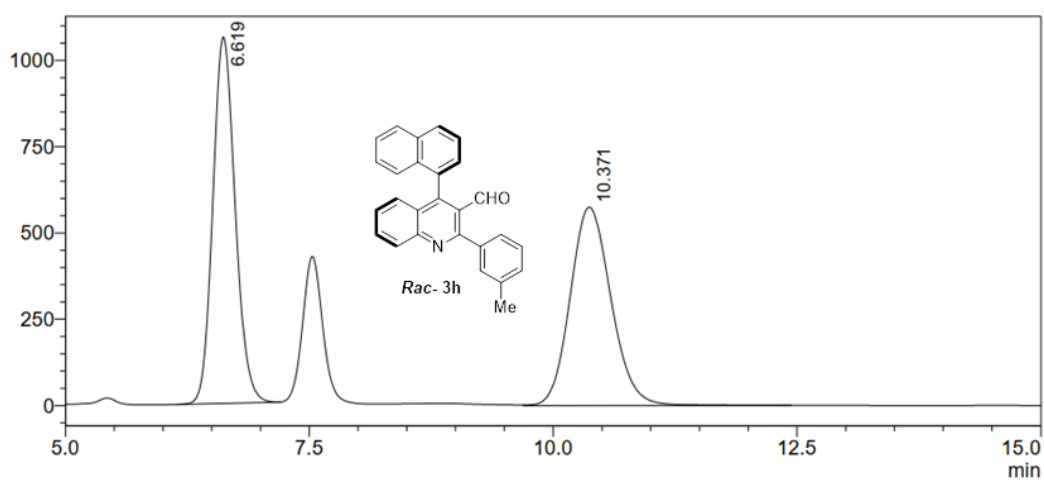

| Peak# | Ret. Time | Area%  | Area     | Height  | Mark | Conc.  |
|-------|-----------|--------|----------|---------|------|--------|
| 1     | 6.619     | 50.409 | 16967844 | 1061363 | M    | 50.409 |
| 2     | 10.371    | 49.591 | 16692561 | 574554  |      | 49.591 |

mV

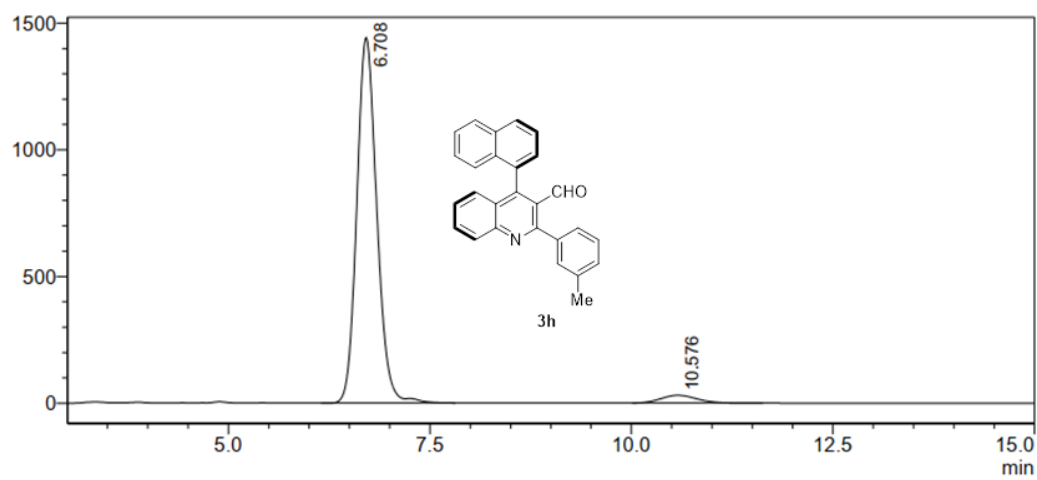

| Peak# | Ret. Time | Area%  | Area     | Height  | Mark | Conc.  |
|-------|-----------|--------|----------|---------|------|--------|
| 1     | 6.708     | 96.313 | 24918710 | 1441992 | M    | 96.313 |
| 2     | 10.576    | 3.687  | 953831   | 30590   | M    | 3.687  |

mV

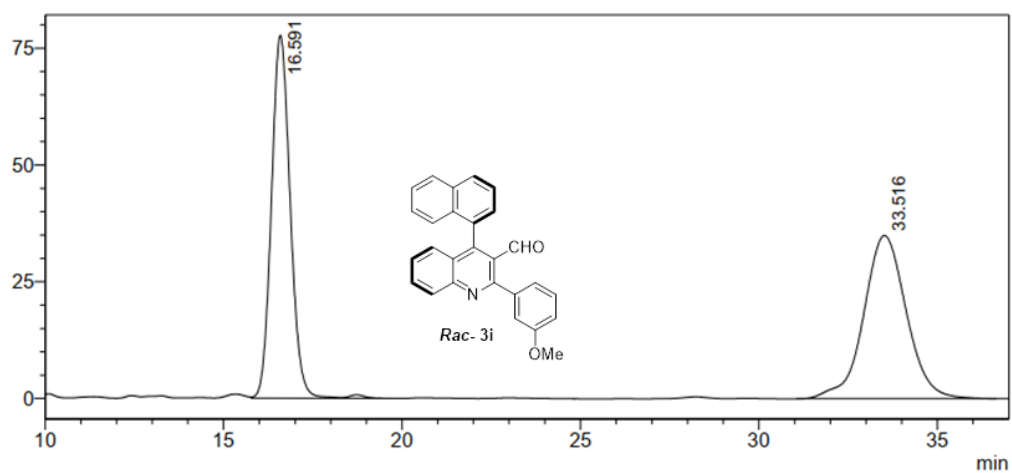

| Peak# | Ret. Time | Area%  | Area    | Height | Mark | Conc.  |
|-------|-----------|--------|---------|--------|------|--------|
| 1     | 16.591    | 49.599 | 2859522 | 77699  |      | 49.599 |
| 2     | 33.516    | 50.401 | 2905753 | 34947  |      | 50.401 |

mV

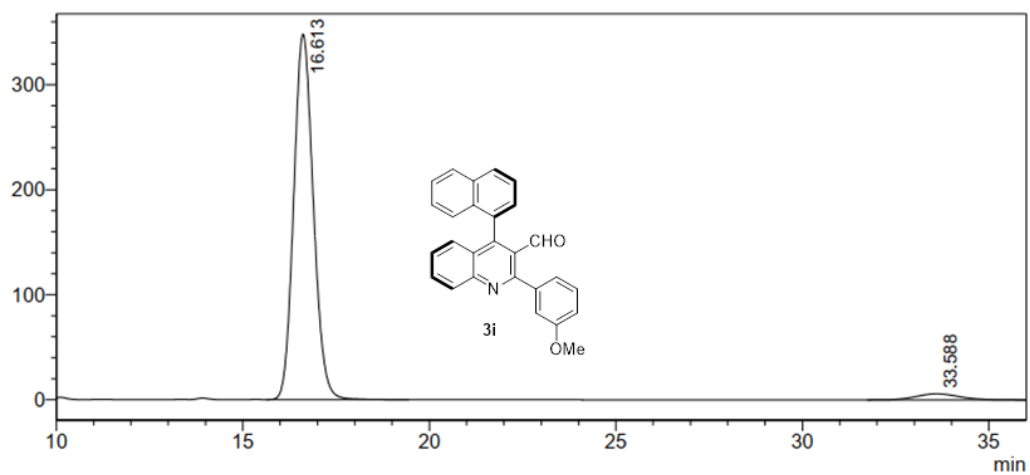

| Peak# | Ret. Time | Area%  | Area     | Height | Mark | Conc.  |
|-------|-----------|--------|----------|--------|------|--------|
| 1     | 16.613    | 96.509 | 12749320 | 348124 |      | 96.509 |
| 2     | 33.588    | 3.491  | 461218   | 5708   |      | 3.491  |

mV

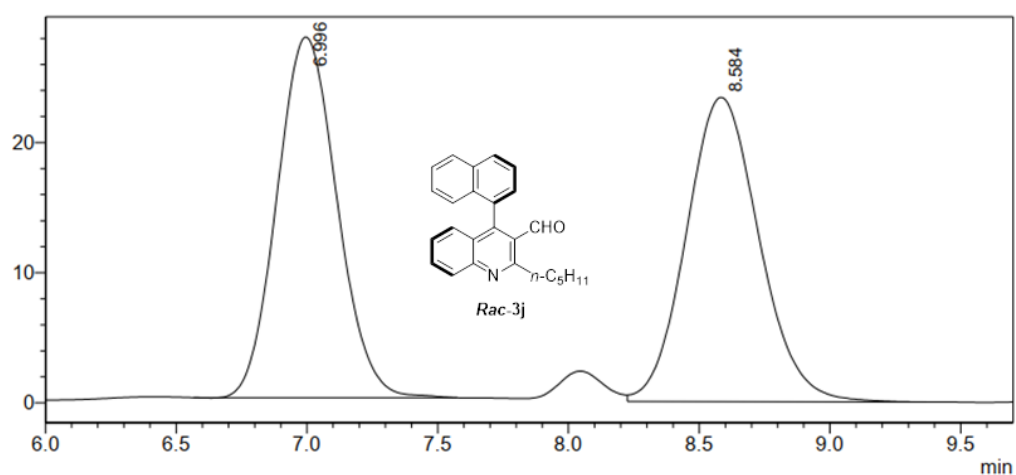

| Peak# | Ret. Time | Area%  | Area   | Height | Mark | Conc.  |
|-------|-----------|--------|--------|--------|------|--------|
| 1     | 6.996     | 49.495 | 443453 | 27690  | M    | 49.495 |
| 2     | 8.584     | 50.505 | 452497 | 23368  |      | 50.505 |

mV

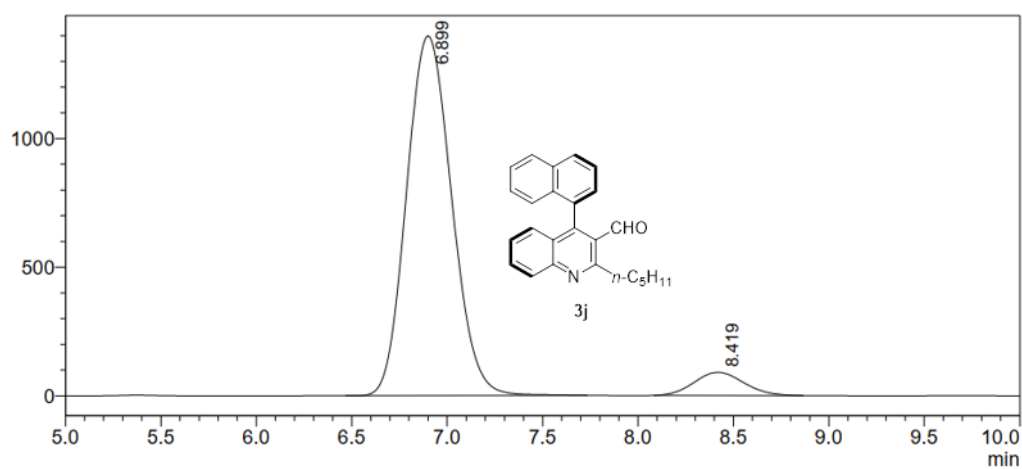

| Peak# | Ret. Time | Area%  | Area     | Height  | Mark | Conc.  |
|-------|-----------|--------|----------|---------|------|--------|
| 1     | 6.899     | 93.381 | 23007099 | 1398382 | M    | 93.381 |
| 2     | 8.419     | 6.619  | 1630768  | 89893   | M    | 6.619  |



mV

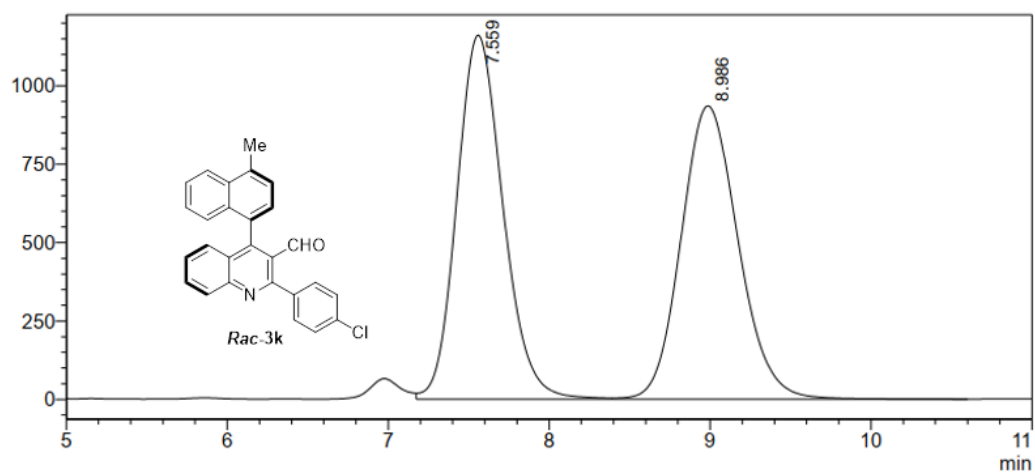

| Peak# | Ret. Time | Area%  | Area     | Height  | Mark | Conc.  |
|-------|-----------|--------|----------|---------|------|--------|
| 1     | 7.559     | 50.080 | 23219823 | 1161670 |      | 50.080 |
| 2     | 8.986     | 49.920 | 23145398 | 935782  | V    | 49.920 |

mV

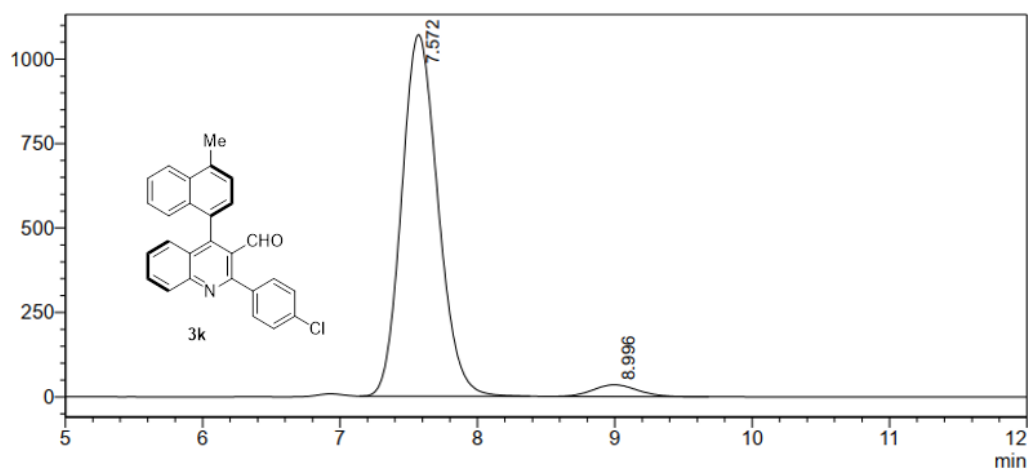

| Peak# | Ret. Time | Area%  | Area     | Height  | Mark | Conc.  |
|-------|-----------|--------|----------|---------|------|--------|
| 1     | 7.572     | 96.142 | 19716931 | 1070066 | M    | 96.142 |
| 2     | 8.996     | 3.858  | 791109   | 35051   | M    | 3.858  |

mV

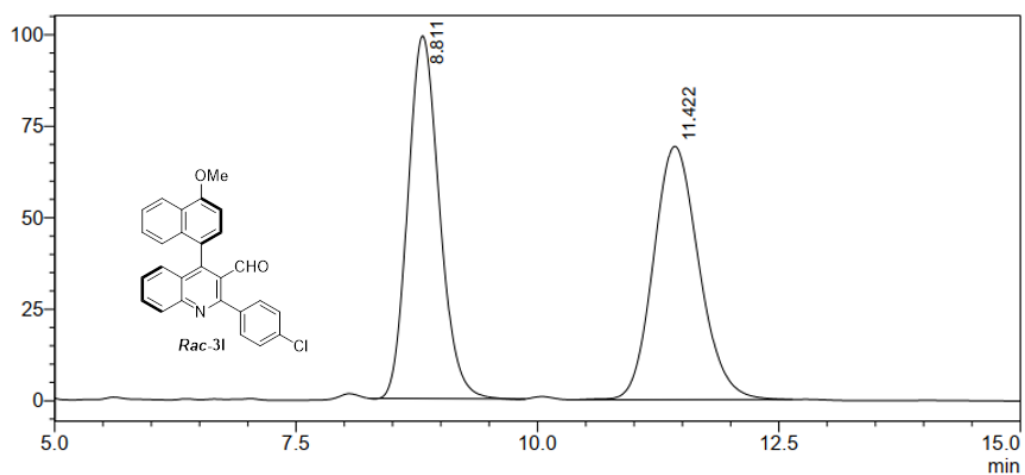

| Peak# | Ret. Time | Area%  | Area    | Height | Mark | Conc.  |
|-------|-----------|--------|---------|--------|------|--------|
| 1     | 8.811     | 49.823 | 2254425 | 99115  | M    | 49.823 |
| 2     | 11.422    | 50.177 | 2270434 | 69226  |      | 50.177 |

mV

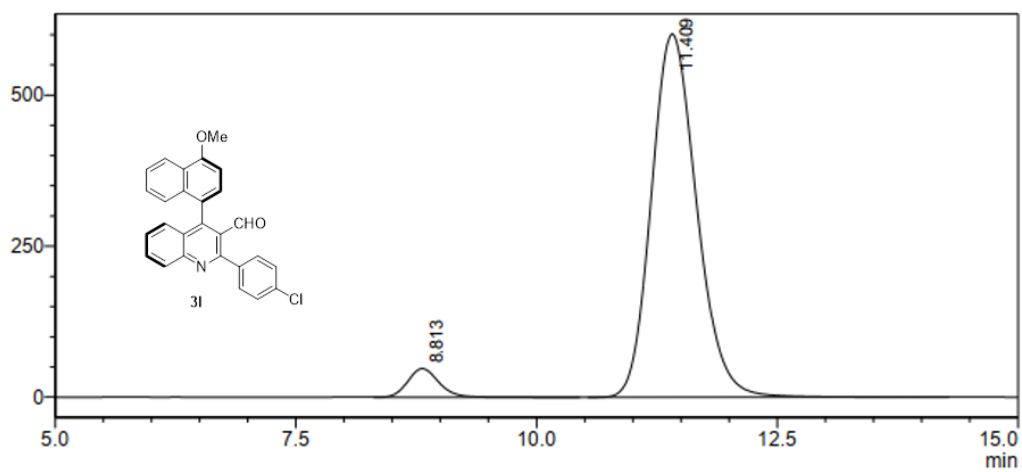

| Peak# | Ret. Time | Area%  | Area     | Height | Mark | Conc.  |
|-------|-----------|--------|----------|--------|------|--------|
| 1     | 8.813     | 5.150  | 1069144  | 47368  |      | 5.150  |
| 2     | 11.409    | 94.850 | 19690201 | 601201 |      | 94.850 |

mV

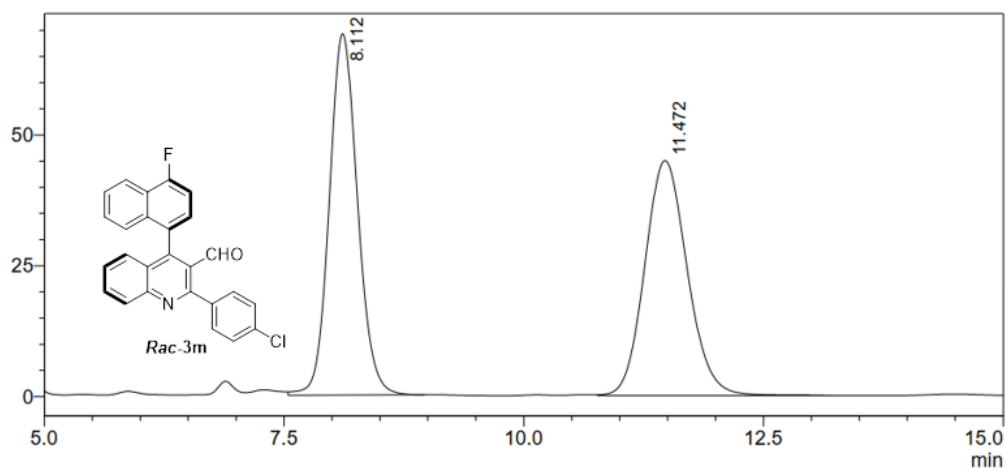

| Peak# | Ret. Time | Area%  | Area    | Height | Mark | Conc.  |
|-------|-----------|--------|---------|--------|------|--------|
| 1     | 8.112     | 50.480 | 1414237 | 69026  |      | 50.480 |
| 2     | 11.472    | 49.520 | 1387352 | 44932  | S    | 49.520 |

mV

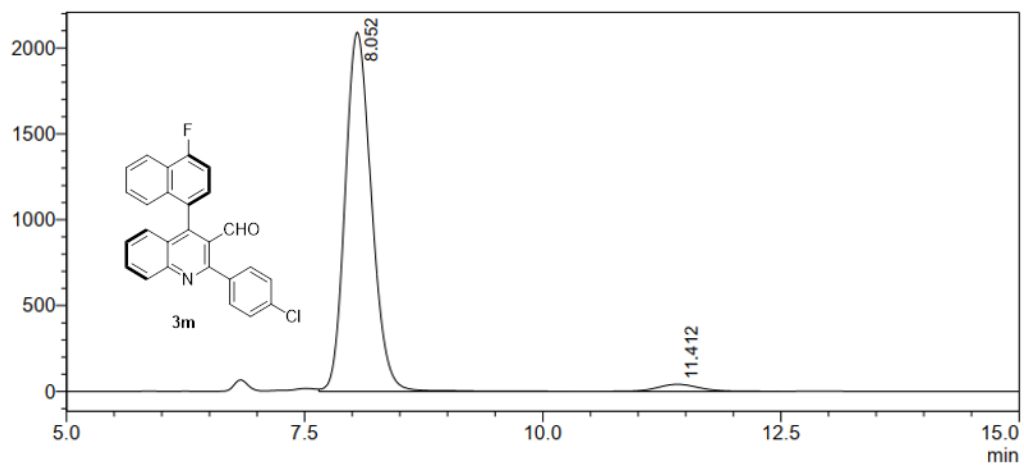

| Peak# | Ret. Time | Area%  | Area     | Height  | Mark | Conc.  |
|-------|-----------|--------|----------|---------|------|--------|
| 1     | 8.052     | 97.085 | 40253660 | 2091278 |      | 97.085 |
| 2     | 11.412    | 2.915  | 1208423  | 41036   |      | 2.915  |

mV

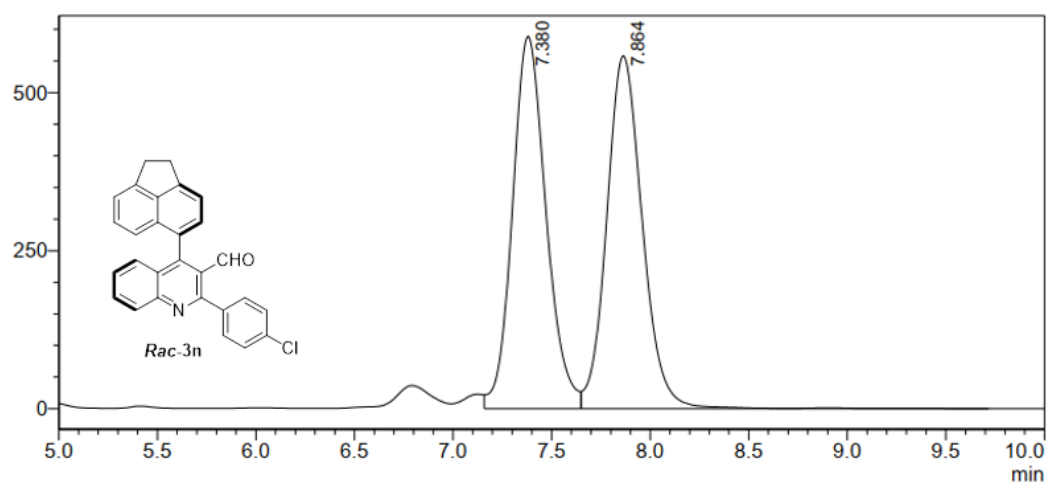

| Peak# | Ret. Time | Area%  | Area    | Height | Mark | Conc.  |
|-------|-----------|--------|---------|--------|------|--------|
| 1     | 7.380     | 49.843 | 6996728 | 588362 |      | 49.843 |
| 2     | 7.864     | 50.157 | 7040676 | 557791 | V    | 50.157 |

mV

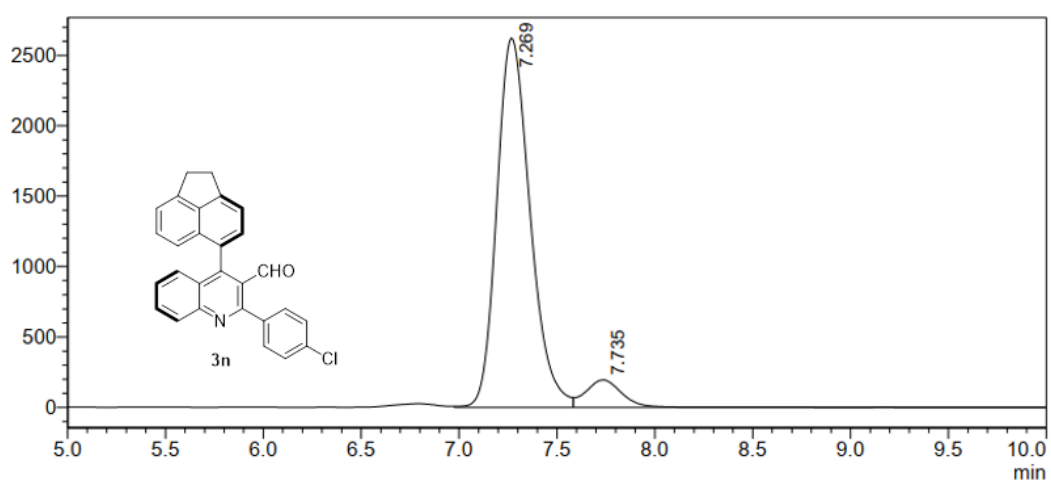

| Peak# | Ret. Time | Area%  | Area     | Height  | Mark | Conc.  |
|-------|-----------|--------|----------|---------|------|--------|
| 1     | 7.269     | 92.474 | 31056388 | 2622517 |      | 92.474 |
| 2     | 7.735     | 7.526  | 2527606  | 193941  | V    | 7.526  |

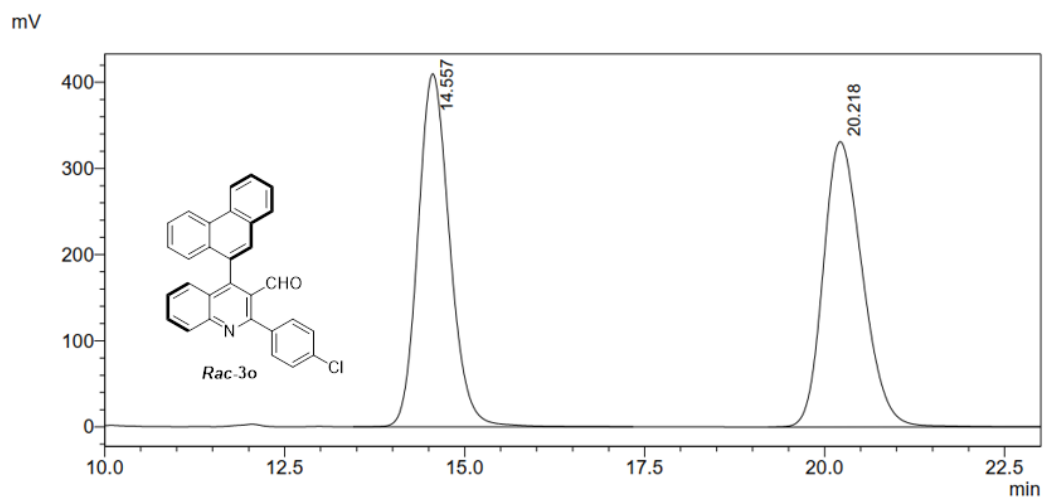

| Peak# | Ret. Time | Area%  | Area     | Height | Mark | Conc.  |
|-------|-----------|--------|----------|--------|------|--------|
| 1     | 14.557    | 49.944 | 12555082 | 409893 |      | 49.944 |
| 2     | 20.218    | 50.056 | 12583281 | 331254 |      | 50.056 |

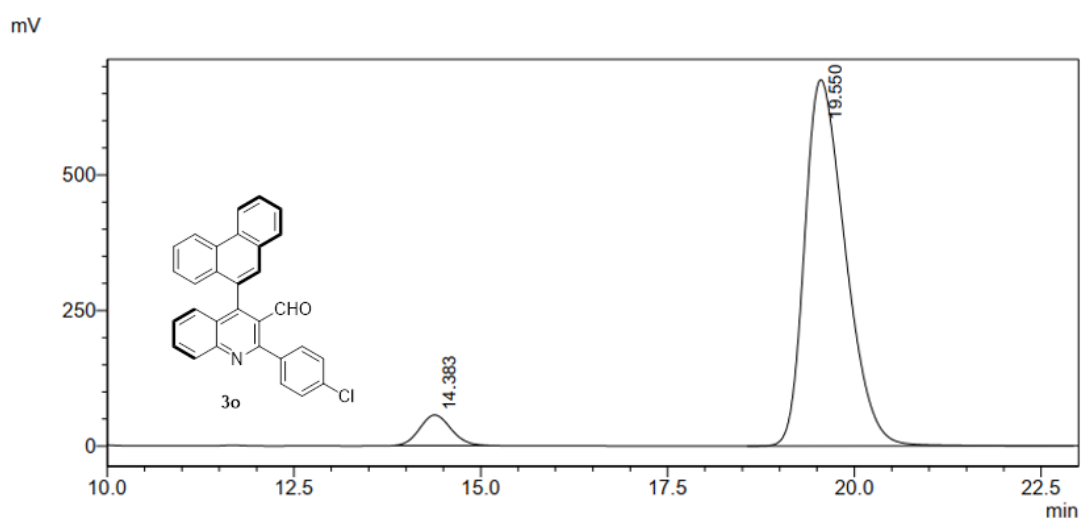

| Peak# | Ret. Time | Area%  | Area     | Height | Mark | Conc.  |
|-------|-----------|--------|----------|--------|------|--------|
| 1     | 14.383    | 6.023  | 1640175  | 56239  | M    | 6.023  |
| 2     | 19.550    | 93.977 | 25589710 | 675460 |      | 93.977 |

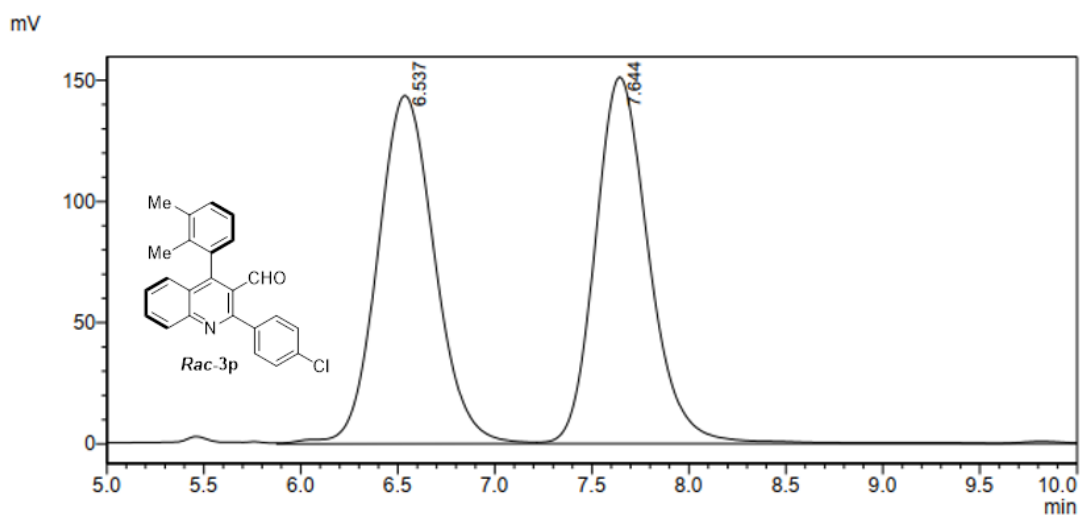

| Peak# | Ret. Time | Area%  | Area    | Height | Mark | Conc.  |
|-------|-----------|--------|---------|--------|------|--------|
| 1     | 6.537     | 49.941 | 2940270 | 143610 |      | 49.941 |
| 2     | 7.644     | 50.059 | 2947171 | 151252 | V    | 50.059 |

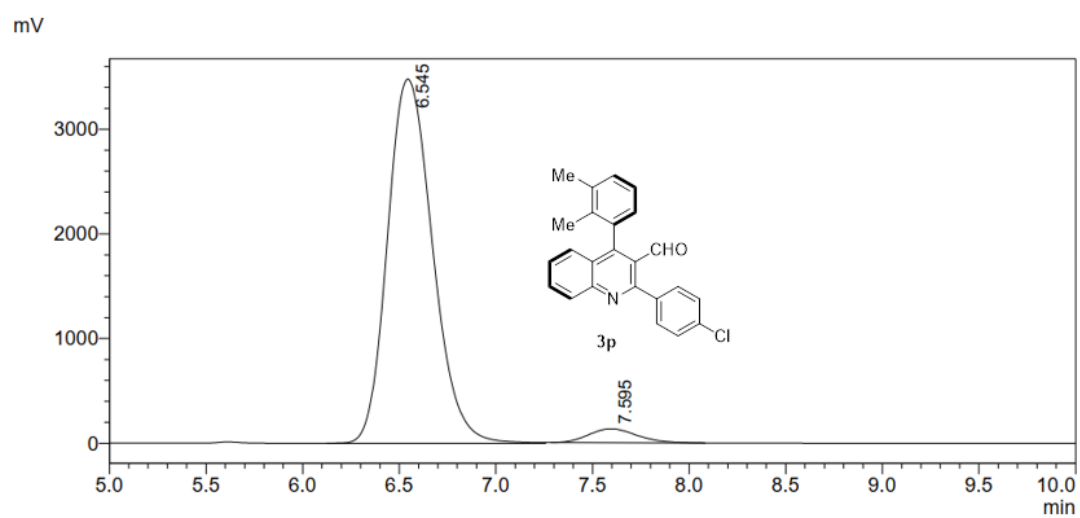

| Peak# | Ret. Time | Area%  | Area     | Height  | Mark | Conc.  |
|-------|-----------|--------|----------|---------|------|--------|
| 1     | 6.545     | 96.068 | 56597543 | 3479406 |      | 96.068 |
| 2     | 7.595     | 3.932  | 2316685  | 133230  | M    | 3.932  |

mV

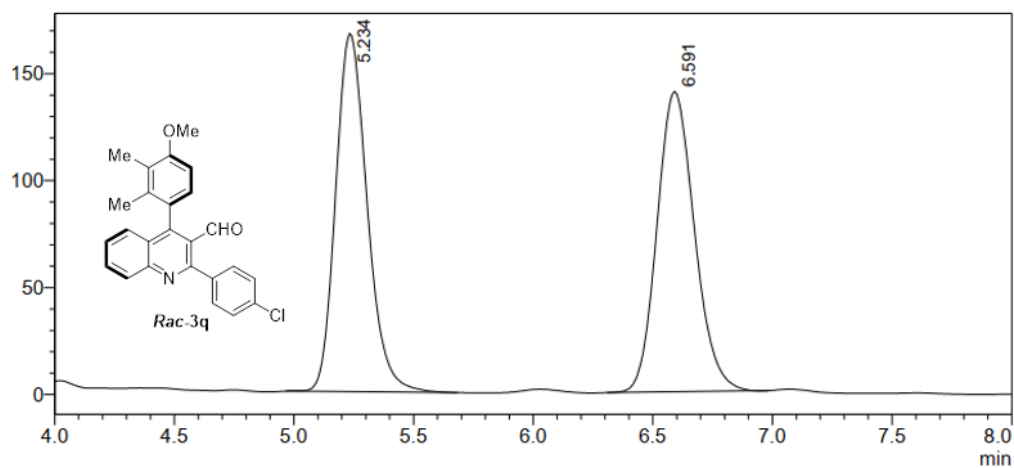

| Peak# | Ret. Time | Area%  | Area    | Height | Mark | Conc.  |
|-------|-----------|--------|---------|--------|------|--------|
| 1     | 5.234     | 50.055 | 1531036 | 167417 | M    | 50.055 |
| 2     | 6.591     | 49.945 | 1527674 | 140393 | M    | 49.945 |

mV

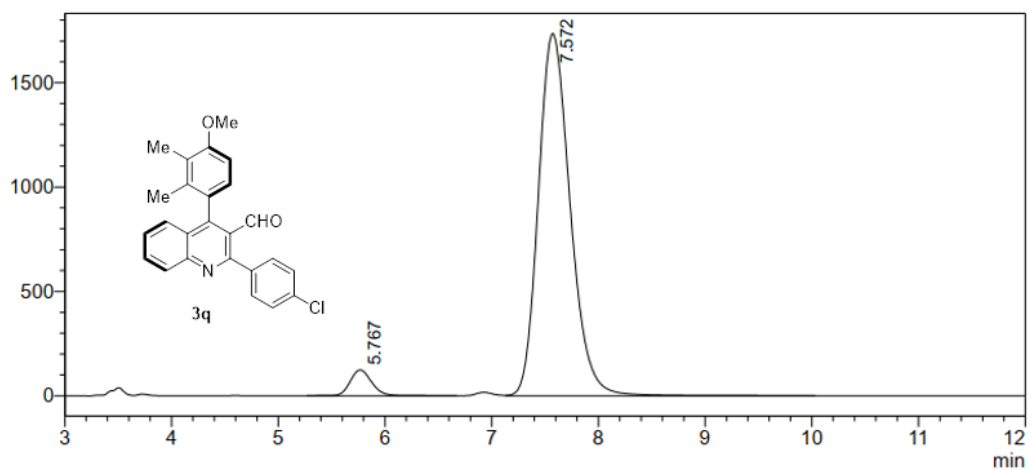

| Peak# | Ret. Time | Area%  | Area     | Height  | Mark | Conc.  |
|-------|-----------|--------|----------|---------|------|--------|
| 1     | 5.767     | 4.744  | 1787908  | 124903  | S    | 4.744  |
| 2     | 7.572     | 95.256 | 35903059 | 1734820 |      | 95.256 |

mV

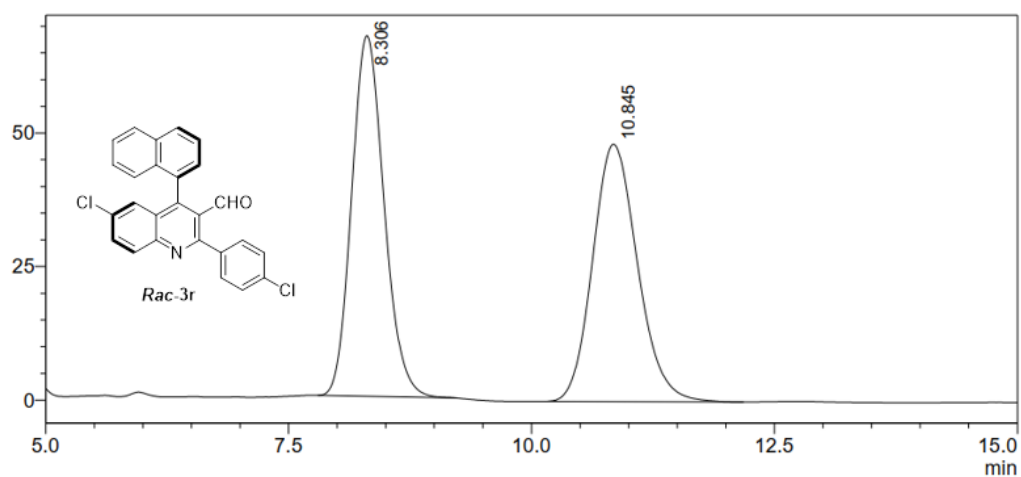

| Peak# | Ret. Time | Area%  | Area    | Height | Mark | Conc.  |
|-------|-----------|--------|---------|--------|------|--------|
| 1     | 8.306     | 50.272 | 1569270 | 67520  | M    | 50.272 |
| 2     | 10.845    | 49.728 | 1552308 | 48210  |      | 49.728 |

mV

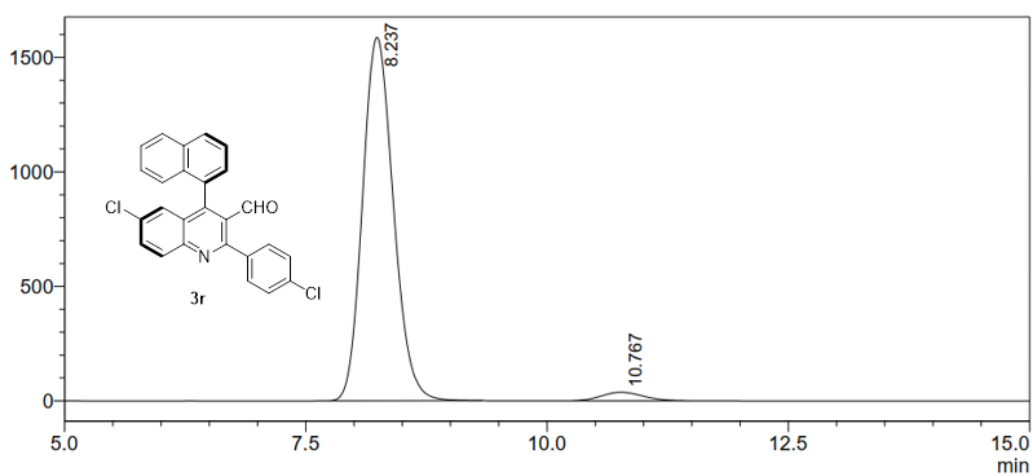

| Peak# | Ret. Time | Area%  | Area     | Height  | Mark | Conc.  |
|-------|-----------|--------|----------|---------|------|--------|
| 1     | 8.237     | 96.976 | 35313190 | 1587344 | M    | 96.976 |
| 2     | 10.767    | 3.024  | 1100985  | 36996   | M    | 3.024  |



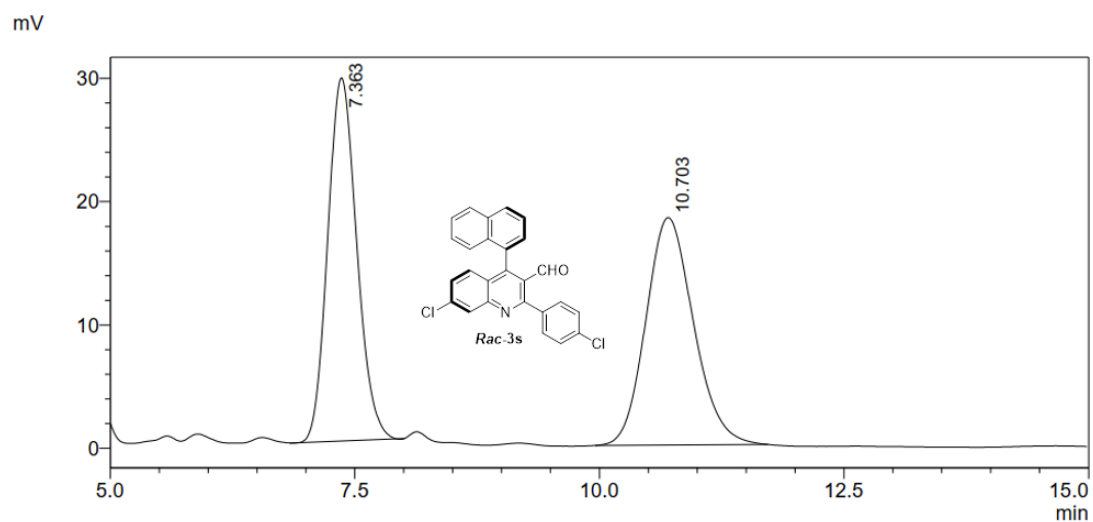

| Peak# | Ret. Time | Area%  | Area   | Height | Mark | Conc.  |
|-------|-----------|--------|--------|--------|------|--------|
| 1     | 7.363     | 49.288 | 607554 | 29445  | M    | 49.288 |
| 2     | 10.703    | 50.712 | 625095 | 18447  | M    | 50.712 |

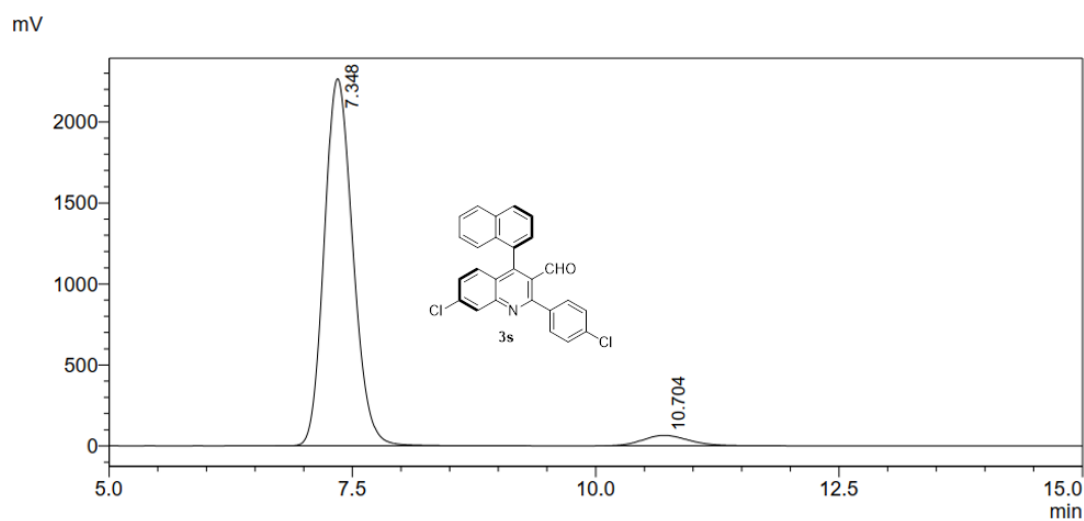

| Peak# | Ret. Time | Area%  | Area     | Height  | Mark | Conc.  |
|-------|-----------|--------|----------|---------|------|--------|
| 1     | 7.348     | 95.599 | 46223528 | 2265935 | M    | 95.599 |
| 2     | 10.704    | 4.401  | 2128185  | 64459   | M    | 4.401  |

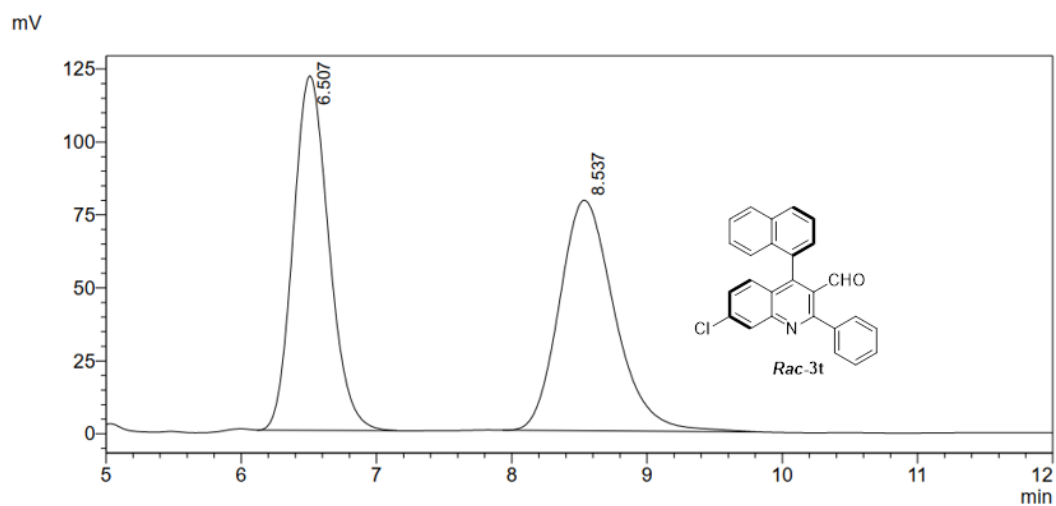

| Peak# | Ret. Time | Area%  | Area    | Height | Mark | Conc.  |
|-------|-----------|--------|---------|--------|------|--------|
| 1     | 6.507     | 49.754 | 2218275 | 121475 | M    | 49.754 |
| 2     | 8.537     | 50.246 | 2240235 | 78950  | M    | 50.246 |

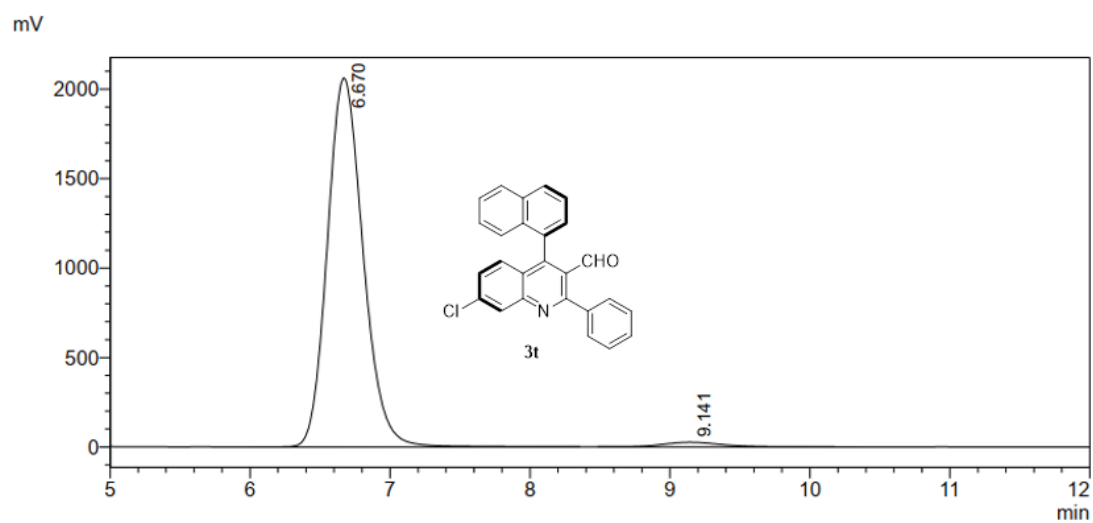

| Peak# | Ret. Time | Area%  | Area     | Height  | Mark | Conc.  |
|-------|-----------|--------|----------|---------|------|--------|
| 1     | 6.670     | 98.003 | 36663338 | 2061199 | M    | 98.003 |
| 2     | 9.141     | 1.997  | 747053   | 25702   | M    | 1.997  |

mV

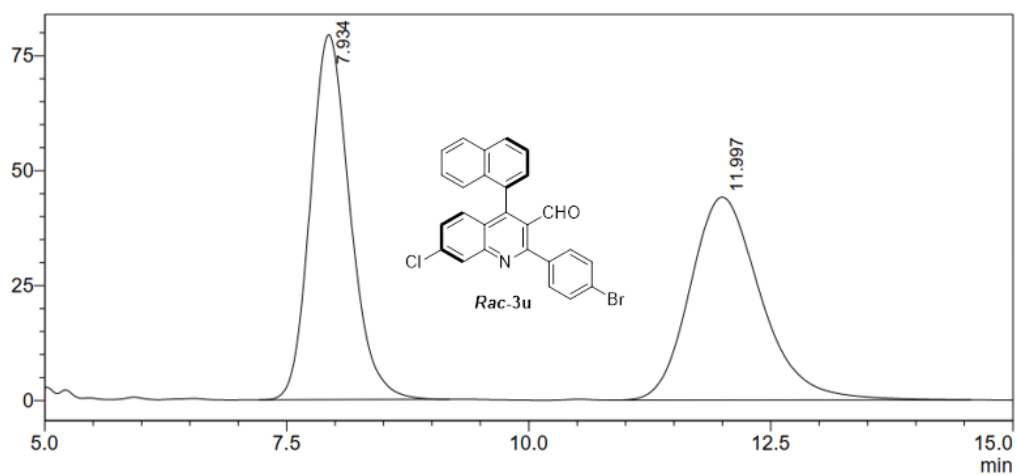

| Peak# | Ret. Time | Area%  | Area    | Height | Mark | Conc.  |
|-------|-----------|--------|---------|--------|------|--------|
| 1     | 7.934     | 50.152 | 2260245 | 79393  |      | 50.152 |
| 2     | 11.997    | 49.848 | 2246587 | 44159  |      | 49.848 |

mV

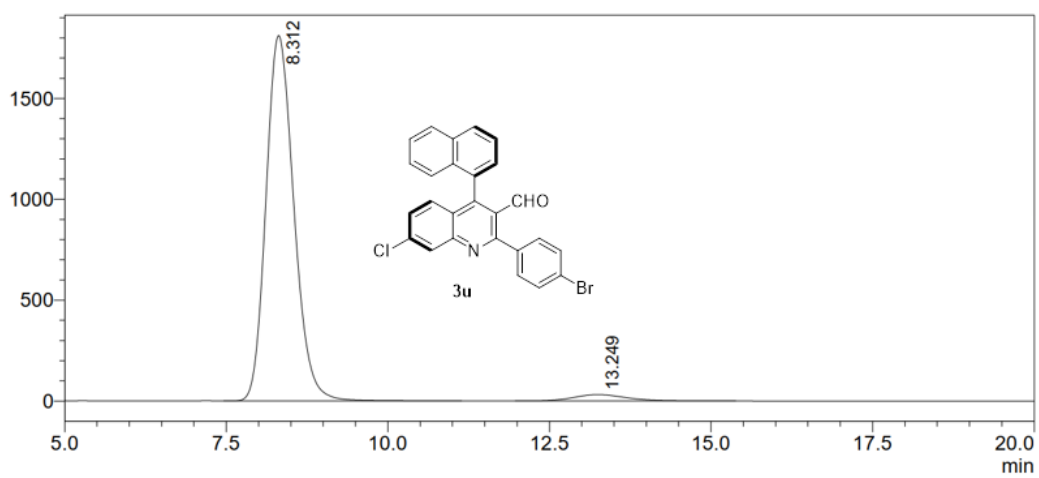

| Peak# | Ret. Time | Area%  | Area     | Height  | Mark | Conc.  |
|-------|-----------|--------|----------|---------|------|--------|
| 1     | 8.312     | 96.800 | 54306029 | 1810992 | M    | 96.800 |
| 2     | 13.249    | 3.200  | 1795088  | 31396   | M    | 3.200  |

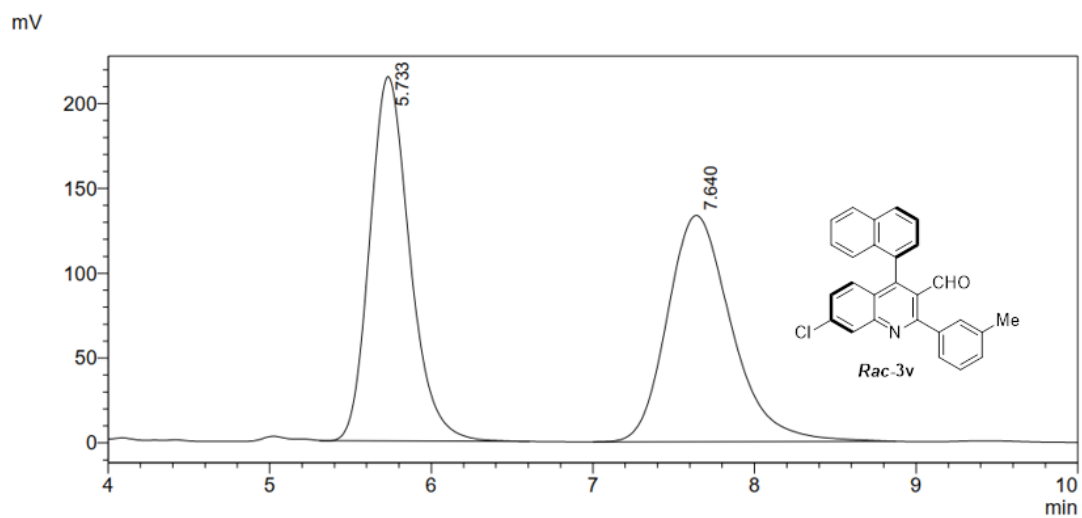

| Peak# | Ret. Time | Area%  | Area    | Height | Mark | Conc.  |
|-------|-----------|--------|---------|--------|------|--------|
| 1     | 5.733     | 50.161 | 3701635 | 214748 | M    | 50.161 |
| 2     | 7.640     | 49.839 | 3677833 | 133402 | M    | 49.839 |

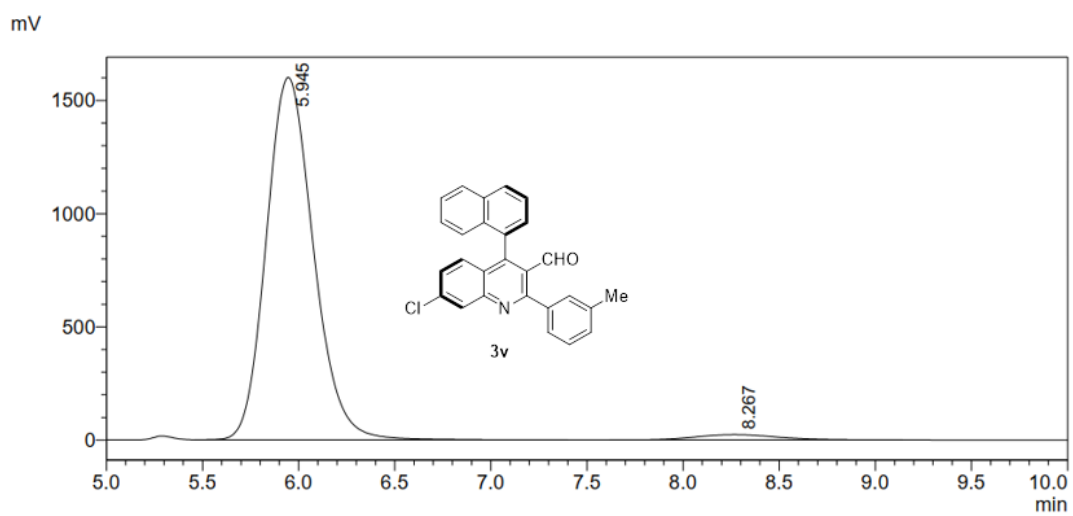

| Peak# | Ret. Time | Area%  | Area     | Height  | Mark | Conc.  |
|-------|-----------|--------|----------|---------|------|--------|
| 1     | 5.945     | 97.498 | 27313608 | 1600613 | M    | 97.498 |
| 2     | 8.267     | 2.502  | 700887   | 23440   | M    | 2.502  |

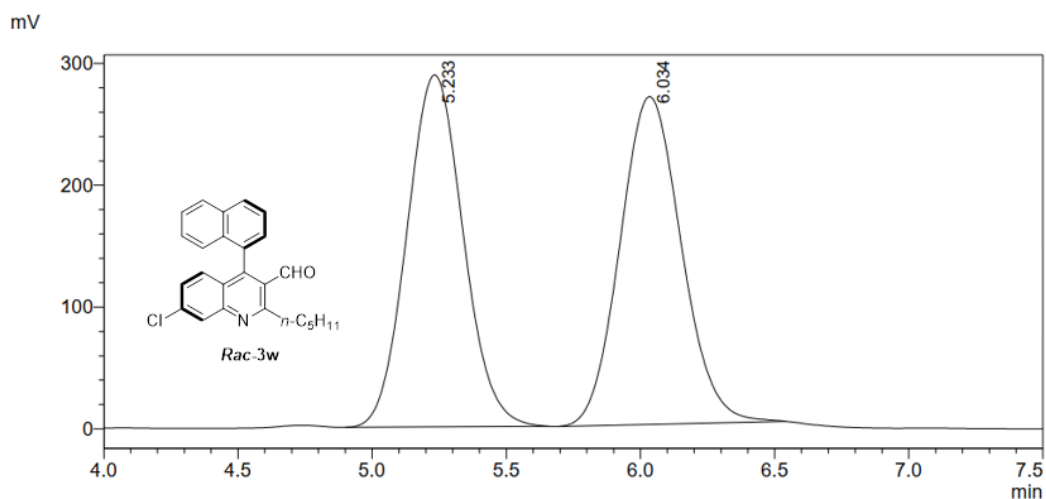

| Peak# | Ret. Time | Area%  | Area    | Height | Mark | Conc.  |
|-------|-----------|--------|---------|--------|------|--------|
| 1     | 5.233     | 49.612 | 4215130 | 289192 | M    | 49.612 |
| 2     | 6.034     | 50.388 | 4281141 | 269192 | M    | 50.388 |

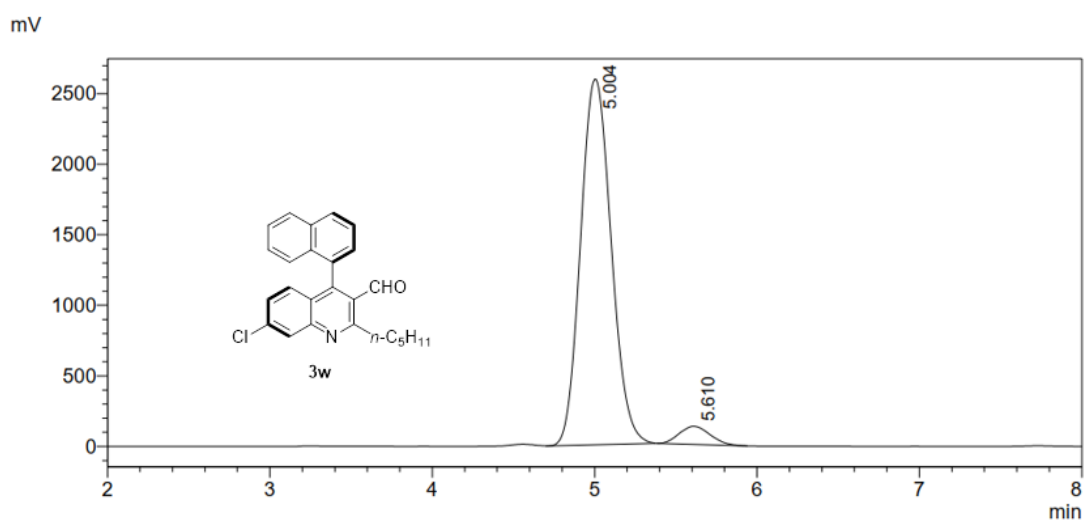

| Peak# | Ret. Time | Area%  | Area     | Height  | Mark | Conc.  |
|-------|-----------|--------|----------|---------|------|--------|
| 1     | 5.004     | 95.258 | 33899231 | 2590992 | M    | 95.258 |
| 2     | 5.610     | 4.742  | 1687554  | 127615  | M    | 4.742  |

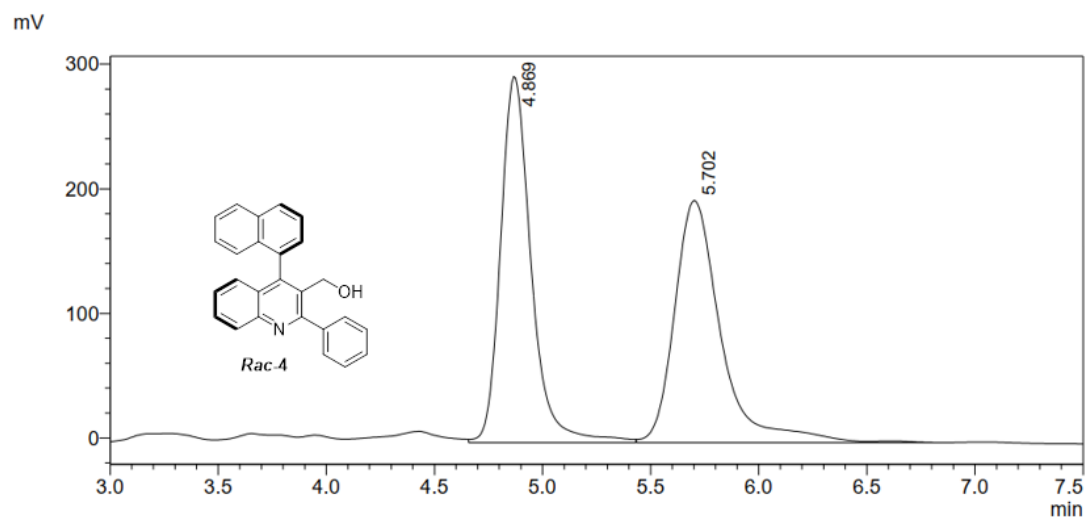

| Peak# | Ret. Time | Area%  | Area    | Height | Mark | Conc.  |
|-------|-----------|--------|---------|--------|------|--------|
| 1     | 4.869     | 49.980 | 2901035 | 293576 |      | 49.980 |
| 2     | 5.702     | 50.020 | 2903380 | 194261 | V    | 50.020 |

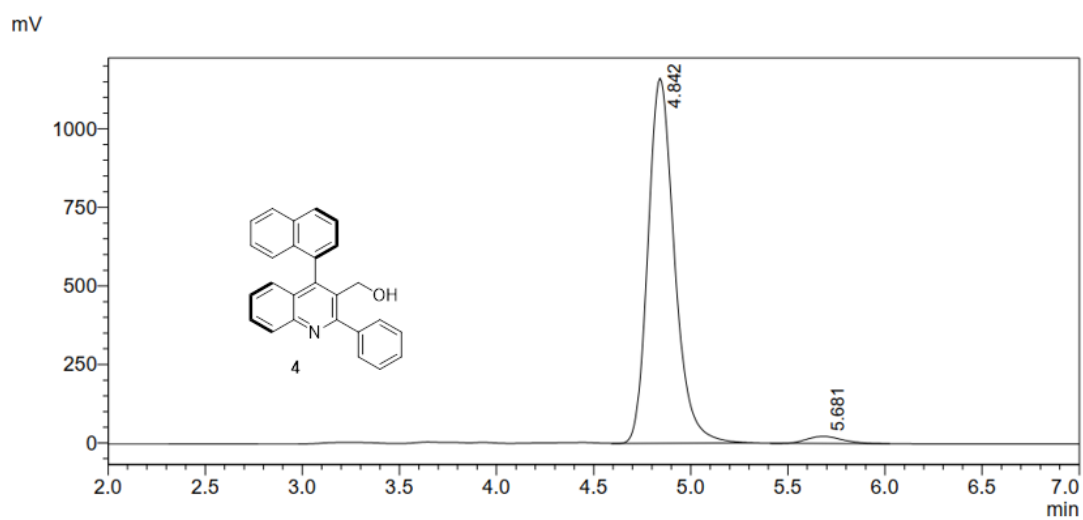

| Peak# | Ret. Time | Area%  | Area     | Height  | Mark | Conc.  |
|-------|-----------|--------|----------|---------|------|--------|
| 1     | 4.842     | 97.428 | 11053384 | 1161514 | M    | 97.428 |
| 2     | 5.681     | 2.572  | 291755   | 22628   | M    | 2.572  |

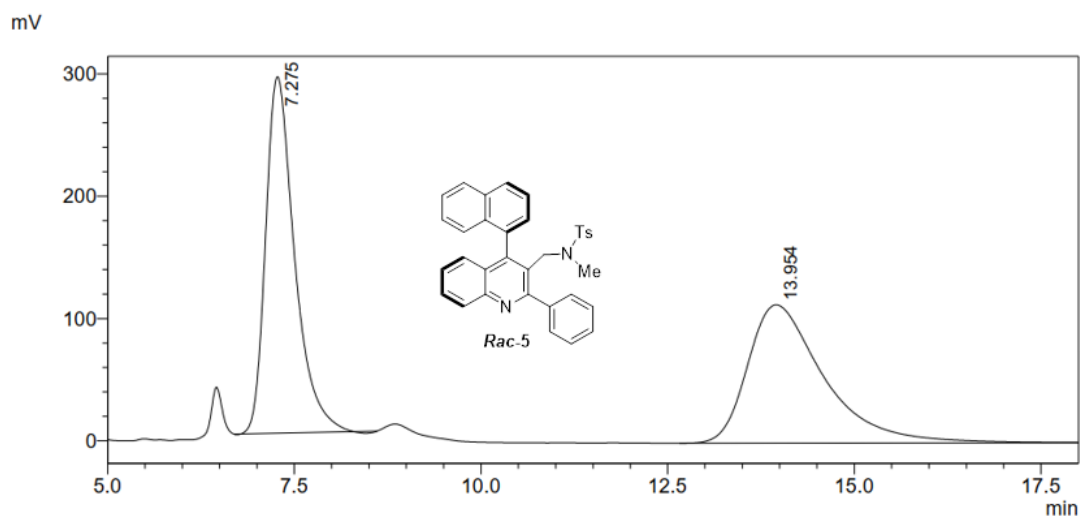

| Peak# | Ret. Time | Area%  | Area    | Height | Mark | Conc.  |
|-------|-----------|--------|---------|--------|------|--------|
| 1     | 7.275     | 49.507 | 7851158 | 291508 | M    | 49.507 |
| 2     | 13.954    | 50.493 | 8007545 | 112951 |      | 50.493 |

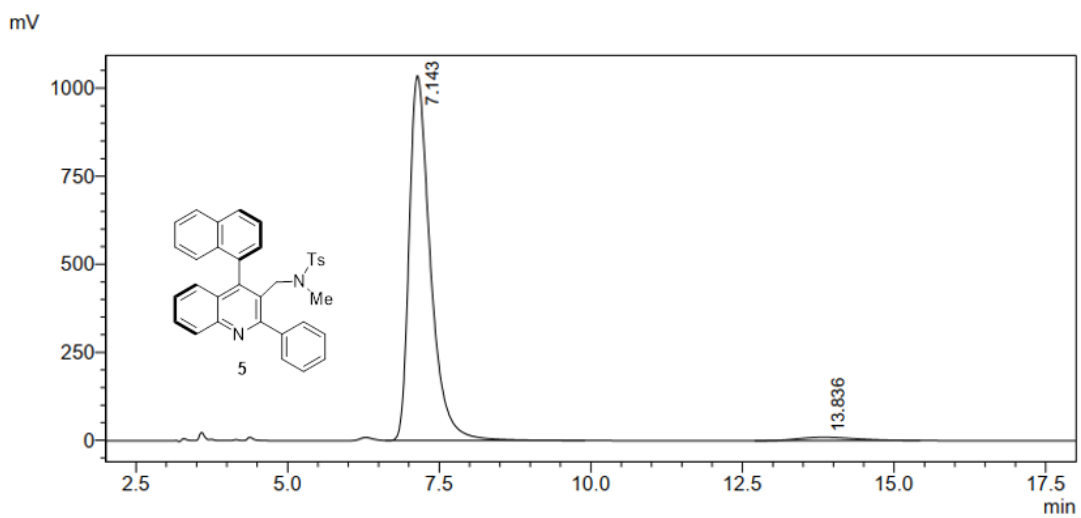

| Peak# | Ret. Time | Area%  | Area     | Height  | Mark | Conc.  |
|-------|-----------|--------|----------|---------|------|--------|
| 1     | 7.143     | 97.566 | 25163526 | 1035464 | M    | 97.566 |
| 2     | 13.836    | 2.434  | 627758   | 9477    | M    | 2.434  |

mV

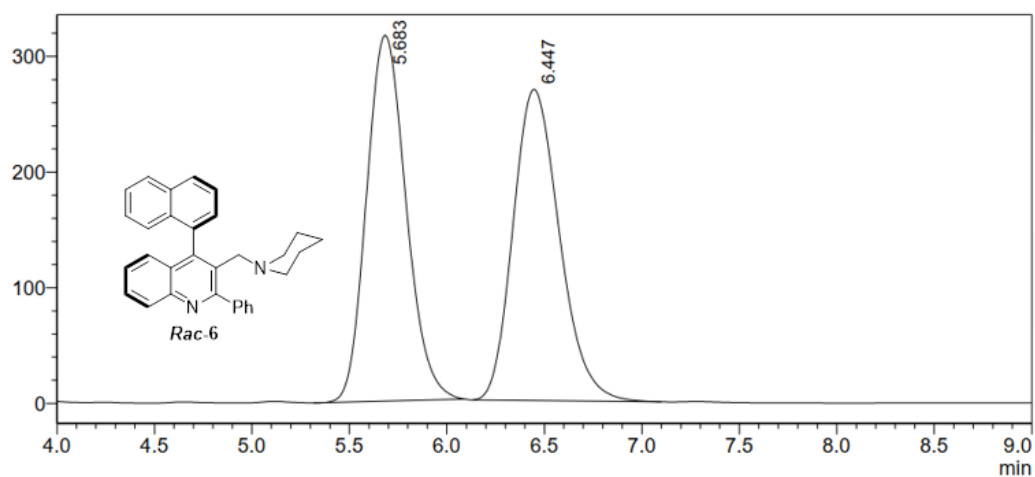

| Peak# | Ret. Time | Area%  | Area    | Height | Mark | Conc.  |
|-------|-----------|--------|---------|--------|------|--------|
| 1     | 5.683     | 50.076 | 4469347 | 316457 | M    | 50.076 |
| 2     | 6.447     | 49.924 | 4455741 | 269059 | M    | 49.924 |

mV

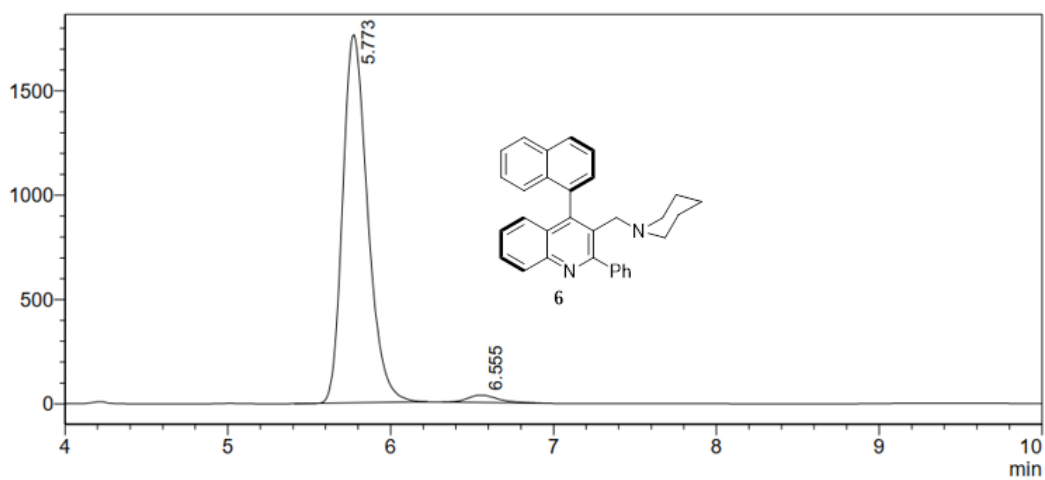

| Peak# | Ret. Time | Area%  | Area     | Height  | Mark | Conc.  |
|-------|-----------|--------|----------|---------|------|--------|
| 1     | 5.773     | 97.582 | 18878222 | 1763856 | M    | 97.582 |
| 2     | 6.555     | 2.418  | 467789   | 35341   | M    | 2.418  |



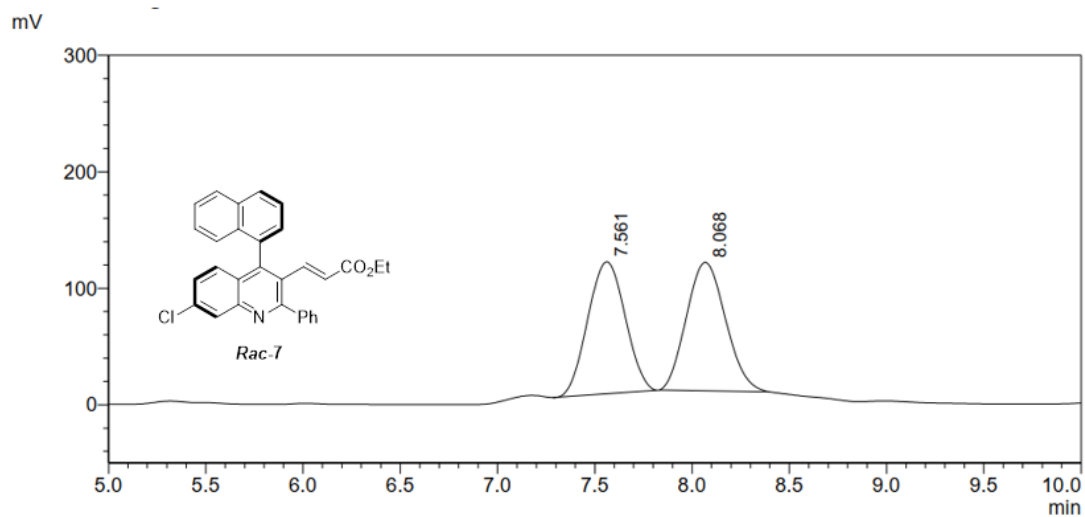

| Peak# | Ret. Time | Area%  | Area    | Height | Mark | Conc.  |
|-------|-----------|--------|---------|--------|------|--------|
| 1     | 7.561     | 49.566 | 1518410 | 113251 | M    | 49.566 |
| 2     | 8.068     | 50.434 | 1544990 | 110186 | M    | 50.434 |

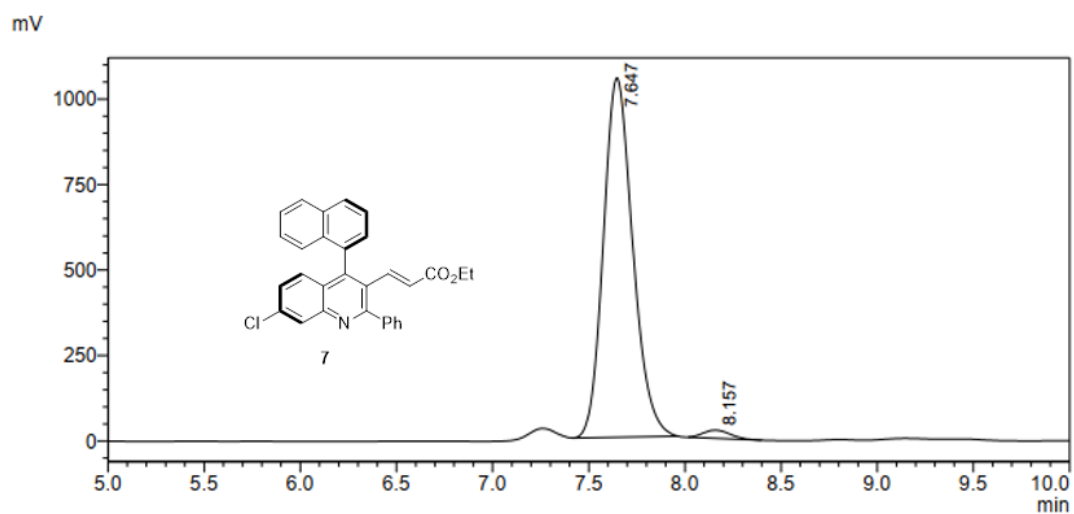

| Peak# | Ret. Time | Area%  | Area     | Height  | Mark | Conc.  |
|-------|-----------|--------|----------|---------|------|--------|
| 1     | 7.647     | 97.982 | 11189311 | 1050176 | M    | 97.982 |
| 2     | 8.157     | 2.018  | 230426   | 23739   | M    | 2.018  |

mV

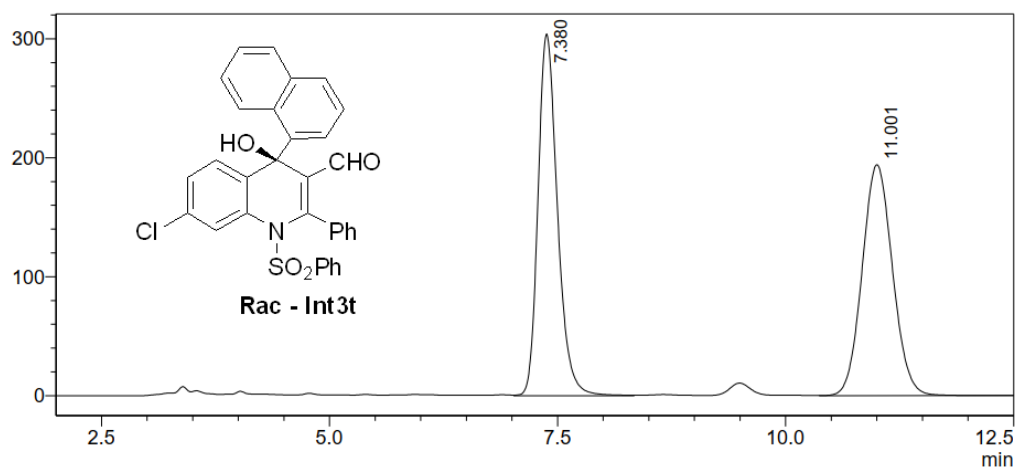

| Peak# | Ret. Time | Area%  | Area    | Height | Mark | Conc.  |
|-------|-----------|--------|---------|--------|------|--------|
| 1     | 7.380     | 50.073 | 4506991 | 303899 |      | 50.073 |
| 2     | 11.001    | 49.927 | 4493860 | 194051 |      | 49.927 |

mV

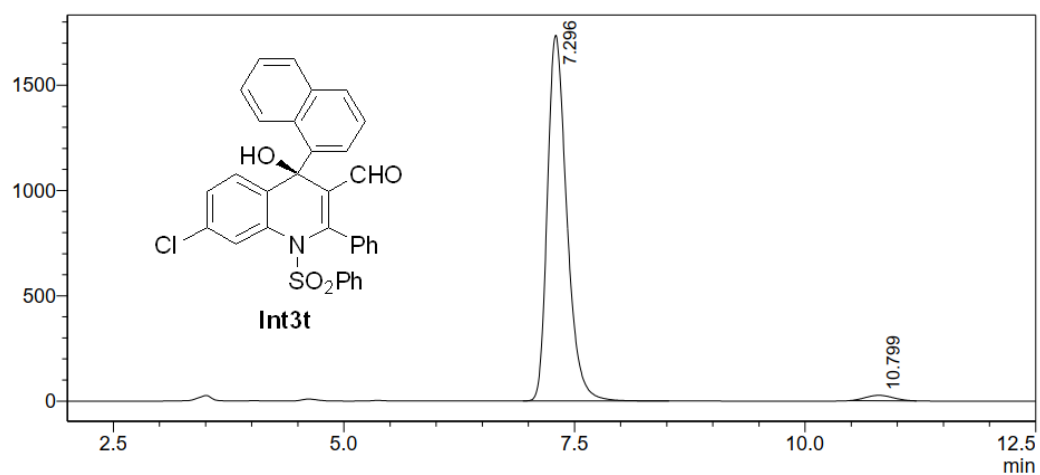

| Peak# | Ret. Time | Area%  | Area     | Height  | Mark | Conc.  |
|-------|-----------|--------|----------|---------|------|--------|
| 1     | 7.296     | 97.941 | 25424823 | 1735653 | M    | 97.941 |
| 2     | 10.799    | 2.059  | 534547   | 25803   | M    | 2.059  |
